# Supplementary material for: Aflibercept Off-Target Effects in Diabetic Macular Edema: An In Silico Modeling Approach
Source: Int J Mol Sci. 2024 Mar 23;25(7):3621. doi: 10.3390/ijms25073621 (PMC11011561; doi:10.3390/ijms25073621)
Supplement: Supplementary file 1 [file ijms-25-03621-s001.zip › Supplementary Tables.xlsx]

## Sheet: Title page
SUPPLEMENTARY TABLES Aflibercept off-target effects in diabetic macular edema: an in silico modelling approach AUTHORS:Morgane Blanot1, Ricardo P Casaroli-Marano2,3, Jordi Mondéjar Medrano4, Thaïs Sallén4, Esther Ramírez1, Cristina Segú-Verges1,5, Laura Artigas1,* AFFILIATIONS: 1. Anaxomics Biotech SL, Barcelona, Spain. 2. Department of Surgery (FMCS), Universitat de Barcelona, Barcelona, Spain. …

## Sheet: S1
Supplementary table S1: List of genes mentioned throughout the study and their corresponding protein name
Gene name (Uniprot)	Protein name	Gene name/Protein short name (used in text/figures)	Uniprot code
AGER	Advanced glycosylation end product-specific receptor	AGER	Q15109
AGT	Angiotensinogen	AGT	P01019
AKR1B1	Aldo-keto reductase family 1 member B1	AKR1B1	P15121
AKT1	Protein kinase B (PKB) / RAC-alpha serine/threonine-protein kinase	AKT1	P31749
AKT2	Protein kinase B beta / RAC-beta serine/threonine-protein kinase	AKT2	P31751
AKT3	Protein kinase B gamma / RAC-gamma serine/threonine-protein kinase	AKT3	Q9Y243
ANGPT2	Angiopoietin 2	ANGPT2	O15123
AOC3	Membrane primary amine oxidase	AOC3	Q16853
APLN	Apelin	APLN	Q9ULZ1
ARNT	Aryl hydrocarbon receptor nuclear translocator	ARNT	P27540
ATF2	Cyclic AMP-dependent transcription factor ATF-2	ATF2	P15336
ATP1A3	Sodium/potassium-transporting ATPase subunit alpha-3	ATP1A3	P13637
ATP1B2	Sodium/potassium-transporting ATPase subunit beta-2	ATP1B2	P14415
BAD	Bcl2-associated agonist of cell death	BAD	Q92934
BCL2	Apoptosis regulator Bcl-2	BCL2	P10415
BCL2L11	Bcl-2-like protein 11 / Bcl2-interacting mediator of cell death	BCL2L11	O43521
C5	Complement C5	C5	P01031
C6	Complement component C6	C6	P13671
C7	Complement component C7	C7	P10643
C8A	Complement component C8 alpha chain	C8A	P07357
C8B	Complement component C8 beta chain	C8B	P07358
C9	Complement component C9	C9	P02748
CA9	Carbonic anhydrase 9	CA9	Q16790
CAMKK2	Calcium/calmodulin-dependent protein kinase kinase 2	CAMKK2	Q96RR4
CCL2	C-C motif chemokine 2	CCL2	P13500
CCL5	C-C motif chemokine 5	CCL5	P13501
CDC42	Cell division control protein 42 homolog	CDC42	P60953
CDH2	Cadherin-2	CDH2	P19022
CDH5	Cadherin-5	CDH5	P33151
CLDN1	Claudin-1	CLDN1	O95832
CLDN12	Claudin-12	CLDN12	P56749
CLDN2	Claudin-2	CLDN2	P57739
CLDN5	Claudin-5	CLDN5	O00501
COL4A1	Collagen alpha-1(IV) chain	COL4A1	P02462
COL4A2	Collagen alpha-2(IV) chain	COL4A2	P08572
COL4A3	Collagen alpha-3(IV) chain	COL4A3	Q01955
COL4A4	Collagen alpha-4(IV) chain	COL4A4	P53420
COL4A5	Collagen alpha-5(IV) chain	COL4A5	P29400
COL4A6	Collagen alpha-6(IV) chain	COL4A6	Q14031
CREB1	Cyclic AMP-responsive element-binding protein 1	CREB1	P16220
CREB3	Cyclic AMP-responsive element-binding protein 3	CREB3	O43889
CTNNB1	Catenin beta-1	CTNNB1	P35222
CXCL10	C-X-C motif chemokine 10	CXCL10	P02778
CXCL12	Stromal cell-derived factor 1	CXCL12	P48061
CXCL8	Interleukin-8	CXCL8	P10145
CXCR4	C-X-C chemokine receptor type 4	CXCR4	P61073
DLL4	Delta-like protein 4	DLL4	Q9NR61
EGR1	Early growth response protein 1	EGR1	P18146
EPO	Erythropoietin	EPO	P01588
EPOR	Erythropoietin receptor	EPOR	P19235
ESR1	Estrogen receptor	ESR1	P03372
ETS1	Protein C-ets-1	ETS1	P14921
ETS2	Protein C-ets-2	ETS2	P15036
FCGR1	High affinity immunoglobulin gamma Fc receptor I	FCGR1	P12314
FGF2	Fibroblast growth factor 2	FGF2	P09038
FN1	Fibronectin	FN1	P02751
FOS	Protein c-Fos	FOS	P01100
G6PD	Glucose-6-phosphate 1-dehydrogenase	G6PD	P11413
GAPDH	Glyceraldehyde-3-phosphate dehydrogenase	GAPDH	P04406
GATA4	Transcription factor GATA-4	GATA4	P43694
GJA1	Gap junction alpha-1 protein	GJA1	P17302
GRIN1	Glutamate receptor ionotropic	GRIN1	Q05586
HGF	Hepatocyte growth factor	HGF	P14210
HIF1A	Hypoxia-inducible factor 1-alpha	HIF1A	Q16665
HRH1	Histamine H1 receptor	HRH1	P35367
HRH2	Histamine H2 receptor	HRH2	P25021
ICAM1	Intercellular adhesion molecule 1	ICAM1	P05362
IGF1	Insulin-like growth factor I	IGF1	P05019
IKBKG	NF-kappa-B essential modulator	IKBKG	Q9Y6K9
IL1A	Interleukin-1 alpha	IL1A	P01583
IL1B	Interleukin-1 beta	IL1B	P01584
IL6	Interleukin-6	IL6	P05231
IL6R	Interleukin-6 receptor subunit alpha	IL6R	P08887
JAG1	Protein jagged-1	JAG1	P78504
JAK1	Tyrosine-protein kinase JAK1	JAK1	P23458
JAK2	Tyrosine-protein kinase JAK2	JAK2	O60674
JAK3	Tyrosine-protein kinase JAK3	JAK3	P52333
JUN	Transcription factor AP-1	JUN	P05412
KLK1	Kallikrein-1	KLK1	P06870
KLK2	Kallikrein-2	KLK2	P20151
KNG1	Kininogen-1	KNG1	P01042
LAMA1	Laminin subunit alpha-1	LAMA1	P25391
LAMA2	Laminin subunit alpha-2	LAMA2	P24043
LAMA3	Laminin subunit alpha-3	LAMA3	Q16787
LAMA4	Laminin subunit alpha-4	LAMA4	Q16363
LAMA5	Laminin subunit alpha-5	LAMA5	O15230
LAMB1	Laminin subunit beta-1	LAMB1	P07942
LAMB2	Laminin subunit beta-2	LAMB2	P55268
LAMB4	Laminin subunit beta-4	LAMB4	A4D0S4
LAMC1	Laminin subunit gamma-1	LAMC1	P11047
LAMC3	Laminin subunit gamma-3	LAMC3	Q9Y6N6
LEG1	Protein LEG1 homolog	LEG1	Q6P5S2
LGALS1	Galectin-1	Gal-1	P09382
MAP2K1	Dual specificity mitogen-activated protein kinase kinase 1	MAP2K1	Q02750
MAP2K2	Dual specificity mitogen-activated protein kinase kinase 2	MAP2K2	P36507
MAPK1	Mitogen-activated protein kinase 1	MAPK1	P28482
MAPK10	Mitogen-activated protein kinase 10	MAPK10	P53779
MAPK11	Mitogen-activated protein kinase 11	MAPK11	Q15759
MAPK12	Mitogen-activated protein kinase 12	MAPK12	P53778
MAPK13	Mitogen-activated protein kinase 13	MAPK13	O15264
MAPK14	Mitogen-activated protein kinase 14	MAPK14 / p68	Q16539
MAPK3	Mitogen-activated protein kinase 3	MAPK3	L7RXH5
MAPK8	Mitogen-activated protein kinase 8	MAPK8	P45983
MAPK9	Mitogen-activated protein kinase 9	MAPK9	P45984
MCP1	Monocyte chemoattractant protein 1	MCP1	Q6UZ82
MET	Hepatocyte growth factor receptor	MET	P08581
MMP1	Interstitial collagenase	MMP1	P03956
MMP2	72 kDa type IV collagenase	MMP2	P08253
MMP9	Matrix metalloproteinase-9	MMP9	P14780
MTOR	Serine/threonine-protein kinase mTOR	MTOR	P42345
MYC	Myc proto-oncogene protein	MYC	P01106
NFKB1	Nuclear factor NF-kappa-B p105 subunit	NFKB1	P19838
NFKB2	Nuclear factor NF-kappa-B p100 subunit	NFKB2	Q00653
NOS2	Nitric oxide synthase	NOS2	P35228
NOS3	Nitric oxide synthase, endothelial	NOS3	P29474
NOTCH1	Neurogenic locus notch homolog protein 1	NOTCH1	P46531
NR3C1	Glucocorticoid receptor	NR3C1	P04150
NRP1	Neuropilin-1	NRP1	O14786
NRP2	Neuropilin-2	NRP2	O60462
NTN1	Netrin-1	NTN1	O95631
OCLN	Occludin	OCLN	Q16625
PDGFB	Platelet-derived growth factor subunit B	PDGFB	P01127
PGF	Placenta growth factor	PlGF	P49763
PIK3CA	Phosphatidylinositol 4,5-bisphosphate 3-kinase catalytic subunit alpha isoform	PIK3CA	P42336
PIK3CB	Phosphatidylinositol 4,5-bisphosphate 3-kinase catalytic subunit beta isoform	PIK3CB	P42338
PIK3CD	Phosphatidylinositol 4,5-bisphosphate 3-kinase catalytic subunit delta isoform	PIK3CD	O00329
PIK3CG	Phosphatidylinositol 4,5-bisphosphate 3-kinase catalytic subunit gamma isoform	PIK3CG	P48736
PIK3R1	Phosphatidylinositol 3-kinase regulatory subunit alpha	PIK3R1	P27986
PIK3R2	Phosphatidylinositol 3-kinase regulatory subunit beta	PIK3R2	O00459
PLA2G4A	Cytosolic phospholipase A2	PLA2G4A	P47712
PLCG1	1-phosphatidylinositol 4,5-bisphosphate phosphodiesterase gamma-1	PLCG1	P19174
PLCG2	1-phosphatidylinositol 4,5-bisphosphate phosphodiesterase gamma-2	PLCG2	P16885
PRDX1	Peroxiredoxin-1	PRDX1	Q06830
PRDX3	Thioredoxin-dependent peroxide reductase	PRDX3	P30048
PRDX6	Peroxiredoxin-6	PRDX6	P30041
PRKACA	cAMP-dependent protein kinase catalytic subunit alpha	PRKACA	P17612
PRKCA	Protein kinase C alpha type	PRKCA	P17252
PRKCB	Protein kinase C beta type	PRKCB	P05771
PRKCD	Protein kinase C delta type	PRKCD	Q05655
PRKCI	Protein kinase C iota type	PRKCI	P41743
PRKCZ	Protein kinase C zeta type	PRKCZ	Q05513
PTGS1	Prostaglandin G/H synthase 1	PTGS1	P23219
PTGS2	Prostaglandin G/H synthase 2	PTGS2	P35354
PTK2	Focal adhesion kinase 1	PTK2	Q05397
PTPN11	Tyrosine-protein phosphatase non-receptor type 11	PTPN11	Q06124
RAC1	Ras-related C3 botulinum toxin substrate 1	RAC1	P63000
RAF1	RAF proto-oncogene serine/threonine-protein kinase	RAF1	P04049
RELA	Transcription factor p65	RELA / p65	Q04206
ROBO4	Roundabout homolog 4	ROBO4	Q8WZ75
SELE	E-selectin	SELE	P16581
SEMA3A	Semaphorin-3A	SEMA3A	Q14563
SERPINF1	Pigment epithelium-derived factor	SERPINF1	P36955
SHC2	SHC-transforming protein 2	SHC2	P98077
SHH	Sonic hedgehog protein	SHH	Q15465
SLC2A1	Solute carrier family 2, facilitated glucose transporter member 1	SLC2A1	P11166
SLC5A2	Sodium/glucose cotransporter 2	SLC5A2	P31639
SLIT2	Slit homolog 2 protein	SLIT2	O94813
SNAI2	Zinc finger protein SNAI2	SNAI2	O43623
SOD2	Superoxide dismutase [Mn]	SOD2	P04179
SRC	Proto-oncogene tyrosine-protein kinase Src	SRC	P12931
STAT1	Signal transducer and activator of transcription 1-alpha/beta	STAT1	P42224
STAT3	Signal transducer and activator of transcription 1-alpha/beta	STAT3	P42224
TEK	Angiopoietin-1 receptor	TEK	Q02763
TGFB/TGFB1	Transforming growth factor beta-1 proprotein	TGFB/TGFB1	P01137
TGFBI	Transforming growth factor-beta-induced protein ig-h3	TGFBI	Q15582
TIE1	Tyrosine-protein kinase receptor Tie-1	TIE1	P35590
TJP1	Tight junction protein ZO-1	TJP1	Q07157
TNF	Tumor necrosis factor	TNF / TNF-α	P01375
TNFRSF1A	Tumor necrosis factor receptor superfamily member 1A	TNFRSF1A	P19438
TP53	Cellular tumor antigen p53	TP53	P04637
UNC5B	Netrin receptor UNC5B	UNC5B	Q8IZJ1
VCAM1	Vascular cell adhesion protein 1	VCAM1	P19320
VEGFA	Vascular endotelial growht factor A	VEGF-A	P15692
VEGFB	Vascular endothelial growth factor B	VEGF-B	P49765
VEGFR1	Vascular endothelial growth factor receptor 1	VEGFR1	P17948
VEGFR2	Vascular endothelial growth factor receptor 2	VEGFR2	P35968

## Sheet: S2
Supplementary Table S2. Pathophysiological process of diabetic macular edema characterized at the protein level. The table shows the effector protein name, the corresponding process, the causative effect and the references. Causative effect column indicates whether the protein is increased/overactivated (1) or reduced/inhibited (-1) in the context of diabetic macular edema. Note that proteins can…
Process	Effector Protein (Name)	Effector Protein (Short Name)	Effector Protein (Uniprot)	Causative Effect (1, -1)	Reference
Oxidative stress	Advanced glycosylation end product-specific receptor	AGER	Q15109	1	[1] PMID: 24955234
Oxidative stress	Aldo-keto reductase family 1 member B1	AKR1B1	P15121	1	[1] PMID: 20222885 ; [2] PMID: 23416119
Oxidative stress	Aryl hydrocarbon receptor nuclear translocator	ARNT	P27540	1	[1] PMID: 27130369 ; [2] PMID: 23416119
Oxidative stress	Calcium/calmodulin-dependent protein kinase kinase 2	CAMKK2	Q96RR4	1	[1] doi.org/10.1016/j.preteyeres.2017.10.006
Oxidative stress	Carbonic anhydrase 9	CA9	Q16790	1	[1] PMID: 27130369 ; [2] PMID: 23416119
Oxidative stress	Erythropoietin	EPO	P01588	-1	[1] PMID: 27130369 ; [2] PMID: 23416119 ; [3] PMID: 33274237
Oxidative stress	Glucose-6-phosphate 1-dehydrogenase	G6PD	P11413	-1	[1] PMID: 32813141
Oxidative stress	Glyceraldehyde-3-phosphate dehydrogenase	GAPDH	P04406	-1	[1] PMID: 27130369 ; [2] PMID: 23416119 ; [3] PMID: 18852331
Oxidative stress	Hypoxia-inducible factor 1-alpha	HIF1A	Q16665	1	[1] PMID: 27130369 ; [2] PMID: 23416119
Oxidative stress	Nitric oxide synthase	NOS2	P35228	1	[1] PMID: 27130369 ; [2] PMID: 23416119 ; [3] PMID: 20222885
Oxidative stress	Peroxiredoxin-1	PRDX1	Q06830	-1	[1] PMID: 32813141
Oxidative stress	Peroxiredoxin-6	PRDX6	P30041	-1	[1] PMID: 32813141
Oxidative stress	Sodium/glucose cotransporter 2	SLC5A2	P31639	1	[1] DOI: 10.1177/2042018819891886 ; [2] doi.org/10.1210/clinem/dgab050
Oxidative stress	Solute carrier family 2, facilitated glucose transporter member 1	SLC2A1	P11166	1	[1] PMID: 27130369 ; [2] PMID: 23416119 ; [3] PMID: 8822374
Oxidative stress	Superoxide dismutase [Mn]	SOD2	P04179	-1	[1] PMID: 33274237								Exclusion criteria for discarding data included:
Oxidative stress	Thioredoxin-dependent peroxide reductase	PRDX3	P30048	-1	[1] PMID: 32813141								- If data was not comming from Homo Sapiens.
Oxidative stress	Vascular endothelial growth factor A	VEGFA	P15692	1	[1] PMID: 27130369 ; [2] PMID: 23416119 ; [3] PMID: 20222885								- Not related to the condition of interest (development studies, regular retina, etc).
Oxidative stress	Vascular endothelial growth factor receptor 2	KDR	P35968	1	[1] PMID: 20222885								- Data from samples of tissues not relevant to the condition of interest.
Inflammation	Advanced glycosylation end product-specific receptor	AGER	Q15109	1	[1] PMID: 26113500 ; [2] PMID: 25687235
Inflammation	C-C motif chemokine 2	CCL2	P13500	1	[1] PMID: 29473719
Inflammation	C-C motif chemokine 5	CCL5	P13501	1	[1] PMID: 29473719
Inflammation	Complement C5	C5	P01031	1	[1] PMID: 26113500 ; [2] PMID: 32504038
Inflammation	Complement component C6	C6	P13671	1	[1] PMID: 26113500 ; [2] PMID: 32504038
Inflammation	Complement component C7	C7	P10643	1	[1] PMID: 26113500 ; [2] PMID: 32504038
Inflammation	Complement component C8 alpha chain	C8A	P07357	1	[1] PMID: 26113500 ; [2] PMID: 32504038
Inflammation	Complement component C8 beta chain	C8B	P07358	1	[1] PMID: 26113500 ; [2] PMID: 32504038
Inflammation	Complement component C9	C9	P02748	1	[1] PMID: 26113500 ; [2] PMID: 32504038
Inflammation	C-X-C motif chemokine 10	CXCL10	P02778	1	[1] PMID: 29473719
Inflammation	E-selectin	SELE	P16581	1	[1] PMID: 26113500
Inflammation	Intercellular adhesion molecule 1	ICAM1	P05362	1	[1] PMID: 29473719
Inflammation	Interleukin-1 alpha	IL1A	P01583	1	[1] PMID: 32504038
Inflammation	Interleukin-1 beta	IL1B	P01584	1	[1] PMID: 29473719
Inflammation	Interleukin-6	IL6	P05231	1	[1] PMID: 29473719
Inflammation	Interleukin-8	CXCL8	P10145	1	[1] PMID: 29473719
Inflammation	Matrix metalloproteinase-9	MMP9	P14780	1	[1] PMID: 32504038 ; [2] PMID: 22519597
Inflammation	Membrane primary amine oxidase	AOC3	Q16853	1	[1] PMID: 29473719
Inflammation	Mitogen-activated protein kinase 14	MAPK14	Q16539	1	[1] PMID: 32815413 ; [2] PMID: 19631642
Inflammation	Nitric oxide synthase	NOS2	P35228	1	[1] PMID: 32504038
Inflammation	Nuclear factor NF-kappa-B p100 subunit	NFKB2	Q00653	1	[1] PMID: 19349783
Inflammation	Nuclear factor NF-kappa-B p105 subunit	NFKB1	P19838	1	[1] PMID: 19349783
Inflammation	Pigment epithelium-derived factor	SERPINF1	P36955	-1	[1] PMID: 24106640
Inflammation	Placenta growth factor	PGF	P49763	1	[1] doi.org/10.1016/j.preteyeres.2021.100954 ; [2] doi: 10.1111/aos.13325 ; [3] https://doi.org/10.1016/j.exer.2017.09.012
Inflammation	Prostaglandin G/H synthase 1	PTGS1	P23219	1	[1] PMID: 29715408
Inflammation	Prostaglandin G/H synthase 2	PTGS2	P35354	1	[1] PMID: 29715408
Inflammation	Sodium/glucose cotransporter 2	SLC5A2	P31639	1	[1] DOI: 10.1177/2042018819891886 ; [2] doi.org/10.1210/clinem/dgab050
Inflammation	Stromal cell-derived factor 1	CXCL12	P48061	1	[1] PMID: 29473719
Inflammation	Transcription factor p65	RELA	Q04206	1	[1] PMID: 19349783
Inflammation	Tumor necrosis factor	TNF	P01375	1	[1] PMID: 29473719 ; [2] PMID: 25935789
Inflammation	Vascular cell adhesion protein 1	VCAM1	P19320	1	[1] PMID: 29473719
Inflammation	Vascular endothelial growth factor A	VEGFA	P15692	1	[1] doi.org/10.1016/j.preteyeres.2021.100954 ; [2] https://doi.org/10.1016/j.exer.2017.09.012
Inflammation	Vascular endothelial growth factor receptor 1	FLT1	P17948	1	[1] doi.org/10.1016/j.preteyeres.2021.100954
Alteration of the Blood Retinal Barrier and increased vascular permeability	72 kDa type IV collagenase	MMP2	P08253	1	[1] PMID: 25935789 ; [2] PMID: 19171208 ; [3] doi.org/10.1016/j.preteyeres.2017.10.006
Alteration of the Blood Retinal Barrier and increased vascular permeability	Angiopoietin-1 receptor	TEK	Q02763	-1	[1] PMID: 23416119
Alteration of the Blood Retinal Barrier and increased vascular permeability	Angiopoietin-2	ANGPT2	O15123	1	[1] PMID: 29473719 ; [2] PMID: 23416119 ; [3] doi: 10.1111/aos.13325
Alteration of the Blood Retinal Barrier and increased vascular permeability	Angiotensinogen	AGT	P01019	1	[1] PMID: 20222885
Alteration of the Blood Retinal Barrier and increased vascular permeability	Apelin	APLN	Q9ULZ1	1	[1] PMID: 29850504
Alteration of the Blood Retinal Barrier and increased vascular permeability	Cadherin-2	CDH2	P19022	-1	[1] PMID: 23416119
Alteration of the Blood Retinal Barrier and increased vascular permeability	Cadherin-5	CDH5	P33151	-1	[1] PMID: 25935789
Alteration of the Blood Retinal Barrier and increased vascular permeability	cAMP-dependent protein kinase catalytic subunit alpha	PRKACA	P17612	1	[1] PMID: 19171208
Alteration of the Blood Retinal Barrier and increased vascular permeability	Catenin beta-1	CTNNB1	P35222	-1	[1] PMID: 23416119
Alteration of the Blood Retinal Barrier and increased vascular permeability	C-C motif chemokine 2	CCL2	P13500	1	[1] PMID: 25935789
Alteration of the Blood Retinal Barrier and increased vascular permeability	Cellular tumor antigen p53	TP53	P04637	1	[1] doi.org/10.1016/j.preteyeres.2017.10.006 ; [2] doi:10.2337/db13-1942
Alteration of the Blood Retinal Barrier and increased vascular permeability	Claudin-1	CLDN1	O95832	-1	[1] PMID: 19171208 ; [2] PMID: 23416119
Alteration of the Blood Retinal Barrier and increased vascular permeability	Claudin-12	CLDN12	P56749	-1	[1] PMID: 19171208 ; [2] PMID: 23416119
Alteration of the Blood Retinal Barrier and increased vascular permeability	Claudin-2	CLDN2	P57739	-1	[1] PMID: 19171208 ; [2] PMID: 23416119
Alteration of the Blood Retinal Barrier and increased vascular permeability	Claudin-5	CLDN5	O00501	-1	[1] PMID: 19171208 ; [2] PMID: 23416119
Alteration of the Blood Retinal Barrier and increased vascular permeability	Collagen alpha-1(IV) chain	COL4A1	P02462	1	[1] PMID: 27798121
Alteration of the Blood Retinal Barrier and increased vascular permeability	Collagen alpha-2(IV) chain	COL4A2	P08572	1	[1] PMID: 27798121
Alteration of the Blood Retinal Barrier and increased vascular permeability	Collagen alpha-3(IV) chain	COL4A3	Q01955	1	[1] PMID: 27798121
Alteration of the Blood Retinal Barrier and increased vascular permeability	Collagen alpha-4(IV) chain	COL4A4	P53420	1	[1] PMID: 27798121
Alteration of the Blood Retinal Barrier and increased vascular permeability	Collagen alpha-5(IV) chain	COL4A5	P29400	1	[1] PMID: 27798121
Alteration of the Blood Retinal Barrier and increased vascular permeability	Collagen alpha-6(IV) chain	COL4A6	Q14031	1	[1] PMID: 27798121
Alteration of the Blood Retinal Barrier and increased vascular permeability	Cytosolic phospholipase A2	PLA2G4A	P47712	1	[1] PMID: 26607863
Alteration of the Blood Retinal Barrier and increased vascular permeability	Delta-like protein 4	DLL4	Q9NR61	1	[1] PMID: 30787185
Alteration of the Blood Retinal Barrier and increased vascular permeability	Dual specificity mitogen-activated protein kinase kinase 1	MAP2K1	Q02750	1	[1] PMID: 29850504
Alteration of the Blood Retinal Barrier and increased vascular permeability	Dual specificity mitogen-activated protein kinase kinase 2	MAP2K2	P36507	1	[1] PMID: 29850504
Alteration of the Blood Retinal Barrier and increased vascular permeability	Erythropoietin	EPO	P01588	-1	[1] PMID: 27846381
Alteration of the Blood Retinal Barrier and increased vascular permeability	Fibroblast growth factor 2	FGF2	P09038	1	[1] doi.org/10.17925/EOR.2014.08.01.i ; [2] PMID: 26113500
Alteration of the Blood Retinal Barrier and increased vascular permeability	Fibronectin	FN1	P02751	1	[1] PMID: 19171208 ; [2] PMID: 27798121
Alteration of the Blood Retinal Barrier and increased vascular permeability	Galectin-1	LGALS1	P09382	1	[1] doi.org/10.1038/s41598-017-16499-8 ; [2] dx.doi.org/10.1016/j.exer.2017.02.015
Alteration of the Blood Retinal Barrier and increased vascular permeability	Gap junction alpha-1 protein	GJA1	P17302	-1	[1] PMID: 23416119
Alteration of the Blood Retinal Barrier and increased vascular permeability	Glutamate receptor ionotropic	GRIN1	Q05586	1	[1] doi:10.22608/apo.2017529
Alteration of the Blood Retinal Barrier and increased vascular permeability	Histamine H1 receptor	HRH1	P35367	1	[1] PMID: 19171208
Alteration of the Blood Retinal Barrier and increased vascular permeability	Histamine H2 receptor	HRH2	P25021	1	[1] PMID: 19171208
Alteration of the Blood Retinal Barrier and increased vascular permeability	Insulin-like growth factor I	IGF1	P05019	1	[1] PMID: 30556449 ; [2] PMID: 30026694
Alteration of the Blood Retinal Barrier and increased vascular permeability	Intercellular adhesion molecule 1	ICAM1	P05362	1	[1] PMID: 15878060
Alteration of the Blood Retinal Barrier and increased vascular permeability	Interstitial collagenase	MMP1	P03956	1	[1] doi.org/10.1371/journal.pone.0159720
Alteration of the Blood Retinal Barrier and increased vascular permeability	Kallikrein-1	KLK1	P06870	1	[1] PMID: 23416119
Alteration of the Blood Retinal Barrier and increased vascular permeability	Kallikrein-2	KLK2	P20151	1	[1] PMID: 23416119
Alteration of the Blood Retinal Barrier and increased vascular permeability	Kininogen-1	KNG1	P01042	1	[1] PMID: 23416119
Alteration of the Blood Retinal Barrier and increased vascular permeability	Laminin subunit alpha-1	LAMA1	P25391	1	[1] PMID: 19171208 ; [2] PMID: 27798121 ; [3] PMID: 23154403
Alteration of the Blood Retinal Barrier and increased vascular permeability	Laminin subunit alpha-2	LAMA2	P24043	1	[1] PMID: 19171208 ; [2] PMID: 27798121 ; [3] PMID: 23154403
Alteration of the Blood Retinal Barrier and increased vascular permeability	Laminin subunit alpha-3	LAMA3	Q16787	1	[1] PMID: 19171208 ; [2] PMID: 27798121 ; [3] PMID: 23154403
Alteration of the Blood Retinal Barrier and increased vascular permeability	Laminin subunit alpha-4	LAMA4	Q16363	1	[1] PMID: 19171208 ; [2] PMID: 27798121 ; [3] PMID: 23154403
Alteration of the Blood Retinal Barrier and increased vascular permeability	Laminin subunit alpha-5	LAMA5	O15230	1	[1] PMID: 19171208 ; [2] PMID: 27798121 ; [3] PMID: 23154403
Alteration of the Blood Retinal Barrier and increased vascular permeability	Laminin subunit beta-1	LAMB1	P07942	1	[1] PMID: 19171208 ; [2] PMID: 27798121 ; [3] PMID: 23154403
Alteration of the Blood Retinal Barrier and increased vascular permeability	Laminin subunit beta-2	LAMB2	P55268	1	[1] PMID: 19171208 ; [2] PMID: 27798121 ; [3] PMID: 23154403
Alteration of the Blood Retinal Barrier and increased vascular permeability	Laminin subunit beta-4	LAMB4	A4D0S4	1	[1] PMID: 19171208 ; [2] PMID: 27798121 ; [3] PMID: 23154403
Alteration of the Blood Retinal Barrier and increased vascular permeability	Laminin subunit gamma-1	LAMC1	P11047	1	[1] PMID: 19171208 ; [2] PMID: 27798121 ; [3] PMID: 23154403
Alteration of the Blood Retinal Barrier and increased vascular permeability	Laminin subunit gamma-3	LAMC3	Q9Y6N6	1	[1] PMID: 19171208 ; [2] PMID: 27798121 ; [3] PMID: 23154403
Alteration of the Blood Retinal Barrier and increased vascular permeability	Matrix metalloproteinase-9	MMP9	P14780	1	[1] PMID: 25935789 ; [2] PMID: 19171208
Alteration of the Blood Retinal Barrier and increased vascular permeability	Mitogen-activated protein kinase 1	MAPK1	P28482	1	[1] PMID: 29850504
Alteration of the Blood Retinal Barrier and increased vascular permeability	Mitogen-activated protein kinase 11	MAPK11	Q15759	1	[1] PMID: 25829413
Alteration of the Blood Retinal Barrier and increased vascular permeability	Mitogen-activated protein kinase 12	MAPK12	P53778	1	[1] PMID: 25829413
Alteration of the Blood Retinal Barrier and increased vascular permeability	Mitogen-activated protein kinase 13	MAPK13	O15264	1	[1] PMID: 25829413
Alteration of the Blood Retinal Barrier and increased vascular permeability	Mitogen-activated protein kinase 14	MAPK14	Q16539	1	[1] PMID: 25829413
Alteration of the Blood Retinal Barrier and increased vascular permeability	Mitogen-activated protein kinase 3	MAPK3	P27361	1	[1] PMID: 29850504
Alteration of the Blood Retinal Barrier and increased vascular permeability	Neurogenic locus notch homolog protein 1	NOTCH1	P46531	1	[1] PMID: 30787185 ; [2] PMID: 30787185
Alteration of the Blood Retinal Barrier and increased vascular permeability	Neuropilin-1	NRP1	O14786	1	[1] dx.doi.org/10.1016/j.exer.2017.02.015
Alteration of the Blood Retinal Barrier and increased vascular permeability	Nitric oxide synthase, endothelial	NOS3	P29474	1	[1] doi.org/10.1016/j.preteyeres.2021.100954
Alteration of the Blood Retinal Barrier and increased vascular permeability	Occludin	OCLN	Q16625	-1	[1] PMID: 25935789
Alteration of the Blood Retinal Barrier and increased vascular permeability	Phosphatidylinositol 4,5-bisphosphate 3-kinase catalytic subunit gamma isoform	PIK3CG	P48736	1	[1] PMID: 29850504
Alteration of the Blood Retinal Barrier and increased vascular permeability	Pigment epithelium-derived factor	SERPINF1	P36955	-1	[1] doi.org/10.1016/j.preteyeres.2017.10.006
Alteration of the Blood Retinal Barrier and increased vascular permeability	Placenta growth factor	PGF	P49763	1	[1] doi.org/10.1007/s11010-020-03862-z ; [2] PMID: 20222885
Alteration of the Blood Retinal Barrier and increased vascular permeability	Platelet-derived growth factor subunit B	PDGFB	P01127	-1	[1] PMID: 25935789
Alteration of the Blood Retinal Barrier and increased vascular permeability	Protein jagged-1	JAG1	P78504	1	[1] PMID: 30787185
Alteration of the Blood Retinal Barrier and increased vascular permeability	Protein kinase C alpha type	PRKCA	P17252	1	[1] PMID: 19171208 ; [2] PMID: 22438576 ; [3] PMID: 24955234
Alteration of the Blood Retinal Barrier and increased vascular permeability	Protein kinase C beta type	PRKCB	P05771	1	[1] PMID: 19171208 ; [2] PMID: 22438576 ; [3] PMID: 24955234
Alteration of the Blood Retinal Barrier and increased vascular permeability	Protein kinase C delta type	PRKCD	Q05655	1	[1] PMID: 19171208 ; [2] PMID: 22438576 ; [3] PMID: 24955234
Alteration of the Blood Retinal Barrier and increased vascular permeability	Protein kinase C iota type	PRKCI	P41743	1	[1] PMID: 26607863 ; [2] PMID: 11258478
Alteration of the Blood Retinal Barrier and increased vascular permeability	Protein kinase C zeta type	PRKCZ	Q05513	1	[1] PMID: 26607863 ; [2] PMID: 11258478
Alteration of the Blood Retinal Barrier and increased vascular permeability	Proto-oncogene tyrosine-protein kinase Src	SRC	P12931	1	[1] PMID: 23416119 ; [2] PMID: 28619516 ; [3] PMID: 25935789
Alteration of the Blood Retinal Barrier and increased vascular permeability	Sodium/potassium-transporting ATPase subunit alpha-3	ATP1A3	P13637	-1	[1] PMID: 26113500 ; [2] PMID: 28615319
Alteration of the Blood Retinal Barrier and increased vascular permeability	Sodium/potassium-transporting ATPase subunit beta-2	ATP1B2	P14415	-1	[1] PMID: 26113500 ; [2] PMID: 28615319
Alteration of the Blood Retinal Barrier and increased vascular permeability	Sonic hedgehog protein	SHH	Q15465	-1	[1] doi.org/10.1016/j.exer.2017.09.012
Alteration of the Blood Retinal Barrier and increased vascular permeability	Tight junction protein ZO-1	TJP1	Q07157	-1	[1] PMID: 24955234
Alteration of the Blood Retinal Barrier and increased vascular permeability	Transforming growth factor beta-1 proprotein	TGFB1	P01137	1	[1] PMID: 25935789 ; [2] doi: 10.13140/RG.2.2.33706.85446 ; [3] doi.org/10.1007/s11010-020-03862-z
Alteration of the Blood Retinal Barrier and increased vascular permeability	Transforming growth factor-beta-induced protein ig-h3	TGFBI	Q15582	1	[1] doi.org/10.1016/j.preteyeres.2017.10.006
Alteration of the Blood Retinal Barrier and increased vascular permeability	Tyrosine-protein kinase receptor Tie-1	TIE1	P35590	-1	[1] PMID: 29473719
Alteration of the Blood Retinal Barrier and increased vascular permeability	Vascular endothelial growth factor A	VEGFA	P15692	1	[1] PMID: 29473719 ; [2] PMID: 24955234 ; [3] PMID: 23416119
Alteration of the Blood Retinal Barrier and increased vascular permeability	Vascular endothelial growth factor B	VEGFB	P49765	1	[1] DOI 10.1007/s10456-011-9249-6
Alteration of the Blood Retinal Barrier and increased vascular permeability	Vascular endothelial growth factor receptor 1	FLT1	P17948	1	[1] doi.org/10.1016/j.preteyeres.2021.100954 ; [2] DOI: 10.1159/000119877 ; [3] https://doi.org/10.1038/s41598-017-16499-8
Alteration of the Blood Retinal Barrier and increased vascular permeability	Vascular endothelial growth factor receptor 2	KDR	P35968	1	[1] PMID: 24955234 ; [2] https://doi.org/10.1038/s41598-017-16499-8 ; [3] PMID: 23416119
Alteration of the Blood Retinal Barrier and increased vascular permeability	Hepatocyte growth factor	HGF	P14210	1	[1] PMID: 20222885
Angiogenesis	1-phosphatidylinositol 4,5-bisphosphate phosphodiesterase gamma-1	PLCG1	P19174	1	[1] DOI: 10.1038/srep17946
Angiogenesis	1-phosphatidylinositol 4,5-bisphosphate phosphodiesterase gamma-2	PLCG2	P16885	1	[1] DOI: 10.1038/srep17946
Angiogenesis	72 kDa type IV collagenase	MMP2	P08253	1	[1] doi.org/10.1038/s12276-021-00566-2
Angiogenesis	Angiopoietin-1 receptor	TEK	Q02763	1	[1] doi: 10.1111/aos.13325 ; [2] PMID: 29473719
Angiogenesis	Angiopoietin-2	ANGPT2	O15123	-1	[1] doi: 10.1111/aos.13325 ; [2] PMID: 29473719
Angiogenesis	Apoptosis regulator Bcl-2	BCL2	P10415	1	[1] dx.doi.org/10.1016/j.exer.2017.02.015
Angiogenesis	Cell division control protein 42 homolog	CDC42	P60953	1	[1] doi: 10.1111/aos.13325
Angiogenesis	C-X-C chemokine receptor type 4	CXCR4	P61073	1	[1] doi: 10.1111/aos.13325
Angiogenesis	Delta-like protein 4	DLL4	Q9NR61	1	[1] doi: 10.1111/aos.13325 ; [2] PMID: 21989947
Angiogenesis	Erythropoietin receptor	EPOR	P19235	1	[1] doi: 10.1111/aos.13325
Angiogenesis	Fibroblast growth factor 2	FGF2	P09038	1	[1] doi.org/10.1038/sj.eye.6700133
Angiogenesis	Galectin-1	LGALS1	P09382	1	[1] dx.doi.org/10.1016/j.exer.2017.02.015 ; [2] DOI: 10.1080/02713683.2017.1403632
Angiogenesis	Hepatocyte growth factor	HGF	P14210	1	[1] PMID: 20222885
Angiogenesis	Hepatocyte growth factor receptor	MET	P08581	1	[1] doi.org/10.1038/sj.eye.6700133
Angiogenesis	Insulin-like growth factor I	IGF1	P05019	1	[1] doi.org/10.1038/sj.eye.6700133
Angiogenesis	Matrix metalloproteinase-9	MMP9	P14780	1	[1] doi.org/10.1038/s12276-021-00566-2
Angiogenesis	Netrin receptor UNC5B	UNC5B	Q8IZJ1	1	[1] doi: 10.1111/aos.13325
Angiogenesis	Netrin-1	NTN1	O95631	1	[1] doi: 10.1111/aos.13325
Angiogenesis	Neuropilin-1	NRP1	O14786	1	[1] doi.org/10.1016/j.preteyeres.2021.100954 ; [2] doi: 10.1111/aos.13325
Angiogenesis	Neuropilin-2	NRP2	O60462	1	[1] doi.org/10.1016/j.preteyeres.2021.100954
Angiogenesis	Phosphatidylinositol 4,5-bisphosphate 3-kinase catalytic subunit delta isoform	PIK3CD	O00329	1	[1] doi.org/10.2337/db19-0713
Angiogenesis	Pigment epithelium-derived factor	SERPINF1	P36955	-1	[1] doi.org/10.1038/sj.eye.6700133 ; [2] PMID: 16406543
Angiogenesis	Placenta growth factor	PGF	P49763	1	[1] doi.org/10.1016/j.preteyeres.2021.100954 ; [2] doi.org/10.1016/j.exer.2017.09.012
Angiogenesis	Platelet-derived growth factor subunit B	PDGFB	P01127	1	[1] doi.org/10.1038/sj.eye.6700133 ; [2] doi.org/10.1016/j.phrs.2015.11.027
Angiogenesis	Protein kinase C alpha type	PRKCA	P17252	1	[1] PMID: 19171208 ; [2] PMID: 14693793
Angiogenesis	Protein kinase C beta type	PRKCB	P05771	1	[1] PMID: 19171208 ; [2] PMID: 14693793
Angiogenesis	Protein kinase C delta type	PRKCD	Q05655	1	[1] PMID: 19171208 ; [2] PMID: 14693793
Angiogenesis	Ras-related C3 botulinum toxin substrate 1	RAC1	P63000	1	[1] doi: 10.1111/aos.13325
Angiogenesis	Roundabout homolog 4	ROBO4	Q8WZ75	1	[1] doi: 10.1111/aos.13325 ; [2] PMID: 31094072
Angiogenesis	Semaphorin-3A	SEMA3A	Q14563	1	[1] Agustin Cerani, Nicolas Tetreault, Francois Binet, Flavio Rezende, Nicholas Sitaras, Eric Lapalme, Sandra Favret, Fanny Guimont-Desrochers, Sylvie Lesage, Przemyslaw Sapieha; Semaphorin 3A Promotes Vascular Leakage in Diabetic Retinopathy. Invest. Ophthalmol. Vis. Sci. 2012;53(14):5780 ; [2] PMID: 23825919
Angiogenesis	Slit homolog 2 protein	SLIT2	O94813	1	[1] doi: 10.1111/aos.13325 ; [2] PMID: 28973045
Angiogenesis	Transforming growth factor beta-1 proprotein	TGFB	P01137	1	[1] doi.org/10.1007/s11010-020-03862-z
Angiogenesis	Tyrosine-protein kinase receptor Tie-1	TIE1	P35590	1	[1] PMID: 29473719
Angiogenesis	Vascular endothelial growth factor A	VEGFA	P15692	1	[1] doi.org/10.1016/j.preteyeres.2021.100954
Angiogenesis	Vascular endothelial growth factor B	VEGFB	P49765	1	[1] DOI 10.1007/s10456-011-9249-6
Angiogenesis	Vascular endothelial growth factor receptor 1	FLT1	P17948	1	[1] doi.org/10.1016/j.preteyeres.2021.100954
Angiogenesis	Vascular endothelial growth factor receptor 2	KDR	P35968	1	[1] doi.org/10.1016/j.preteyeres.2021.100954

## Sheet: S3
Supplementary Table S3. List of GO processes obtained through hypergeometric enrichment of model proteins. The obtained processes are classified into categories according to the broad diabetic macular edema process to which they are related. Gene Inset Intersection includes proteins with |predicted protein activity| greater than 0.8. FDR (false discovery rate) was set at p-value>0.01. Weakly repr…
SOURCE	SET_NAME	Cathegories	Original Set Size	InSet Intersection Size	p-value	FDR(adj p-value)	Gene InSet Intersection	Uniprot InSet Intersection
GO_BIOLOGICAL_PROCESS	regulation of focal adhesion assembly	Adhesion, cytoskeleton and junction	43	14	5.32131e-05	0.000513846	ABL1; ACTG1; KDR; MMP14; NRP1; PTK2; RAC1; RHOA; ROCK2; SLC9A1; SMAD3; SRC; TSC1; VEGFA	O14786; O75116; P00519; P12931; P15692; P19634; P35968; P50281; P61586; P63000; P63261; P84022; Q05397; Q92574
GO_BIOLOGICAL_PROCESS	regulation of protein binding	Adhesion, cytoskeleton and junction	132	29	4.40661e-05	0.000438467	ABL1; ACE; ACTB; AKT1; BAMBI; BAX; BDNF; CARM1; CDC42; CDKN1A; CRK; EP300; GSK3B; IL10; MAPK3; MAPK8; MMP9; NRP1; PPARA; PPP1CA; PPP2CA; PPP2CB; PRKCD; PSEN1; SRC; STK3; TERT; TIAM1; TNFSF11	O14746; O14786; O14788; P00519; P12821; P12931; P14780; P22301; P23560; P27361; P31749; P38936; P45983; P46108; P49768; P49841; P60709; P60953; P62136; P62714; P67775; Q05655; Q07812; Q07869; Q09472; Q13009; Q13145; Q13188; Q86X55
GO_BIOLOGICAL_PROCESS	regulation of muscle system process	Angiogenesis	157	33	3.45651e-05	0.000351714	ATP1A1; ATP1A2; ATP1B1; BIN1; EDN1; F2R; FOXO1; FOXO3; GATA4; GSK3A; HAMP; MTOR; MYLK2; NOS1; NPPA; PAK1; PIK3CG; PLCE1; PPARA; PPARGC1A; PRKAG3; PRKCA; PTGS2; PTK2; RHOA; ROCK2; SLC8A1; SLC9A1; SMAD3; SMAD4; SMAD7; SPHK1; TNFRSF1B	O00499; O15105; O43524; O75116; P01160; P05023; P05026; P05305; P17252; P19634; P20333; P25116; P29475; P32418; P35354; P42345; P43694; P48736; P49840; P50993; P61586; P81172; P84022; Q05397; Q07869; Q12778; Q13153; Q13485; Q9H1R3; Q9NYA1; Q9P212; Q9UBK2; Q9UGI9
GO_BIOLOGICAL_PROCESS	regulation of cardiac muscle hypertrophy	Angiogenesis	43	14	5.32131e-05	0.000513846	EDN1; FOXO1; GSK3A; HAMP; MTOR; PAK1; PPARA; PRKCA; PTK2; ROCK2; SLC9A1; SMAD3; SMAD4; TNFRSF1B	O75116; P05305; P17252; P19634; P20333; P42345; P49840; P81172; P84022; Q05397; Q07869; Q12778; Q13153; Q13485
GO_BIOLOGICAL_PROCESS	positive regulation of cell migration involved in sprouting angiogenesis	Angiogenesis	16	8	6.82439e-05	0.000629419	ABL1; AKT3; HMOX1; KDR; MAP3K3; NRP1; PTGS2; VEGFA	O14786; P00519; P09601; P15692; P35354; P35968; Q99759; Q9Y243
GO_BIOLOGICAL_PROCESS	positive regulation of blood vessel endothelial cell migration	Angiogenesis	48	22	2.21792e-10	5.80209e-09	ABL1; AKT1; AKT3; CD40; ETS1; HIF1A; HMOX1; HSPB1; KDR; MAP2K3; MAP3K3; MAPK14; NRP1; PDPK1; PLCG1; PRKCA; PRKD1; PRKD2; PTGS2; STAT5A; TGFB1; VEGFA	O14786; O15530; P00519; P01137; P04792; P09601; P14921; P15692; P17252; P19174; P25942; P31749; P35354; P35968; P42229; P46734; Q15139; Q16539; Q16665; Q99759; Q9BZL6; Q9Y243
GO_BIOLOGICAL_PROCESS	regulation of endothelial cell proliferation	Angiogenesis	100	33	3.17984e-10	8.11198e-09	AKT1; AKT3; BMPR2; CCL11; CCL2; CYBA; FLT1; GJA1; HIF1A; HMOX1; IL10; IL12B; ITGB3; JUN; KDR; LEP; MTOR; NRAS; NRP1; NRP2; PDPK1; PIK3CD; PLCG1; PRKCA; PRKD1; PRKD2; RPTOR; STAT1; STAT3; STAT5A; TNF; VEGFA; VEGFD	O00329; O14786; O15530; O43915; O60462; P01111; P01375; P05106; P05412; P09601; P13498; P13500; P15692; P17252; P17302; P17948; P19174; P22301; P29460; P31749; P35968; P40763; P41159; P42224; P42229; P42345; P51671; Q13873; Q15139; Q16665; Q8N122; Q9BZL6; Q9Y243
GO_BIOLOGICAL_PROCESS	regulation of endothelial cell migration	Angiogenesis	125	37	8.77892e-10	2.11931e-08	ABL1; AKT1; AKT3; BCAR1; BMPR2; CD40; EDN1; ETS1; HIF1A; HMOX1; HSPB1; ITGB3; KDR; MAP2K3; MAP3K3; MAPK14; NRP1; NRP2; PDPK1; PIK3CB; PIK3CD; PIK3CG; PLCG1; PRKCA; PRKD1; PRKD2; PTGS2; PTK2; PTK2B; RAC1; RHOA; ROCK2; RRAS; STAT5A; TGFB1; TNF; VEGFA	O00329; O14786; O15530; O60462; O75116; P00519; P01137; P01375; P04792; P05106; P05305; P09601; P10301; P14921; P15692; P17252; P19174; P25942; P31749; P35354; P35968; P42229; P42338; P46734; P48736; P56945; P61586; P63000; Q05397; Q13873; Q14289; Q15139; Q16539; Q16665; Q99759; Q9BZL6; Q9Y243
GO_BIOLOGICAL_PROCESS	positive regulation of angiogenesis	Angiogenesis	116	35	1.43926e-09	3.29746e-08	ABL1; CCL11; CD40; CXCL8; CXCR4; CYBB; ETS1; FLT1; GAB1; GATA4; HIF1A; HMOX1; HSPB1; IL10; ITGB2; JAK1; KDR; PAK4; PDPK1; PIK3CD; PIK3R6; PLCG1; PRKCA; PRKCB; PRKD1; PRKD2; PTK2B; RRAS; SERPINE1; SPHK1; STAT3; TERT; TWIST1; VEGFA; VEGFD	O00329; O14746; O15530; O43915; O96013; P00519; P04792; P04839; P05107; P05121; P05771; P09601; P10145; P10301; P14921; P15692; P17252; P17948; P19174; P22301; P23458; P25942; P35968; P40763; P43694; P51671; P61073; Q13480; Q14289; Q15139; Q15672; Q16665; Q5UE93; Q9BZL6; Q9NYA1
GO_BIOLOGICAL_PROCESS	positive regulation of vasculature development	Angiogenesis	116	35	1.43926e-09	3.29746e-08	ABL1; CCL11; CD40; CXCL8; CXCR4; CYBB; ETS1; FLT1; GAB1; GATA4; HIF1A; HMOX1; HSPB1; IL10; ITGB2; JAK1; KDR; PAK4; PDPK1; PIK3CD; PIK3R6; PLCG1; PRKCA; PRKCB; PRKD1; PRKD2; PTK2B; RRAS; SERPINE1; SPHK1; STAT3; TERT; TWIST1; VEGFA; VEGFD	O00329; O14746; O15530; O43915; O96013; P00519; P04792; P04839; P05107; P05121; P05771; P09601; P10145; P10301; P14921; P15692; P17252; P17948; P19174; P22301; P23458; P25942; P35968; P40763; P43694; P51671; P61073; Q13480; Q14289; Q15139; Q15672; Q16665; Q5UE93; Q9BZL6; Q9NYA1
GO_BIOLOGICAL_PROCESS	positive regulation of endothelial cell proliferation	Angiogenesis	71	26	2.01742e-09	4.47942e-08	AKT1; AKT3; BMPR2; CCL11; CYBA; HIF1A; HMOX1; IL10; ITGB3; JUN; KDR; MTOR; NRAS; NRP1; NRP2; PDPK1; PIK3CD; PLCG1; PRKCA; PRKD1; PRKD2; RPTOR; STAT3; STAT5A; VEGFA; VEGFD	O00329; O14786; O15530; O43915; O60462; P01111; P05106; P05412; P09601; P13498; P15692; P17252; P19174; P22301; P31749; P35968; P40763; P42229; P42345; P51671; Q13873; Q15139; Q16665; Q8N122; Q9BZL6; Q9Y243
GO_BIOLOGICAL_PROCESS	positive regulation of epithelial cell proliferation	Angiogenesis	136	38	3.17906e-09	6.84735e-08	AKT1; AKT3; BAD; BMPR1A; BMPR2; CCL11; CCL5; CDC42; CYBA; EGFR; HIF1A; HMOX1; HRAS; IL10; IQGAP3; ITGB3; JUN; KDR; MED1; MTOR; MYC; NRAS; NRP1; NRP2; PDPK1; PIK3CD; PLCG1; PRKCA; PRKD1; PRKD2; RPTOR; STAT3; STAT5A; TGFA; TNFAIP3; TWIST1; VEGFA; VEGFD	O00329; O14786; O15530; O43915; O60462; P00533; P01106; P01111; P01112; P01135; P05106; P05412; P09601; P13498; P13501; P15692; P17252; P19174; P21580; P22301; P31749; P35968; P36894; P40763; P42229; P42345; P51671; P60953; Q13873; Q15139; Q15648; Q15672; Q16665; Q86VI3; Q8N122; Q92934; Q9BZL6; Q9Y243
GO_BIOLOGICAL_PROCESS	regulation of angiogenesis	Angiogenesis	196	47	1.01905e-08	2.1188e-07	ABL1; ATF2; CCL11; CCR2; CD40; CREB3L1; CXCL10; CXCL8; CXCR4; CYBB; EGLN1; ETS1; FLT1; FOXO4; GAB1; GATA4; HIF1A; HMOX1; HSPB1; IL10; ITGB2; JAK1; KDR; LEP; PAK4; PDPK1; PIK3CB; PIK3CD; PIK3R6; PLCG1; PRKCA; PRKCB; PRKD1; PRKD2; PTK2B; ROCK2; RRAS; SERPINE1; SPHK1; STAT1; STAT3; TERT; TNF; TNFAIP3; TWIST1; VEGFA; VEGFD	O00329; O14746; O15530; O43915; O75116; O96013; P00519; P01375; P02778; P04792; P04839; P05107; P05121; P05771; P09601; P10145; P10301; P14921; P15336; P15692; P17252; P17948; P19174; P21580; P22301; P23458; P25942; P35968; P40763; P41159; P41597; P42224; P42338; P43694; P51671; P61073; P98177; Q13480; Q14289; Q15139; Q15672; Q16665; Q5UE93; Q96BA8; Q9BZL6; Q9GZT9; Q9NYA1
GO_BIOLOGICAL_PROCESS	regulation of vasculature development	Angiogenesis	198	47	1.44113e-08	2.93698e-07	ABL1; ATF2; CCL11; CCR2; CD40; CREB3L1; CXCL10; CXCL8; CXCR4; CYBB; EGLN1; ETS1; FLT1; FOXO4; GAB1; GATA4; HIF1A; HMOX1; HSPB1; IL10; ITGB2; JAK1; KDR; LEP; PAK4; PDPK1; PIK3CB; PIK3CD; PIK3R6; PLCG1; PRKCA; PRKCB; PRKD1; PRKD2; PTK2B; ROCK2; RRAS; SERPINE1; SPHK1; STAT1; STAT3; TERT; TNF; TNFAIP3; TWIST1; VEGFA; VEGFD	O00329; O14746; O15530; O43915; O75116; O96013; P00519; P01375; P02778; P04792; P04839; P05107; P05121; P05771; P09601; P10145; P10301; P14921; P15336; P15692; P17252; P17948; P19174; P21580; P22301; P23458; P25942; P35968; P40763; P41159; P41597; P42224; P42338; P43694; P51671; P61073; P98177; Q13480; Q14289; Q15139; Q15672; Q16665; Q5UE93; Q96BA8; Q9BZL6; Q9GZT9; Q9NYA1
GO_BIOLOGICAL_PROCESS	positive regulation of vascular smooth muscle cell proliferation	Angiogenesis	28	13	9.94208e-07	1.42761e-05	BMPR1A; EDN1; GJA1; GNAI2; GNAI3; IL10; JAK2; JUN; MMP2; MMP9; PAK1; TERT; TNF	O14746; O60674; P01375; P04899; P05305; P05412; P08253; P08754; P14780; P17302; P22301; P36894; Q13153
GO_BIOLOGICAL_PROCESS	positive regulation of smooth muscle cell proliferation	Angiogenesis	76	25	5.07089e-08	9.09725e-07	AKT1; BMPR1A; CCL5; CYBA; EDN1; EGFR; GJA1; GNAI2; GNAI3; HBEGF; HMOX1; IL10; JAK2; JUN; MMP2; MMP9; MTOR; NAMPT; NOX1; PAK1; PPARGC1A; PTGS2; STAT1; TERT; TNF	O14746; O60674; P00533; P01375; P04899; P05305; P05412; P08253; P08754; P09601; P13498; P13501; P14780; P17302; P22301; P31749; P35354; P36894; P42224; P42345; P43490; Q13153; Q99075; Q9UBK2; Q9Y5S8
GO_BIOLOGICAL_PROCESS	regulation of vascular smooth muscle cell proliferation	Angiogenesis	40	16	6.75557e-07	1.0146e-05	BMPR1A; CDKN1A; CDKN1B; EDN1; GJA1; GNAI2; GNAI3; HMOX1; IL10; JAK2; JUN; MMP2; MMP9; PAK1; TERT; TNF	O14746; O60674; P01375; P04899; P05305; P05412; P08253; P08754; P09601; P14780; P17302; P22301; P36894; P38936; P46527; Q13153
GO_BIOLOGICAL_PROCESS	regulation of smooth muscle cell proliferation	Angiogenesis	115	30	7.77378e-07	1.15308e-05	AKT1; BMPR1A; CCL5; CDKN1A; CDKN1B; CYBA; EDN1; EGFR; GJA1; GNAI2; GNAI3; HBEGF; HMOX1; IL10; IL12B; ILK; JAK2; JUN; MMP2; MMP9; MTOR; NAMPT; NOX1; PAK1; PPARGC1A; PTGS2; STAT1; TERT; TNF; TNFAIP3	O14746; O60674; P00533; P01375; P04899; P05305; P05412; P08253; P08754; P09601; P13498; P13501; P14780; P17302; P21580; P22301; P29460; P31749; P35354; P36894; P38936; P42224; P42345; P43490; P46527; Q13153; Q13418; Q99075; Q9UBK2; Q9Y5S8
GO_BIOLOGICAL_PROCESS	response to transforming growth factor beta	Angiogenesis	116	26	7.64179e-05	0.00069151	BAMBI; BMPR1A; CBL; CREB1; CRK; CRKL; EDN1; FOS; FYN; JUN; MAP3K7; NOX4; PARD3; PARD6A; PPARGC1A; PRKCZ; PTK2; PXN; RHOA; ROCK2; SMAD2; SMAD3; SMAD4; SMAD7; SRC; TGFB1	O15105; O43318; O75116; P01100; P01137; P05305; P05412; P06241; P12931; P16220; P22681; P36894; P46108; P46109; P49023; P61586; P84022; Q05397; Q05513; Q13145; Q13485; Q15796; Q8TEW0; Q9NPB6; Q9NPH5; Q9UBK2
GO_BIOLOGICAL_PROCESS	cellular response to transforming growth factor beta stimulus	Angiogenesis	111	25	9.63536e-05	0.00084947	BAMBI; BMPR1A; CBL; CREB1; CRK; CRKL; EDN1; FOS; FYN; JUN; MAP3K7; NOX4; PARD3; PARD6A; PPARGC1A; PRKCZ; PTK2; PXN; RHOA; SMAD2; SMAD3; SMAD4; SMAD7; SRC; TGFB1	O15105; O43318; P01100; P01137; P05305; P05412; P06241; P12931; P16220; P22681; P36894; P46108; P46109; P49023; P61586; P84022; Q05397; Q05513; Q13145; Q13485; Q15796; Q8TEW0; Q9NPB6; Q9NPH5; Q9UBK2
GO_BIOLOGICAL_PROCESS	vascular endothelial growth factor receptor signaling pathway	Angiogenesis	66	50	0	0	BAIAP2; BCAR1; BRK1; CDC42; CRK; CYBA; CYBB; CYFIP1; CYFIP2; DOCK1; FLT1; FYN; HSPB1; ITGAV; ITGB3; KDR; MAPK11; MAPK14; MAPKAPK2; MAPKAPK3; NCF1; NCF2; NCF4; NCK2; NCKAP1; NCKAP1L; NRP1; NRP2; PAK2; PIK3CA; PIK3CB; PIK3R1; PIK3R2; PRKD1; PRKD2; PTK2; PTK2B; PXN; RAC1; RHOA; ROCK2; SHB; SHC2; SRC; VAV1; VAV2; VAV3; VEGFA; VEGFD; WASF2	O00459; O14786; O43639; O43915; O60462; O75116; P04792; P04839; P05106; P06241; P06756; P12931; P13498; P14598; P15498; P15692; P17948; P19878; P27986; P35968; P42336; P42338; P46108; P49023; P49137; P52735; P55160; P56945; P60953; P61586; P63000; P98077; Q05397; Q13177; Q14185; Q14289; Q15080; Q15139; Q15464; Q15759; Q16539; Q16644; Q7L576; Q8WUW1; Q96F07; Q9BZL6; Q9UKW4; Q9UQB8; Q9Y2A7; Q9Y6W5
GO_BIOLOGICAL_PROCESS	vascular endothelial growth factor signaling pathway	Angiogenesis	21	12	1.4012e-07	2.37742e-06	FLT1; GAB1; HSPB1; KDR; NRP1; NRP2; PIK3CA; PIK3CD; PRKD1; PRKD2; VEGFA; VEGFD	O00329; O14786; O43915; O60462; P04792; P15692; P17948; P35968; P42336; Q13480; Q15139; Q9BZL6
GO_BIOLOGICAL_PROCESS	cellular response to vascular endothelial growth factor stimulus	Angiogenesis	37	18	3.02582e-09	6.57636e-08	AKT1; FLT1; GAB1; HSPB1; KDR; MAP2K3; MAPK14; MAPKAPK2; NRP1; NRP2; PIK3CA; PIK3CD; PRKD1; PRKD2; SPHK1; VCAM1; VEGFA; VEGFD	O00329; O14786; O43915; O60462; P04792; P15692; P17948; P19320; P31749; P35968; P42336; P46734; P49137; Q13480; Q15139; Q16539; Q9BZL6; Q9NYA1
GO_BIOLOGICAL_PROCESS	positive regulation of cell morphogenesis involved in differentiation	Remodelling, survival and endothelial damage	50	15	8.42266e-05	0.000756462	ABL1; BAIAP2; CDC42; CRK; CRKL; DNM2; DOCK1; EEF2K; ILK; NRP1; PAK3; PREX1; RAC1; RAC3; TIAM1	O00418; O14786; O75914; P00519; P46108; P46109; P50570; P60763; P60953; P63000; Q13009; Q13418; Q14185; Q8TCU6; Q9UQB8
GO_BIOLOGICAL_PROCESS	regulation of muscle hypertrophy	Remodelling, survival and endothelial damage	45	14	9.34074e-05	0.000826535	EDN1; FOXO1; GSK3A; HAMP; MTOR; PAK1; PPARA; PRKCA; PTK2; ROCK2; SLC9A1; SMAD3; SMAD4; TNFRSF1B	O75116; P05305; P17252; P19634; P20333; P42345; P49840; P81172; P84022; Q05397; Q07869; Q12778; Q13153; Q13485
GO_BIOLOGICAL_PROCESS	mammary gland epithelium development	Remodelling, survival and endothelial damage	45	14	9.34074e-05	0.000826535	AKT1; AKT2; CCL11; CEBPB; CSF1; ESR1; HIF1A; JAK2; MAPK1; MED1; SRC; STAT6; TBX3; TNFSF11	O14788; O15119; O60674; P03372; P09603; P12931; P17676; P28482; P31749; P31751; P42226; P51671; Q15648; Q16665
GO_BIOLOGICAL_PROCESS	regulation of developmental growth	Remodelling, survival and endothelial damage	198	45	1.19375e-07	2.07437e-06	ABL1; AKT1; BCL2; BCL2L11; BDNF; BMPR1A; BMPR2; CDK4; CDKN1A; CDKN1B; CREB1; CSF1; CXCR4; CYFIP1; DCC; DNM2; EDN1; EZR; GJA1; GSK3A; GSK3B; HAMP; ILK; INSR; LEP; LIMK1; MAPK1; MAPK11; MAPK14; MTOR; NRP1; PAK1; PIK3CA; PIM1; PLCB1; PPARA; PTK2; SLC6A3; SMAD7; STAT3; STAT5A; STAT5B; STK3; ULK2; VEGFA	O14786; O15105; O43521; P00519; P05305; P06213; P09603; P10415; P11309; P11802; P15311; P15692; P16220; P17302; P23560; P28482; P31749; P36894; P38936; P40763; P41159; P42229; P42336; P42345; P43146; P46527; P49840; P49841; P50570; P51692; P53667; P61073; P81172; Q01959; Q05397; Q07869; Q13153; Q13188; Q13418; Q13873; Q15759; Q16539; Q7L576; Q8IYT8; Q9NQ66
GO_BIOLOGICAL_PROCESS	regulation of blood vessel endothelial cell migration	Remodelling, survival and endothelial damage	77	24	2.97178e-07	4.72986e-06	ABL1; AKT1; AKT3; CD40; ETS1; HIF1A; HMOX1; HSPB1; KDR; MAP2K3; MAP3K3; MAPK14; NRP1; PDPK1; PLCG1; PRKCA; PRKD1; PRKD2; PTGS2; RHOA; STAT5A; TGFB1; TNF; VEGFA	O14786; O15530; P00519; P01137; P01375; P04792; P09601; P14921; P15692; P17252; P19174; P25942; P31749; P35354; P35968; P42229; P46734; P61586; Q15139; Q16539; Q16665; Q99759; Q9BZL6; Q9Y243
GO_BIOLOGICAL_PROCESS	positive regulation of epithelial cell apoptotic process	Remodelling, survival and endothelial damage	26	11	2.08253e-05	0.000226996	BAD; CCL2; CD40; CD40LG; FOXO3; GSN; JAK2; PLA2G1B; PLCG1; PPARGC1A; PRKCI	O43524; O60674; P04054; P06396; P13500; P19174; P25942; P29965; P41743; Q92934; Q9UBK2
GO_BIOLOGICAL_PROCESS	regulation of smooth muscle cell migration	Remodelling, survival and endothelial damage	46	15	2.82119e-05	0.000296287	ACE; BCL2; BMPR1A; CCL5; CRK; FOXO4; ILK; NOX4; NRP1; PAK1; PLAU; PPARGC1A; SERPINE1; SRC; TERT	O14746; O14786; P00749; P05121; P10415; P12821; P12931; P13501; P36894; P46108; P98177; Q13153; Q13418; Q9NPH5; Q9UBK2
GO_BIOLOGICAL_PROCESS	epithelial cell apoptotic process	Remodelling, survival and endothelial damage	23	10	3.7567e-05	0.000378927	ARF6; BCL2L1; BID; BMPR2; GSN; IL10; PIK3CG; RB1; STK3; TNF	P01375; P06396; P06400; P22301; P48736; P55957; P62330; Q07817; Q13188; Q13873
GO_BIOLOGICAL_PROCESS	positive regulation of developmental growth	Remodelling, survival and endothelial damage	109	27	8.06894e-06	9.56309e-05	AKT1; BCL2; BDNF; BMPR1A; BMPR2; CREB1; CSF1; CXCR4; CYFIP1; EDN1; EZR; HAMP; ILK; INSR; LEP; LIMK1; MAPK1; MAPK14; MTOR; NRP1; PAK1; PIM1; PLCB1; SLC6A3; SMAD7; STAT5B; VEGFA	O14786; O15105; P05305; P06213; P09603; P10415; P11309; P15311; P15692; P16220; P23560; P28482; P31749; P36894; P41159; P42345; P51692; P53667; P61073; P81172; Q01959; Q13153; Q13418; Q13873; Q16539; Q7L576; Q9NQ66
GO_BIOLOGICAL_PROCESS	negative regulation of apoptotic signaling pathway	Unclassified	166	39	3.45397e-07	5.44909e-06	AKT1; BAX; BCL2; BCL2L1; BDNF; BID; CREB3; CREB3L1; CSF2; EPO; FYN; GATA4; GNAI2; GNAI3; GSK3B; HIF1A; HMOX1; HSPB1; ICAM1; ITGAV; MCL1; MMP9; MUC1; NRP1; PAK5; PLAUR; PSEN1; PTGS2; RAF1; RB1; SERPINE1; SNAI1; SRC; TERT; TNF; TNFAIP3; TNFSF10; TRAF2; UNC5B	O14746; O14786; O43889; O95863; P01375; P01588; P04049; P04141; P04792; P04899; P05121; P05362; P06241; P06400; P06756; P08754; P09601; P10415; P12931; P14780; P15941; P21580; P23560; P31749; P35354; P43694; P49768; P49841; P50591; P55957; Q03405; Q07812; Q07817; Q07820; Q12933; Q16665; Q8IZJ1; Q96BA8; Q9P286
GO_BIOLOGICAL_PROCESS	extrinsic apoptotic signaling pathway in absence of ligand	Unclassified	30	14	3.47707e-07	5.46158e-06	BAD; BAX; BCL2; BCL2L1; BCL2L11; CASP3; CASP9; DCC; FOXO3; GSK3A; GSK3B; ITGAV; MCL1; MKNK2	O43521; O43524; P06756; P10415; P42574; P43146; P49840; P49841; P55211; Q07812; Q07817; Q07820; Q92934; Q9HBH9
GO_BIOLOGICAL_PROCESS	regulation of extrinsic apoptotic signaling pathway	Unclassified	129	30	1.00056e-05	0.000116285	AKT1; ATF3; BCL2; BCL2L1; BID; BMPR1B; CSF2; FYN; GSK3B; HMOX1; ICAM1; ITGAV; MCL1; NRP1; PAK2; PAK5; PMAIP1; PPP1CA; PPP2R1A; PPP2R1B; RAF1; SERPINE1; SRC; STK3; TERT; TNF; TNFAIP3; TNFSF10; TRAF2; UNC5B	O00238; O14746; O14786; P01375; P04049; P04141; P05121; P05362; P06241; P06756; P09601; P10415; P12931; P18847; P21580; P30153; P30154; P31749; P49841; P50591; P55957; P62136; Q07817; Q07820; Q12933; Q13177; Q13188; Q13794; Q8IZJ1; Q9P286
GO_BIOLOGICAL_PROCESS	extrinsic apoptotic signaling pathway	Unclassified	80	24	6.55238e-07	9.86148e-06	BAD; BAX; BCL2; BCL2L1; BCL2L11; BID; CASP3; CASP9; DCC; FOXO3; GSK3A; GSK3B; ITGAV; JAK2; MCL1; MKNK2; PDPK1; PIK3R1; RAF1; SMAD3; TGFB1; TNF; TNFRSF1B; TRAF2	O15530; O43521; O43524; O60674; P01137; P01375; P04049; P06756; P10415; P20333; P27986; P42574; P43146; P49840; P49841; P55211; P55957; P84022; Q07812; Q07817; Q07820; Q12933; Q92934; Q9HBH9
GO_BIOLOGICAL_PROCESS	intrinsic apoptotic signaling pathway	Unclassified	105	25	3.61102e-05	0.000366917	ABL1; ATF4; BAD; BAX; BCL2; BCL2L1; BCL2L11; BCL3; CASP3; CASP9; CDKN1A; CEBPB; DDIT4; EP300; HMOX1; HRAS; JAK2; MCL1; PDK1; PIK3R1; PMAIP1; PRKCD; TNF; TNFRSF1B; TRAF2	O43521; O60674; P00519; P01112; P01375; P09601; P10415; P17676; P18848; P20333; P20749; P27986; P38936; P42574; P55211; Q05655; Q07812; Q07817; Q07820; Q09472; Q12933; Q13794; Q15118; Q92934; Q9NX09
GO_BIOLOGICAL_PROCESS	positive regulation of apoptotic signaling pathway	Unclassified	98	23	9.36293e-05	0.00082748	ATF3; BAD; BAX; BCL2; BCL2L1; BCL2L11; BID; BMPR1B; MAPK9; MCL1; NCK2; NOX1; PAK2; PMAIP1; PPP1CA; PPP2R1A; PPP2R1B; PRKCD; SLC9A3R1; STK3; TNF; TNFSF10; TRAF2	O00238; O14745; O43521; O43639; P01375; P10415; P18847; P30153; P30154; P45984; P50591; P55957; P62136; Q05655; Q07812; Q07817; Q07820; Q12933; Q13177; Q13188; Q13794; Q92934; Q9Y5S8
GO_BIOLOGICAL_PROCESS	positive regulation of lamellipodium assembly	Adhesion, cytoskeleton and junction	18	11	1.84431e-07	3.07128e-06	BRK1; CDC42; DNM2; MTOR; NCKAP1; PIK3CA; PIK3R1; PLCE1; RAC1; RAC2; WASF2	P15153; P27986; P42336; P42345; P50570; P60953; P63000; Q8WUW1; Q9P212; Q9Y2A7; Q9Y6W5
GO_BIOLOGICAL_PROCESS	positive regulation of lamellipodium organization	Adhesion, cytoskeleton and junction	23	12	5.31533e-07	8.13584e-06	BRK1; CDC42; DNM2; MTOR; NCKAP1; PIK3CA; PIK3R1; PLCE1; RAC1; RAC2; SRC; WASF2	P12931; P15153; P27986; P42336; P42345; P50570; P60953; P63000; Q8WUW1; Q9P212; Q9Y2A7; Q9Y6W5
GO_BIOLOGICAL_PROCESS	regulation of Arp2/3 complex-mediated actin nucleation	Adhesion, cytoskeleton and junction	13	9	5.51541e-07	8.40633e-06	ABI2; BRK1; CYFIP1; NCKAP1; WAS; WASF1; WASF2; WASF3; WASL	O00401; P42768; Q7L576; Q8WUW1; Q92558; Q9NYB9; Q9UPY6; Q9Y2A7; Q9Y6W5
GO_BIOLOGICAL_PROCESS	regulation of cell projection assembly	Adhesion, cytoskeleton and junction	87	25	9.43554e-07	1.36304e-05	ARF6; BRK1; CCR7; CDC42; CYFIP1; DNM2; DNM3; HRAS; ICAM1; MTOR; NCKAP1; NRP1; PIK3CA; PIK3R1; PLCE1; PLD1; PRKCD; RAC1; RAC2; RHOQ; SRC; TBC1D7; WAS; WASF2; WASL	O00401; O14786; P01112; P05362; P12931; P15153; P17081; P27986; P32248; P42336; P42345; P42768; P50570; P60953; P62330; P63000; Q05655; Q13393; Q7L576; Q8WUW1; Q9P0N9; Q9P212; Q9UQ16; Q9Y2A7; Q9Y6W5
GO_BIOLOGICAL_PROCESS	positive regulation of plasma membrane bounded cell projection assembly	Adhesion, cytoskeleton and junction	51	18	1.21015e-06	1.71713e-05	BRK1; CCR7; CDC42; CYFIP1; DNM2; DNM3; HRAS; MTOR; NCKAP1; NRP1; PIK3CA; PIK3R1; PLCE1; RAC1; RAC2; RHOQ; WASF2; WASL	O00401; O14786; P01112; P15153; P17081; P27986; P32248; P42336; P42345; P50570; P60953; P63000; Q7L576; Q8WUW1; Q9P212; Q9UQ16; Q9Y2A7; Q9Y6W5
GO_BIOLOGICAL_PROCESS	regulation of lamellipodium assembly	Adhesion, cytoskeleton and junction	25	12	1.68624e-06	2.32838e-05	BRK1; CDC42; DNM2; MTOR; NCKAP1; PIK3CA; PIK3R1; PLCE1; RAC1; RAC2; WAS; WASF2	P15153; P27986; P42336; P42345; P42768; P50570; P60953; P63000; Q8WUW1; Q9P212; Q9Y2A7; Q9Y6W5
GO_BIOLOGICAL_PROCESS	regulation of plasma membrane bounded cell projection assembly	Adhesion, cytoskeleton and junction	86	24	2.7739e-06	3.64816e-05	ARF6; BRK1; CCR7; CDC42; CYFIP1; DNM2; DNM3; HRAS; ICAM1; MTOR; NCKAP1; NRP1; PIK3CA; PIK3R1; PLCE1; PLD1; PRKCD; RAC1; RAC2; RHOQ; TBC1D7; WAS; WASF2; WASL	O00401; O14786; P01112; P05362; P15153; P17081; P27986; P32248; P42336; P42345; P42768; P50570; P60953; P62330; P63000; Q05655; Q13393; Q7L576; Q8WUW1; Q9P0N9; Q9P212; Q9UQ16; Q9Y2A7; Q9Y6W5
GO_BIOLOGICAL_PROCESS	regulation of lamellipodium organization	Adhesion, cytoskeleton and junction	31	13	4.09855e-06	5.13675e-05	BRK1; CDC42; DNM2; MTOR; NCKAP1; PIK3CA; PIK3R1; PLCE1; RAC1; RAC2; SRC; WAS; WASF2	P12931; P15153; P27986; P42336; P42345; P42768; P50570; P60953; P63000; Q8WUW1; Q9P212; Q9Y2A7; Q9Y6W5
GO_BIOLOGICAL_PROCESS	regulation of podosome assembly	Adhesion, cytoskeleton and junction	13	8	9.0228e-06	0.000105545	CSF2; GSN; HCK; IL5; MAPK9; RHOA; SRC; TNF	P01375; P04141; P05113; P06396; P08631; P12931; P45984; P61586
GO_BIOLOGICAL_PROCESS	cortical actin cytoskeleton organization	Adhesion, cytoskeleton and junction	19	9	4.04845e-05	0.000403947	ARF6; EZR; IKBKB; NCKAP1; NCKAP1L; RHOQ; ROCK2; TLN1; TNF	O14920; O75116; P01375; P15311; P17081; P55160; P62330; Q9Y2A7; Q9Y490
GO_BIOLOGICAL_PROCESS	Rac protein signal transduction	Adhesion, cytoskeleton and junction	15	10	2.10901e-07	3.44824e-06	ABI2; BRK1; CYFIP1; FARP2; NCKAP1; RAC1; RAC2; TIAM1; WASF1; WASF2	O94887; P15153; P63000; Q13009; Q7L576; Q8WUW1; Q92558; Q9NYB9; Q9Y2A7; Q9Y6W5
GO_BIOLOGICAL_PROCESS	regulation of actin cytoskeleton organization	Adhesion, cytoskeleton and junction	194	60	3.33067e-16	1.66395e-14	ABI2; ABL1; ABL2; ACTG1; ARF6; ARPC1B; ARPC3; BAIAP2; BIN1; BRK1; CCL11; CCR7; CDC42; CRK; CYFIP1; CYFIP2; EDN1; EZR; GRB2; GSN; HCK; HRAS; ICAM1; ILK; IQGAP2; IQGAP3; LIMK1; MTOR; MYLK3; NCK2; NCKAP1; NCKAP1L; NOX4; NRP1; PAK1; PAK2; PAK3; PIK3CA; PIK3R1; PREX1; PRKCD; PRKCE; PTK2B; PXN; RAC1; RAC2; RAC3; RASA1; RHOA; RHOQ; ROCK2; SLC9A1; SMAD3; SMAD4; TSC1; WAS; WASF1; WASF2; WASF3; WASL	O00401; O00499; O14786; O15143; O15145; O43639; O75116; O75914; P00519; P01112; P05305; P05362; P06396; P08631; P15153; P15311; P17081; P19634; P20936; P27986; P32248; P42336; P42345; P42684; P42768; P46108; P49023; P51671; P53667; P55160; P60763; P60953; P61586; P62330; P62993; P63000; P63261; P84022; Q02156; Q05655; Q13153; Q13177; Q13418; Q13485; Q13576; Q14289; Q32MK0; Q7L576; Q86VI3; Q8TCU6;…
GO_BIOLOGICAL_PROCESS	regulation of actin filament organization	Adhesion, cytoskeleton and junction	147	48	3.81917e-14	1.50962e-12	ABI2; ABL1; ACTG1; ARF6; ARPC1B; ARPC3; BAIAP2; BIN1; BRK1; CCL11; CCR7; CDC42; CYFIP1; CYFIP2; GRB2; GSN; HCK; ICAM1; IQGAP2; LIMK1; MTOR; NCK2; NCKAP1; NCKAP1L; NOX4; NRP1; PAK1; PAK2; PAK3; PIK3CA; PIK3R1; PREX1; PRKCD; PRKCE; PTK2B; PXN; RAC1; RASA1; RHOA; ROCK2; SLC9A1; SMAD3; TSC1; WAS; WASF1; WASF2; WASF3; WASL	O00401; O00499; O14786; O15143; O15145; O43639; O75116; O75914; P00519; P05362; P06396; P08631; P19634; P20936; P27986; P32248; P42336; P42345; P42768; P49023; P51671; P53667; P55160; P60953; P61586; P62330; P62993; P63000; P63261; P84022; Q02156; Q05655; Q13153; Q13177; Q13576; Q14289; Q7L576; Q8TCU6; Q8WUW1; Q92558; Q92574; Q96F07; Q9NPH5; Q9NYB9; Q9UPY6; Q9UQB8; Q9Y2A7; Q9Y6W5
GO_BIOLOGICAL_PROCESS	positive regulation of actin filament polymerization	Adhesion, cytoskeleton and junction	52	27	3.85247e-14	1.51446e-12	ABI2; ARF6; ARPC1B; ARPC3; BAIAP2; BIN1; BRK1; CCL11; CCR7; CYFIP1; GRB2; GSN; HCK; ICAM1; IQGAP2; MTOR; NCK2; NCKAP1; NCKAP1L; PRKCE; PTK2B; RHOA; WAS; WASF1; WASF2; WASF3; WASL	O00401; O00499; O15143; O15145; O43639; P05362; P06396; P08631; P32248; P42345; P42768; P51671; P55160; P61586; P62330; P62993; Q02156; Q13576; Q14289; Q7L576; Q8WUW1; Q92558; Q9NYB9; Q9UPY6; Q9UQB8; Q9Y2A7; Q9Y6W5
GO_BIOLOGICAL_PROCESS	positive regulation of cytoskeleton organization	Adhesion, cytoskeleton and junction	125	42	5.47451e-13	1.95938e-11	ABI2; ABL1; ARF6; ARPC1B; ARPC3; BAIAP2; BIN1; BRK1; CCL11; CCR7; CDC42; CDKN1B; CYFIP1; EDN1; GRB2; GSN; HCK; HRAS; ICAM1; IQGAP2; LIMK1; MTOR; MYLK3; NCK2; NCKAP1; NCKAP1L; NOX4; NRP1; PAK1; PRKCE; PTK2B; PXN; RAC1; RHOA; ROCK2; SMAD3; TRPV4; WAS; WASF1; WASF2; WASF3; WASL	O00401; O00499; O14786; O15143; O15145; O43639; O75116; P00519; P01112; P05305; P05362; P06396; P08631; P32248; P42345; P42768; P46527; P49023; P51671; P53667; P55160; P60953; P61586; P62330; P62993; P63000; P84022; Q02156; Q13153; Q13576; Q14289; Q32MK0; Q7L576; Q8WUW1; Q92558; Q9HBA0; Q9NPH5; Q9NYB9; Q9UPY6; Q9UQB8; Q9Y2A7; Q9Y6W5
GO_BIOLOGICAL_PROCESS	regulation of actin filament polymerization	Adhesion, cytoskeleton and junction	86	32	1.60217e-11	4.96812e-10	ABI2; ARF6; ARPC1B; ARPC3; BAIAP2; BIN1; BRK1; CCL11; CCR7; CYFIP1; CYFIP2; GRB2; GSN; HCK; ICAM1; IQGAP2; MTOR; NCK2; NCKAP1; NCKAP1L; PAK3; PREX1; PRKCD; PRKCE; PTK2B; RASA1; RHOA; WAS; WASF1; WASF2; WASF3; WASL	O00401; O00499; O15143; O15145; O43639; O75914; P05362; P06396; P08631; P20936; P32248; P42345; P42768; P51671; P55160; P61586; P62330; P62993; Q02156; Q05655; Q13576; Q14289; Q7L576; Q8TCU6; Q8WUW1; Q92558; Q96F07; Q9NYB9; Q9UPY6; Q9UQB8; Q9Y2A7; Q9Y6W5
GO_BIOLOGICAL_PROCESS	regulation of actin polymerization or depolymerization	Adhesion, cytoskeleton and junction	94	33	4.81536e-11	1.36924e-09	ABI2; ARF6; ARPC1B; ARPC3; BAIAP2; BIN1; BRK1; CCL11; CCR7; CYFIP1; CYFIP2; GRB2; GSN; HCK; ICAM1; IQGAP2; MTOR; NCK2; NCKAP1; NCKAP1L; PAK3; PIK3CA; PREX1; PRKCD; PRKCE; PTK2B; RASA1; RHOA; WAS; WASF1; WASF2; WASF3; WASL	O00401; O00499; O15143; O15145; O43639; O75914; P05362; P06396; P08631; P20936; P32248; P42336; P42345; P42768; P51671; P55160; P61586; P62330; P62993; Q02156; Q05655; Q13576; Q14289; Q7L576; Q8TCU6; Q8WUW1; Q92558; Q96F07; Q9NYB9; Q9UPY6; Q9UQB8; Q9Y2A7; Q9Y6W5
GO_BIOLOGICAL_PROCESS	regulation of actin filament length	Adhesion, cytoskeleton and junction	94	33	4.81536e-11	1.36924e-09	ABI2; ARF6; ARPC1B; ARPC3; BAIAP2; BIN1; BRK1; CCL11; CCR7; CYFIP1; CYFIP2; GRB2; GSN; HCK; ICAM1; IQGAP2; MTOR; NCK2; NCKAP1; NCKAP1L; PAK3; PIK3CA; PREX1; PRKCD; PRKCE; PTK2B; RASA1; RHOA; WAS; WASF1; WASF2; WASF3; WASL	O00401; O00499; O15143; O15145; O43639; O75914; P05362; P06396; P08631; P20936; P32248; P42336; P42345; P42768; P51671; P55160; P61586; P62330; P62993; Q02156; Q05655; Q13576; Q14289; Q7L576; Q8TCU6; Q8WUW1; Q92558; Q96F07; Q9NYB9; Q9UPY6; Q9UQB8; Q9Y2A7; Q9Y6W5
GO_BIOLOGICAL_PROCESS	actin filament organization	Adhesion, cytoskeleton and junction	115	30	7.77378e-07	1.15308e-05	ABI2; ABL1; ARPC1B; ARPC3; BAIAP2; BCAR1; BCL2; BRK1; CCL11; CDC42; ENAH; EZR; GSN; IQGAP2; JAK2; NCK2; PLA2G1B; PREX1; PRKCI; PTK2B; RAC1; RAC2; RAC3; RHOA; SRC; TRPV4; WAS; WASF1; WASF3; WASL	O00401; O15143; O15145; O43639; O60674; P00519; P04054; P06396; P10415; P12931; P15153; P15311; P41743; P42768; P51671; P56945; P60763; P60953; P61586; P63000; Q13576; Q14289; Q8N8S7; Q8TCU6; Q8WUW1; Q92558; Q9HBA0; Q9NYB9; Q9UPY6; Q9UQB8
GO_BIOLOGICAL_PROCESS	positive regulation of actin nucleation	Adhesion, cytoskeleton and junction	11	10	1.1318e-09	2.66085e-08	ABI2; BRK1; CYFIP1; GSN; NCKAP1; WAS; WASF1; WASF2; WASF3; WASL	O00401; P06396; P42768; Q7L576; Q8WUW1; Q92558; Q9NYB9; Q9UPY6; Q9Y2A7; Q9Y6W5
GO_BIOLOGICAL_PROCESS	response to muscle stretch	Adhesion, cytoskeleton and junction	20	12	6.61335e-08	1.17183e-06	EDN1; FOS; GSN; JUN; MAPK14; NFKB1; NPPA; PIK3CA; PTK2; RAF1; SLC8A1; SLC9A1	P01100; P01160; P04049; P05305; P05412; P06396; P19634; P19838; P32418; P42336; Q05397; Q16539
GO_BIOLOGICAL_PROCESS	regulation of actomyosin structure organization	Adhesion, cytoskeleton and junction	62	22	6.98853e-08	1.23224e-06	ABL1; ACTG1; CDC42; EDN1; LIMK1; MTOR; MYLK3; NOX4; NRP1; PAK1; PAK2; PIK3R1; PXN; RAC1; RHOA; ROCK2; SLC9A1; SMAD3; SMAD4; TSC1; WAS; WASF2	O14786; O75116; P00519; P05305; P19634; P27986; P42345; P42768; P49023; P53667; P60953; P61586; P63000; P63261; P84022; Q13153; Q13177; Q13485; Q32MK0; Q92574; Q9NPH5; Q9Y6W5
GO_BIOLOGICAL_PROCESS	regulation of actin nucleation	Adhesion, cytoskeleton and junction	15	10	2.10901e-07	3.44824e-06	ABI2; BRK1; CYFIP1; GSN; NCKAP1; WAS; WASF1; WASF2; WASF3; WASL	O00401; P06396; P42768; Q7L576; Q8WUW1; Q92558; Q9NYB9; Q9UPY6; Q9Y2A7; Q9Y6W5
GO_BIOLOGICAL_PROCESS	cortical cytoskeleton organization	Adhesion, cytoskeleton and junction	32	14	9.28291e-07	1.34369e-05	ARF6; EZR; IKBKB; NCKAP1; NCKAP1L; RAC1; RAC2; RAC3; RHOA; RHOQ; ROCK2; TLN1; TNF; TRPV4	O14920; O75116; P01375; P15153; P15311; P17081; P55160; P60763; P61586; P62330; P63000; Q9HBA0; Q9Y2A7; Q9Y490
GO_BIOLOGICAL_PROCESS	regulation of actin filament bundle assembly	Adhesion, cytoskeleton and junction	60	19	3.98436e-06	5.01988e-05	ABL1; ACTG1; CDC42; LIMK1; MTOR; NOX4; NRP1; PAK1; PAK2; PIK3R1; PXN; RAC1; RHOA; ROCK2; SLC9A1; SMAD3; TSC1; WAS; WASF2	O14786; O75116; P00519; P19634; P27986; P42345; P42768; P49023; P53667; P60953; P61586; P63000; P63261; P84022; Q13153; Q13177; Q92574; Q9NPH5; Q9Y6W5
GO_BIOLOGICAL_PROCESS	actin filament polymerization	Adhesion, cytoskeleton and junction	15	8	3.74463e-05	0.000378355	GSN; JAK2; PREX1; RAC1; WAS; WASF1; WASF3; WASL	O00401; O60674; P06396; P42768; P63000; Q8TCU6; Q92558; Q9UPY6
GO_BIOLOGICAL_PROCESS	establishment of cell polarity	Adhesion, cytoskeleton and junction	65	18	5.49835e-05	0.000527402	ARF6; CCR7; CDC42; CRK; CRKL; DOCK2; EZR; GJA1; GSK3B; MOS; NDC80; PAK1; PARD3; PRKCI; PRKCZ; PTK2; RHOA; SLC9A3R1	O14745; O14777; P00540; P15311; P17302; P32248; P41743; P46108; P46109; P49841; P60953; P61586; P62330; Q05397; Q05513; Q13153; Q8TEW0; Q92608
GO_BIOLOGICAL_PROCESS	cellular carbohydrate metabolic process	Diabetic pathway_related	64	19	1.14833e-05	0.000131546	AKT1; AKT2; BRAF; G6PC; GSK3A; GSK3B; LEP; PLA2G4A; PPP1CA; PPP1CB; PPP1CC; PPP1R3A; PPP1R3B; PPP1R3C; PPP1R3D; PPP1R3E; PRKAG2; PRKAG3; SLC2A1	O95685; P11166; P15056; P31749; P31751; P35575; P36873; P41159; P47712; P49840; P49841; P62136; P62140; Q16821; Q86XI6; Q9H7J1; Q9UGI9; Q9UGJ0; Q9UQK1
GO_BIOLOGICAL_PROCESS	cellular response to glucagon stimulus	Diabetic pathway_related	22	10	2.33439e-05	0.000251778	ADCY1; ADCY2; ADCY3; ADCY4; ADCY5; ADCY6; ADCY7; ADCY8; ADCY9; ASS1	O43306; O60266; O60503; O95622; P00966; P40145; P51828; Q08462; Q08828; Q8NFM4
GO_BIOLOGICAL_PROCESS	response to glucose	Diabetic pathway_related	96	23	6.65284e-05	0.000621233	ADCY8; BAD; CASP3; CDKN1B; CYBA; EGR1; FOXO3; GATA4; GJA1; ICAM1; IRS2; LDHA; LGALS1; NOX4; PIK3CA; PPARGC1A; PRKAA1; PRKAA2; PTK2B; RAF1; RHOA; SLC8A1; SMAD2	O43524; P00338; P04049; P05362; P09382; P13498; P17302; P18146; P32418; P40145; P42336; P42574; P43694; P46527; P54646; P61586; Q13131; Q14289; Q15796; Q92934; Q9NPH5; Q9UBK2; Q9Y4H2
GO_BIOLOGICAL_PROCESS	regulation of glucose metabolic process	Diabetic pathway_related	73	25	2.02e-08	4.00328e-07	AKT1; AKT2; BAD; EP300; FOXA2; FOXO1; GNB3; GSK3A; GSK3B; INSR; IRS2; LEP; MTOR; PDK1; PMAIP1; PPARA; PPARGC1A; PPP1CA; PPP1CB; PPP1R3A; PPP1R3B; PPP1R3C; PPP1R3D; PPP1R3E; SRC	O95685; P06213; P12931; P16520; P31749; P31751; P41159; P42345; P49840; P49841; P62136; P62140; Q07869; Q09472; Q12778; Q13794; Q15118; Q16821; Q86XI6; Q92934; Q9H7J1; Q9UBK2; Q9UQK1; Q9Y261; Q9Y4H2
GO_BIOLOGICAL_PROCESS	carbohydrate metabolic process	Diabetic pathway_related	154	38	1.26011e-07	2.15327e-06	AKT1; AKT2; ATF3; ATF4; BAD; BRAF; CREM; CRTC2; G6PC; G6PC3; GSK3A; GSK3B; INSR; IRS2; LDHA; LEP; MAPK14; PDK1; PIK3CA; PLA2G4A; PPARGC1A; PPP1CA; PPP1CB; PPP1CC; PPP1R3A; PPP1R3B; PPP1R3C; PPP1R3D; PPP1R3E; PRKAA1; PRKAG2; PRKAG3; SLC2A1; SLC2A2; SLC2A4; SLC2A5; TFF1; TNF	O95685; P00338; P01375; P04155; P06213; P11166; P11168; P14672; P15056; P18847; P18848; P22732; P31749; P31751; P35575; P36873; P41159; P42336; P47712; P49840; P49841; P62136; P62140; Q03060; Q13131; Q15118; Q16539; Q16821; Q53ET0; Q86XI6; Q92934; Q9BUM1; Q9H7J1; Q9UBK2; Q9UGI9; Q9UGJ0; Q9UQK1; Q9Y4H2
GO_BIOLOGICAL_PROCESS	regulation of glucose transmembrane transport	Diabetic pathway_related	57	20	3.43225e-07	5.42673e-06	AKT1; AKT2; BRAF; EDN1; GSK3A; INSR; IRS2; LEP; MAPK14; PIK3R1; PLA2G1B; PRKAG2; PRKCB; PRKCI; PTPN11; RAP1A; RHOQ; SLC2A1; TERT; TNF	O14746; P01375; P04054; P05305; P05771; P06213; P11166; P15056; P17081; P27986; P31749; P31751; P41159; P41743; P49840; P62834; Q06124; Q16539; Q9UGJ0; Q9Y4H2
GO_BIOLOGICAL_PROCESS	regulation of glucose import	Diabetic pathway_related	43	16	2.12717e-06	2.87107e-05	AKT1; AKT2; GSK3A; INSR; IRS2; LEP; MAPK14; PIK3R1; PLA2G1B; PRKAG2; PRKCI; PTPN11; RAP1A; RHOQ; TERT; TNF	O14746; P01375; P04054; P06213; P17081; P27986; P31749; P31751; P41159; P41743; P49840; P62834; Q06124; Q16539; Q9UGJ0; Q9Y4H2
GO_BIOLOGICAL_PROCESS	positive regulation of glucose import	Diabetic pathway_related	29	11	7.00626e-05	0.000642537	AKT1; AKT2; INSR; IRS2; MAPK14; PIK3R1; PRKCI; PTPN11; RAP1A; RHOQ; TERT	O14746; P06213; P17081; P27986; P31749; P31751; P41743; P62834; Q06124; Q16539; Q9Y4H2
GO_BIOLOGICAL_PROCESS	positive regulation of glucose transmembrane transport	Diabetic pathway_related	35	12	0.00010366	0.000906111	AKT1; AKT2; BRAF; INSR; IRS2; MAPK14; PIK3R1; PRKCI; PTPN11; RAP1A; RHOQ; TERT	O14746; P06213; P15056; P17081; P27986; P31749; P31751; P41743; P62834; Q06124; Q16539; Q9Y4H2
GO_BIOLOGICAL_PROCESS	regulation of carbohydrate metabolic process	Diabetic pathway_related	124	37	6.82163e-10	1.68064e-08	AKT1; AKT2; BAD; DDIT4; EP300; FOXA2; FOXO1; GNB3; GSK3A; GSK3B; HIF1A; INSR; IRS2; LEP; MTOR; NFKB1; PDK1; PMAIP1; PPARA; PPARGC1A; PPP1CA; PPP1CB; PPP1R3A; PPP1R3B; PPP1R3C; PPP1R3D; PPP1R3E; PRKAA1; PRKAA2; PRKAG1; PRKAG2; PRKCE; PSEN1; PTK2B; SRC; STAT3; TGFB1	O95685; P01137; P06213; P12931; P16520; P19838; P31749; P31751; P40763; P41159; P42345; P49768; P49840; P49841; P54619; P54646; P62136; P62140; Q02156; Q07869; Q09472; Q12778; Q13131; Q13794; Q14289; Q15118; Q16665; Q16821; Q86XI6; Q92934; Q9H7J1; Q9NX09; Q9UBK2; Q9UGJ0; Q9UQK1; Q9Y261; Q9Y4H2
GO_BIOLOGICAL_PROCESS	regulation of cellular carbohydrate metabolic process	Diabetic pathway_related	93	29	1.6764e-08	3.38765e-07	AKT1; AKT2; BAD; DDIT4; EP300; FOXA2; FOXO1; GNB3; GSK3A; GSK3B; INSR; IRS2; LEP; MTOR; PDK1; PMAIP1; PPARA; PPARGC1A; PPP1CA; PPP1CB; PPP1R3A; PPP1R3B; PPP1R3C; PPP1R3D; PPP1R3E; PRKCE; PTK2B; SRC; STAT3	O95685; P06213; P12931; P16520; P31749; P31751; P40763; P41159; P42345; P49840; P49841; P62136; P62140; Q02156; Q07869; Q09472; Q12778; Q13794; Q14289; Q15118; Q16821; Q86XI6; Q92934; Q9H7J1; Q9NX09; Q9UBK2; Q9UQK1; Q9Y261; Q9Y4H2
GO_BIOLOGICAL_PROCESS	regulation of carbohydrate biosynthetic process	Diabetic pathway_related	67	22	3.37568e-07	5.36085e-06	AKT1; AKT2; EP300; FOXO1; GSK3A; GSK3B; INSR; IRS2; LEP; MTOR; NFKB1; PPARA; PPARGC1A; PPP1CA; PPP1CB; PPP1R3A; PPP1R3B; PPP1R3C; PPP1R3D; PPP1R3E; PTK2B; TGFB1	O95685; P01137; P06213; P19838; P31749; P31751; P41159; P42345; P49840; P49841; P62136; P62140; Q07869; Q09472; Q12778; Q14289; Q16821; Q86XI6; Q9H7J1; Q9UBK2; Q9UQK1; Q9Y4H2
GO_BIOLOGICAL_PROCESS	regulation of carbohydrate catabolic process	Diabetic pathway_related	51	17	5.90015e-06	7.15779e-05	DDIT4; EP300; GSK3A; HIF1A; INSR; PPARA; PPARGC1A; PPP1CA; PPP1CB; PPP1R3B; PPP1R3D; PRKAA1; PRKAA2; PRKAG1; PRKAG2; PSEN1; STAT3	O95685; P06213; P40763; P49768; P49840; P54619; P54646; P62136; P62140; Q07869; Q09472; Q13131; Q16665; Q86XI6; Q9NX09; Q9UBK2; Q9UGJ0
GO_BIOLOGICAL_PROCESS	positive regulation of carbohydrate metabolic process	Diabetic pathway_related	56	16	9.43361e-05	0.000832704	AKT1; AKT2; FOXO1; HIF1A; INSR; IRS2; NFKB1; PMAIP1; PPARA; PPARGC1A; PPP1R3E; PRKAA1; PRKAA2; PRKCE; PSEN1; SRC	P06213; P12931; P19838; P31749; P31751; P49768; P54646; Q02156; Q07869; Q12778; Q13131; Q13794; Q16665; Q9H7J1; Q9UBK2; Q9Y4H2
GO_BIOLOGICAL_PROCESS	response to glucagon	Diabetic pathways-related	29	11	7.00626e-05	0.000642537	ADCY1; ADCY2; ADCY3; ADCY4; ADCY5; ADCY6; ADCY7; ADCY8; ADCY9; ASS1; CREB1	O43306; O60266; O60503; O95622; P00966; P16220; P40145; P51828; Q08462; Q08828; Q8NFM4
GO_BIOLOGICAL_PROCESS	insulin receptor signaling pathway	Diabetic pathways-related	54	21	2.15027e-08	4.22652e-07	AKT1; AKT2; BAIAP2; BCAR1; FOXO1; FOXO4; GAB1; GRB2; GSK3A; GSK3B; INSR; IRS2; IRS4; NAMPT; PIK3CA; PIK3R1; PIK3R2; PIK3R3; RHOQ; SHC1; SOS1	O00459; O14654; P06213; P17081; P27986; P29353; P31749; P31751; P42336; P43490; P49840; P49841; P56945; P62993; P98177; Q07889; Q12778; Q13480; Q92569; Q9UQB8; Q9Y4H2
GO_BIOLOGICAL_PROCESS	response to insulin	Diabetic pathways-related	154	45	1.9712e-11	6.06018e-10	AKT1; AKT2; BAIAP2; BCAR1; CDK4; CYFIP1; EEF2K; EGR1; FOXO1; FOXO4; G6PC; GAB1; GRB2; GSK3A; GSK3B; ICAM1; IL10; INSR; IRS2; IRS4; LEP; MTOR; NAMPT; NPPA; PAK1; PDPK1; PIK3CA; PIK3R1; PIK3R2; PIK3R3; PLA2G1B; PPARA; PRKCI; PRKCZ; RHOQ; RPS6KB1; SHC1; SLC2A1; SLC2A4; SLC9A1; SOS1; SRC; TBC1D4; TNFSF10; TSC1	O00418; O00459; O14654; O15530; O60343; P01160; P04054; P05362; P06213; P11166; P11802; P12931; P14672; P17081; P18146; P19634; P22301; P23443; P27986; P29353; P31749; P31751; P35575; P41159; P41743; P42336; P42345; P43490; P49840; P49841; P50591; P56945; P62993; P98177; Q05513; Q07869; Q07889; Q12778; Q13153; Q13480; Q7L576; Q92569; Q92574; Q9UQB8; Q9Y4H2
GO_BIOLOGICAL_PROCESS	regulation of glycogen biosynthetic process	Diabetic pathways-related	25	14	1.73281e-08	3.47237e-07	AKT1; AKT2; GSK3A; GSK3B; INSR; IRS2; MTOR; PPP1CA; PPP1CB; PPP1R3A; PPP1R3B; PPP1R3C; PPP1R3D; PPP1R3E	O95685; P06213; P31749; P31751; P42345; P49840; P49841; P62136; P62140; Q16821; Q86XI6; Q9H7J1; Q9UQK1; Q9Y4H2
GO_BIOLOGICAL_PROCESS	regulation of glucan biosynthetic process	Diabetic pathways-related	25	14	1.73281e-08	3.47237e-07	AKT1; AKT2; GSK3A; GSK3B; INSR; IRS2; MTOR; PPP1CA; PPP1CB; PPP1R3A; PPP1R3B; PPP1R3C; PPP1R3D; PPP1R3E	O95685; P06213; P31749; P31751; P42345; P49840; P49841; P62136; P62140; Q16821; Q86XI6; Q9H7J1; Q9UQK1; Q9Y4H2
GO_BIOLOGICAL_PROCESS	regulation of glycogen metabolic process	Diabetic pathways-related	29	14	2.04361e-07	3.35655e-06	AKT1; AKT2; GSK3A; GSK3B; INSR; IRS2; MTOR; PPP1CA; PPP1CB; PPP1R3A; PPP1R3B; PPP1R3C; PPP1R3D; PPP1R3E	O95685; P06213; P31749; P31751; P42345; P49840; P49841; P62136; P62140; Q16821; Q86XI6; Q9H7J1; Q9UQK1; Q9Y4H2
GO_BIOLOGICAL_PROCESS	cellular response to insulin stimulus	Diabetic pathways-related	112	36	1.13373e-10	3.02077e-09	AKT1; AKT2; BAIAP2; BCAR1; CDK4; CYFIP1; EEF2K; FOXO1; FOXO4; G6PC; GAB1; GRB2; GSK3A; GSK3B; INSR; IRS2; IRS4; LEP; NAMPT; PAK1; PDPK1; PIK3CA; PIK3R1; PIK3R2; PIK3R3; PLA2G1B; PRKCI; PRKCZ; RHOQ; RPS6KB1; SHC1; SLC2A4; SLC9A1; SOS1; SRC; TBC1D4	O00418; O00459; O14654; O15530; O60343; P04054; P06213; P11802; P12931; P14672; P17081; P19634; P23443; P27986; P29353; P31749; P31751; P35575; P41159; P41743; P42336; P43490; P49840; P49841; P56945; P62993; P98177; Q05513; Q07889; Q12778; Q13153; Q13480; Q7L576; Q92569; Q9UQB8; Q9Y4H2
GO_BIOLOGICAL_PROCESS	cellular glucan metabolic process	Diabetic pathways-related	32	15	1.21647e-07	2.08363e-06	AKT1; AKT2; G6PC; GSK3A; GSK3B; PPP1CA; PPP1CB; PPP1CC; PPP1R3A; PPP1R3B; PPP1R3C; PPP1R3D; PPP1R3E; PRKAG2; PRKAG3	O95685; P31749; P31751; P35575; P36873; P49840; P49841; P62136; P62140; Q16821; Q86XI6; Q9H7J1; Q9UGI9; Q9UGJ0; Q9UQK1
GO_BIOLOGICAL_PROCESS	glucan metabolic process	Diabetic pathways-related	32	15	1.21647e-07	2.08363e-06	AKT1; AKT2; G6PC; GSK3A; GSK3B; PPP1CA; PPP1CB; PPP1CC; PPP1R3A; PPP1R3B; PPP1R3C; PPP1R3D; PPP1R3E; PRKAG2; PRKAG3	O95685; P31749; P31751; P35575; P36873; P49840; P49841; P62136; P62140; Q16821; Q86XI6; Q9H7J1; Q9UGI9; Q9UGJ0; Q9UQK1
GO_BIOLOGICAL_PROCESS	cellular response to carbohydrate stimulus	Diabetic pathways-related	57	19	1.66553e-06	2.30863e-05	ADCY8; CYBA; FOXO3; GATA4; ICAM1; IRS2; LEP; LGALS1; MAP2K4; MAP2K6; MAPK13; NOX4; PIK3CA; PPARGC1A; PRKAA1; PRKAA2; PRKCB; RAF1; SLC2A5	O15264; O43524; P04049; P05362; P05771; P09382; P13498; P22732; P40145; P41159; P42336; P43694; P45985; P52564; P54646; Q13131; Q9NPH5; Q9UBK2; Q9Y4H2
GO_BIOLOGICAL_PROCESS	response to monosaccharide	Diabetic pathways-related	106	27	4.5766e-06	5.60886e-05	ADCY8; BAD; CASP3; CDKN1B; CYBA; EGR1; FOXO3; GATA4; GJA1; ICAM1; IRS2; LDHA; LEP; LGALS1; NAMPT; NOX4; PIK3CA; PPARGC1A; PRKAA1; PRKAA2; PTGS2; PTK2B; RAF1; RHOA; SLC2A5; SLC8A1; SMAD2	O43524; P00338; P04049; P05362; P09382; P13498; P17302; P18146; P22732; P32418; P35354; P40145; P41159; P42336; P42574; P43490; P43694; P46527; P54646; P61586; Q13131; Q14289; Q15796; Q92934; Q9NPH5; Q9UBK2; Q9Y4H2
GO_BIOLOGICAL_PROCESS	cellular response to nutrient levels	Diabetic pathways-related	144	33	5.05145e-06	6.1698e-05	ATF3; ATF4; BCL2; BMPR2; CBL; CDKN1A; CDKN2B; FOXA2; FOXO1; FOXO3; HMOX1; ICAM1; JUN; LEP; MAPK1; MAPK3; MAPK8; MTOR; NAMPT; PIM1; PMAIP1; PPARA; PRKAA1; PRKAA2; PRKAG1; PRKAG2; PRKAG3; PRKD1; RPTOR; SLC2A1; TSC1; ULK1; UPP1	O43524; O75385; P05362; P05412; P09601; P10415; P11166; P11309; P18847; P18848; P22681; P27361; P28482; P38936; P41159; P42345; P42772; P43490; P45983; P54619; P54646; Q07869; Q12778; Q13131; Q13794; Q13873; Q15139; Q16831; Q8N122; Q92574; Q9UGI9; Q9UGJ0; Q9Y261
GO_BIOLOGICAL_PROCESS	regulation of insulin secretion	Diabetic pathways-related	115	26	6.54255e-05	0.000613652	ADCY5; ADCY8; ARNTL; BAD; CCL5; CD38; CFTR; CLOCK; CRH; FOXA2; GJA1; HIF1A; IRS2; JAK2; LEP; NOS2; PLA2G6; PRKCA; PRKCE; PTPN11; RAC1; RAP1A; SLC2A1; SLC2A2; TIAM1; TNF	O00327; O15516; O60674; O60733; O95622; P01375; P06850; P11166; P11168; P13501; P13569; P17252; P17302; P28907; P35228; P40145; P41159; P62834; P63000; Q02156; Q06124; Q13009; Q16665; Q92934; Q9Y261; Q9Y4H2
GO_BIOLOGICAL_PROCESS	regulation of insulin secretion involved in cellular response to glucose stimulus	Diabetic pathways-related	30	11	0.000100583	0.000882428	ADCY5; ADCY8; BAD; CFTR; CRH; FOXA2; HIF1A; PLA2G6; PRKCE; RAC1; TIAM1	O60733; O95622; P06850; P13569; P40145; P63000; Q02156; Q13009; Q16665; Q92934; Q9Y261
GO_BIOLOGICAL_PROCESS	cellular response to oxygen levels	Unclassified	151	41	1.9074e-09	4.24824e-08	AKT1; BAD; BCL2; CBL; CREBBP; CYBB; EDN1; EEF2K; EGLN1; EGLN2; EGLN3; EGR1; EP300; EPO; FOXO1; FOXO3; GNB1; GNGT1; HIF1A; HMOX1; ICAM1; KCNK3; MTOR; MYC; NAMPT; NDRG1; NOX1; PDK1; PMAIP1; PPARGC1A; PRKAA1; PRKCE; PTGS2; SLC2A4; SLC8A1; SLC9A1; SRC; TERT; TSC1; TWIST1; VEGFA	O00418; O14649; O14746; O43524; P01106; P01588; P04839; P05305; P05362; P09601; P10415; P12931; P14672; P15692; P18146; P19634; P22681; P31749; P32418; P35354; P42345; P43490; P62873; P63211; Q02156; Q09472; Q12778; Q13131; Q13794; Q15118; Q15672; Q16665; Q92574; Q92597; Q92793; Q92934; Q96KS0; Q9GZT9; Q9H6Z9; Q9UBK2; Q9Y5S8
GO_BIOLOGICAL_PROCESS	cellular response to decreased oxygen levels	Unclassified	141	39	2.69583e-09	5.8769e-08	AKT1; BAD; BCL2; CBL; CREBBP; CYBB; EDN1; EEF2K; EGLN1; EGLN2; EGLN3; EGR1; EP300; EPO; FOXO3; GNB1; GNGT1; HIF1A; HMOX1; ICAM1; KCNK3; MTOR; MYC; NAMPT; NDRG1; PDK1; PMAIP1; PPARGC1A; PRKAA1; PRKCE; PTGS2; SLC2A4; SLC8A1; SLC9A1; SRC; TERT; TSC1; TWIST1; VEGFA	O00418; O14649; O14746; O43524; P01106; P01588; P04839; P05305; P05362; P09601; P10415; P12931; P14672; P15692; P18146; P19634; P22681; P31749; P32418; P35354; P42345; P43490; P62873; P63211; Q02156; Q09472; Q13131; Q13794; Q15118; Q15672; Q16665; Q92574; Q92597; Q92793; Q92934; Q96KS0; Q9GZT9; Q9H6Z9; Q9UBK2
GO_BIOLOGICAL_PROCESS	cellular response to hypoxia	Unclassified	133	35	7.23067e-08	1.27182e-06	AKT1; BAD; BCL2; CREBBP; CYBB; EDN1; EGLN1; EGLN2; EGLN3; EGR1; EP300; EPO; FOXO3; GNB1; GNGT1; HIF1A; HMOX1; ICAM1; KCNK3; MTOR; MYC; NDRG1; PDK1; PMAIP1; PPARGC1A; PRKAA1; PRKCE; PTGS2; SLC2A4; SLC8A1; SLC9A1; SRC; TERT; TWIST1; VEGFA	O14649; O14746; O43524; P01106; P01588; P04839; P05305; P05362; P09601; P10415; P12931; P14672; P15692; P18146; P19634; P31749; P32418; P35354; P42345; P62873; P63211; Q02156; Q09472; Q13131; Q13794; Q15118; Q15672; Q16665; Q92597; Q92793; Q92934; Q96KS0; Q9GZT9; Q9H6Z9; Q9UBK2
GO_BIOLOGICAL_PROCESS	activation of innate General immune-related processes response	General immune-related processes	107	25	5.06425e-05	0.000492327	CARD9; CHUK; CREBBP; EP300; FYN; HCK; HRAS; IKBKB; IKBKG; KRAS; MAP3K7; MUC1; MUC4; NFKB1; NRAS; PAK1; PAK2; PAK3; PDPK1; PLCG2; PRKCD; RAF1; RPS6KA5; SRC; SYK	O14920; O15111; O15530; O43318; O75582; O75914; P01111; P01112; P01116; P04049; P06241; P08631; P12931; P15941; P16885; P19838; P43405; Q05655; Q09472; Q13153; Q13177; Q92793; Q99102; Q9H257; Q9Y6K9
GO_BIOLOGICAL_PROCESS	T cell receptor signaling pathway	General immune-related processes	122	30	2.97599e-06	3.87849e-05	ABL1; BCAR1; CHUK; CRKL; FOXP3; FYN; HRAS; IKBKB; IKBKG; ITK; LCP2; MAP3K7; MAPK1; NFKB1; PAK1; PAK2; PAK3; PDPK1; PIK3CA; PIK3CB; PIK3CD; PIK3R1; PIK3R2; PLCG1; PLCG2; PRKD2; PSEN1; TXK; WAS; ZAP70	O00329; O00459; O14920; O15111; O15530; O43318; O75914; P00519; P01112; P06241; P16885; P19174; P19838; P27986; P28482; P42336; P42338; P42681; P42768; P43403; P46109; P49768; P56945; Q08881; Q13094; Q13153; Q13177; Q9BZL6; Q9BZS1; Q9Y6K9
GO_BIOLOGICAL_PROCESS	Fc receptor signaling pathway	General immune-related processes	149	67	0	0	ABL1; ACTB; ACTG1; ARPC1B; ARPC3; BAIAP2; BRK1; BTK; CDC42; CHUK; CRK; CYFIP1; CYFIP2; DOCK1; FCGR1A; FCGR2A; FOS; FYN; GAB2; GRB2; HCK; IKBKB; IKBKG; ITK; JUN; LCP2; LIMK1; MAP2K4; MAP2K7; MAP3K1; MAP3K7; MAPK1; MAPK10; MAPK3; MAPK8; MAPK9; NCKAP1; NCKAP1L; NFATC1; NFATC2; NFATC3; NFKB1; PAK1; PAK2; PDPK1; PIK3CA; PIK3CB; PIK3R1; PIK3R2; PLA2G6; PLCG1; PLCG2; PLD2; PRKCD; PRKCE; PTK2; RAC1; SHC1…	O00401; O00459; O14733; O14920; O14939; O15111; O15143; O15145; O15530; O43318; O60733; O95644; P00519; P01100; P05412; P06241; P08631; P12314; P12318; P12931; P15498; P16885; P19174; P19838; P27361; P27986; P28482; P29353; P42336; P42338; P42768; P43405; P45983; P45984; P45985; P46108; P52735; P53667; P53779; P55160; P60709; P60953; P62993; P63000; P63261; Q02156; Q05397; Q05655; Q06187; Q07889;…
GO_BIOLOGICAL_PROCESS	Fc-gamma receptor signaling pathway	General immune-related processes	65	43	0	0	ABL1; ACTB; ACTG1; ARPC1B; ARPC3; BAIAP2; BRK1; CDC42; CRK; CYFIP1; CYFIP2; DOCK1; FCGR1A; FCGR2A; FYN; GRB2; HCK; LIMK1; MAPK1; MAPK3; NCKAP1; NCKAP1L; PAK1; PIK3CA; PIK3CB; PIK3R1; PIK3R2; PLA2G6; PLCG1; PLCG2; PLD2; PRKCD; PRKCE; PTK2; RAC1; SRC; SYK; VAV1; VAV2; VAV3; WAS; WASF2; WASL	O00401; O00459; O14939; O15143; O15145; O60733; P00519; P06241; P08631; P12314; P12318; P12931; P15498; P16885; P19174; P27361; P27986; P28482; P42336; P42338; P42768; P43405; P46108; P52735; P53667; P55160; P60709; P60953; P62993; P63000; P63261; Q02156; Q05397; Q05655; Q13153; Q14185; Q7L576; Q8WUW1; Q96F07; Q9UKW4; Q9UQB8; Q9Y2A7; Q9Y6W5
GO_BIOLOGICAL_PROCESS	phagocytosis	General immune-related processes	135	57	0	0	ABL1; ACTB; ACTG1; ARPC1B; ARPC3; BAIAP2; BRK1; CCR2; CDC42; CRK; CRP; CYFIP1; CYFIP2; DNM2; DOCK1; FCGR1A; FCGR2A; FYN; GRB2; GSN; HCK; ITGAV; ITGB2; ITGB3; LEP; LIMK1; MAPK1; MAPK3; MSR1; NCF2; NCF4; NCKAP1; NCKAP1L; PAK1; PIK3CA; PIK3CB; PIK3R1; PIK3R2; PIP5K1A; PIP5K1C; PLA2G6; PLCG1; PLCG2; PLD2; PRKCD; PRKCE; PTK2; RAC1; RAC2; SRC; SYK; VAV1; VAV2; VAV3; WAS; WASF2; WASL	O00401; O00459; O14939; O15143; O15145; O60331; O60733; P00519; P02741; P05106; P05107; P06241; P06396; P06756; P08631; P12314; P12318; P12931; P15153; P15498; P16885; P19174; P19878; P21757; P27361; P27986; P28482; P41159; P41597; P42336; P42338; P42768; P43405; P46108; P50570; P52735; P53667; P55160; P60709; P60953; P62993; P63000; P63261; Q02156; Q05397; Q05655; Q13153; Q14185; Q15080; Q7L576;…
GO_BIOLOGICAL_PROCESS	General immune-related processes response-regulating cell surface receptor signaling pathway involved in phagocytosis	General immune-related processes	63	43	0	0	ABL1; ACTB; ACTG1; ARPC1B; ARPC3; BAIAP2; BRK1; CDC42; CRK; CYFIP1; CYFIP2; DOCK1; FCGR1A; FCGR2A; FYN; GRB2; HCK; LIMK1; MAPK1; MAPK3; NCKAP1; NCKAP1L; PAK1; PIK3CA; PIK3CB; PIK3R1; PIK3R2; PLA2G6; PLCG1; PLCG2; PLD2; PRKCD; PRKCE; PTK2; RAC1; SRC; SYK; VAV1; VAV2; VAV3; WAS; WASF2; WASL	O00401; O00459; O14939; O15143; O15145; O60733; P00519; P06241; P08631; P12314; P12318; P12931; P15498; P16885; P19174; P27361; P27986; P28482; P42336; P42338; P42768; P43405; P46108; P52735; P53667; P55160; P60709; P60953; P62993; P63000; P63261; Q02156; Q05397; Q05655; Q13153; Q14185; Q7L576; Q8WUW1; Q96F07; Q9UKW4; Q9UQB8; Q9Y2A7; Q9Y6W5
GO_BIOLOGICAL_PROCESS	Fc-gamma receptor signaling pathway involved in phagocytosis	General immune-related processes	63	43	0	0	ABL1; ACTB; ACTG1; ARPC1B; ARPC3; BAIAP2; BRK1; CDC42; CRK; CYFIP1; CYFIP2; DOCK1; FCGR1A; FCGR2A; FYN; GRB2; HCK; LIMK1; MAPK1; MAPK3; NCKAP1; NCKAP1L; PAK1; PIK3CA; PIK3CB; PIK3R1; PIK3R2; PLA2G6; PLCG1; PLCG2; PLD2; PRKCD; PRKCE; PTK2; RAC1; SRC; SYK; VAV1; VAV2; VAV3; WAS; WASF2; WASL	O00401; O00459; O14939; O15143; O15145; O60733; P00519; P06241; P08631; P12314; P12318; P12931; P15498; P16885; P19174; P27361; P27986; P28482; P42336; P42338; P42768; P43405; P46108; P52735; P53667; P55160; P60709; P60953; P62993; P63000; P63261; Q02156; Q05397; Q05655; Q13153; Q14185; Q7L576; Q8WUW1; Q96F07; Q9UKW4; Q9UQB8; Q9Y2A7; Q9Y6W5
GO_BIOLOGICAL_PROCESS	Fc-epsilon receptor signaling pathway	General immune-related processes	99	39	9.65894e-15	4.18593e-13	BTK; CHUK; FOS; GAB2; GRB2; IKBKB; IKBKG; ITK; JUN; LCP2; MAP2K4; MAP2K7; MAP3K1; MAP3K7; MAPK1; MAPK10; MAPK3; MAPK8; MAPK9; NFATC1; NFATC2; NFATC3; NFKB1; PAK1; PAK2; PDPK1; PIK3CA; PIK3CB; PIK3R1; PIK3R2; PLCG1; PLCG2; RAC1; SHC1; SOS1; SYK; VAV1; VAV2; VAV3	O00459; O14733; O14920; O15111; O15530; O43318; O95644; P01100; P05412; P15498; P16885; P19174; P19838; P27361; P27986; P28482; P29353; P42336; P42338; P43405; P45983; P45984; P45985; P52735; P53779; P62993; P63000; Q06187; Q07889; Q08881; Q12968; Q13094; Q13153; Q13177; Q13233; Q13469; Q9UKW4; Q9UQC2; Q9Y6K9
GO_BIOLOGICAL_PROCESS	innate General immune-related processes response-activating signal transduction	General immune-related processes	89	25	1.50467e-06	2.10186e-05	CARD9; CHUK; CREBBP; EP300; FYN; HCK; HRAS; IKBKB; IKBKG; KRAS; MAP3K7; MUC1; MUC4; NFKB1; NRAS; PAK1; PAK2; PAK3; PDPK1; PLCG2; PRKCD; RAF1; RPS6KA5; SRC; SYK	O14920; O15111; O15530; O43318; O75582; O75914; P01111; P01112; P01116; P04049; P06241; P08631; P12931; P15941; P16885; P19838; P43405; Q05655; Q09472; Q13153; Q13177; Q92793; Q99102; Q9H257; Q9Y6K9
GO_BIOLOGICAL_PROCESS	positive regulation of T cell activation	General immune-related processes	167	41	4.58929e-08	8.29531e-07	AKT1; BAD; BCL6; CCL2; CCL5; CCR2; CCR7; CD40LG; CDC42; EPO; FOXP3; FYN; GRB2; IL12B; IL21; IL23A; JAK3; LEP; LGALS1; MAP3K8; NCK2; NCKAP1L; NLRP3; PAK1; PAK2; PAK3; PDPK1; PIK3CA; PIK3R1; PIK3R6; PRKCZ; PTPN11; RAC1; RHOA; SRC; STAT5B; SYK; TNFSF11; VAV1; VCAM1; ZAP70	O14788; O15530; O43639; O75914; P01588; P06241; P09382; P12931; P13500; P13501; P15498; P19320; P27986; P29460; P29965; P31749; P32248; P41159; P41182; P41279; P41597; P42336; P43403; P43405; P51692; P52333; P55160; P60953; P61586; P62993; P63000; Q05513; Q06124; Q13153; Q13177; Q5UE93; Q92934; Q96P20; Q9BZS1; Q9HBE4; Q9NPF7
GO_BIOLOGICAL_PROCESS	positive regulation of innate General immune-related processes response	General immune-related processes	143	35	4.96176e-07	7.65986e-06	CARD9; CCL5; CHUK; CREBBP; EP300; FYN; HCK; HRAS; IKBKB; IKBKG; IL12B; IL21; IRF3; IRF7; KRAS; MAP3K7; MED1; MUC1; MUC4; NFKB1; NRAS; PAK1; PAK2; PAK3; PDPK1; PLCG2; PRKCD; RAF1; RASGRP1; RPS6KA5; SRC; STAT5B; SYK; TXK; VAV1	O14920; O15111; O15530; O43318; O75582; O75914; O95267; P01111; P01112; P01116; P04049; P06241; P08631; P12931; P13501; P15498; P15941; P16885; P19838; P29460; P42681; P43405; P51692; Q05655; Q09472; Q13153; Q13177; Q14653; Q15648; Q92793; Q92985; Q99102; Q9H257; Q9HBE4; Q9Y6K9
GO_BIOLOGICAL_PROCESS	positive regulation of B cell activation	General immune-related processes	61	20	1.19392e-06	1.69745e-05	BAD; BCL2; BCL6; BTK; CD38; CD40; CDKN1A; IL10; IL21; IL5; IRS2; MMP14; NCKAP1L; NFATC2; STAT5B; STAT6; SYK; TBX21; TGFB1; VAV3	P01137; P05113; P10415; P22301; P25942; P28907; P38936; P41182; P42226; P43405; P50281; P51692; P55160; Q06187; Q13469; Q92934; Q9HBE4; Q9UKW4; Q9UL17; Q9Y4H2
GO_BIOLOGICAL_PROCESS	innate General immune-related processes response activating cell surface receptor signaling pathway	General immune-related processes	88	24	4.32504e-06	5.36989e-05	CARD9; CHUK; CREBBP; EP300; FYN; HRAS; IKBKB; IKBKG; KRAS; MAP3K7; MUC1; MUC4; NFKB1; NRAS; PAK1; PAK2; PAK3; PDPK1; PLCG2; PRKCD; RAF1; RPS6KA5; SRC; SYK	O14920; O15111; O15530; O43318; O75582; O75914; P01111; P01112; P01116; P04049; P06241; P12931; P15941; P16885; P19838; P43405; Q05655; Q09472; Q13153; Q13177; Q92793; Q99102; Q9H257; Q9Y6K9
GO_BIOLOGICAL_PROCESS	lymphocyte homeostasis	General immune-related processes	38	15	1.85486e-06	2.54551e-05	ABL1; AKT1; BAX; BCL2; BCL2L11; CASP3; FOXP3; HIF1A; JAK3; NCKAP1L; PMAIP1; RPS6; SOS1; STAT5B; TNFAIP3	O43521; P00519; P10415; P21580; P31749; P42574; P51692; P52333; P55160; P62753; Q07812; Q07889; Q13794; Q16665; Q9BZS1
GO_BIOLOGICAL_PROCESS	regulation of lymphocyte mediated immunity	General immune-related processes	97	26	2.46277e-06	3.29316e-05	BCL6; BTK; CCR2; CD40; CRK; FOXP3; IL10; IL12B; IL21; IL23A; LEP; MAP3K7; NLRP3; PIK3R6; PRKCZ; RASGRP1; SMAD7; STAT5B; STAT6; TBX21; TGFB1; TNF; TNFRSF1B; TRAF2; VAV1; WAS	O15105; O43318; O95267; P01137; P01375; P15498; P20333; P22301; P25942; P29460; P41159; P41182; P41597; P42226; P42768; P46108; P51692; Q05513; Q06187; Q12933; Q5UE93; Q96P20; Q9BZS1; Q9HBE4; Q9NPF7; Q9UL17
GO_BIOLOGICAL_PROCESS	T cell activation	General immune-related processes	173	38	2.90269e-06	3.79673e-05	ABL1; BAX; BCL2; CCND3; CCR7; CDK6; DOCK2; EGR1; FOXP3; FYN; ICAM1; IFNA21; IFNA7; IL12B; IL21; IL23A; IRF1; IRF4; ITK; LEP; NCK2; PIK3CD; PIK3CG; PREX1; PSEN1; RASGRP1; RHOA; RPS6; SMAD3; STAT3; STAT5B; STAT6; SYK; TBX21; TSC1; VAV1; WAS; ZAP70	O00329; O43639; O95267; P00519; P01567; P01568; P05362; P06241; P10415; P10914; P15498; P18146; P29460; P30281; P32248; P40763; P41159; P42226; P42768; P43403; P43405; P48736; P49768; P51692; P61586; P62753; P84022; Q00534; Q07812; Q08881; Q15306; Q8TCU6; Q92574; Q92608; Q9BZS1; Q9HBE4; Q9NPF7; Q9UL17
GO_BIOLOGICAL_PROCESS	lymphocyte differentiation	General immune-related processes	181	39	3.5383e-06	4.50523e-05	ABL1; BAX; BCL2; BCL6; BTK; CCR7; CD40LG; CDK6; DOCK2; EGR1; EP300; FOXP3; IFNA21; IFNA7; IL10; IL12B; IL21; IRF1; IRF4; ITK; JAK3; LEP; LGALS1; PIK3CD; PIK3R1; PLCG2; PREX1; PTK2B; RHOA; RPS6; STAT3; STAT5B; STAT6; SYK; TBX21; TSC1; VAV1; VCAM1; ZAP70	O00329; P00519; P01567; P01568; P09382; P10415; P10914; P15498; P16885; P18146; P19320; P22301; P27986; P29460; P29965; P32248; P40763; P41159; P41182; P42226; P43403; P43405; P51692; P52333; P61586; P62753; Q00534; Q06187; Q07812; Q08881; Q09472; Q14289; Q15306; Q8TCU6; Q92574; Q92608; Q9BZS1; Q9HBE4; Q9UL17
GO_BIOLOGICAL_PROCESS	positive regulation of mononuclear cell proliferation	General immune-related processes	110	26	2.89569e-05	0.000301299	BCL2; BCL6; CCL5; CCR2; CD38; CD40; CD40LG; CDKN1A; CSF1; EPO; FOXP3; IL12B; IL21; IL23A; IL5; IRS2; JAK3; LEP; NCK2; NCKAP1L; NFATC2; STAT5B; SYK; VAV3; VCAM1; ZAP70	O43639; P01588; P05113; P09603; P10415; P13501; P19320; P25942; P28907; P29460; P29965; P38936; P41159; P41182; P41597; P43403; P43405; P51692; P52333; P55160; Q13469; Q9BZS1; Q9HBE4; Q9NPF7; Q9UKW4; Q9Y4H2
GO_BIOLOGICAL_PROCESS	regulation of lymphocyte proliferation	General immune-related processes	166	34	4.62087e-05	0.000456001	BCL2; BCL6; BTK; CASP3; CCL5; CCR2; CD38; CD40; CD40LG; CDKN1A; CEBPB; EPO; FOXP3; IL10; IL12B; IL21; IL23A; IL5; IRF1; IRS2; ITCH; JAK3; LEP; NCK2; NCKAP1L; NFATC2; RAC2; SOS1; STAT5B; SYK; TNFRSF1B; VAV3; VCAM1; ZAP70	O43639; P01588; P05113; P10415; P10914; P13501; P15153; P17676; P19320; P20333; P22301; P25942; P28907; P29460; P29965; P38936; P41159; P41182; P41597; P42574; P43403; P43405; P51692; P52333; P55160; Q06187; Q07889; Q13469; Q96J02; Q9BZS1; Q9HBE4; Q9NPF7; Q9UKW4; Q9Y4H2
GO_BIOLOGICAL_PROCESS	positive regulation of General immune-related processes effector process	General immune-related processes	146	31	4.86554e-05	0.000476227	CCR2; CD40; FOXP3; GAB2; HMOX1; IL10; IL12B; IL21; IL23A; IL5; ITGB2; MAP3K7; MAPK14; MAPK3; NLRP3; NOS2; NPPA; PRKCZ; RAC2; RAP1A; RAPGEF1; RASGRP1; SPHK2; STAT5B; STAT6; SYK; TBX21; TGFB1; TNF; TRAF2; VAV1	O43318; O95267; P01137; P01160; P01375; P05107; P05113; P09601; P15153; P15498; P22301; P25942; P27361; P29460; P35228; P41597; P42226; P43405; P51692; P62834; Q05513; Q12933; Q13905; Q16539; Q96P20; Q9BZS1; Q9HBE4; Q9NPF7; Q9NRA0; Q9UL17; Q9UQC2
GO_BIOLOGICAL_PROCESS	positive regulation of lymphocyte proliferation	General immune-related processes	109	25	7.02306e-05	0.000642537	BCL2; BCL6; CCL5; CCR2; CD38; CD40; CD40LG; CDKN1A; EPO; FOXP3; IL12B; IL21; IL23A; IL5; IRS2; JAK3; LEP; NCK2; NCKAP1L; NFATC2; STAT5B; SYK; VAV3; VCAM1; ZAP70	O43639; P01588; P05113; P10415; P13501; P19320; P25942; P28907; P29460; P29965; P38936; P41159; P41182; P41597; P43403; P43405; P51692; P52333; P55160; Q13469; Q9BZS1; Q9HBE4; Q9NPF7; Q9UKW4; Q9Y4H2
GO_BIOLOGICAL_PROCESS	antigen receptor-mediated signaling pathway	General immune-related processes	146	39	7.98528e-09	1.67971e-07	ABL1; BAX; BCAR1; BCL2; BTK; CD38; CHUK; CRKL; FOXP3; FYN; HRAS; IKBKB; IKBKG; ITK; LCP2; MAP3K7; MAPK1; NCKAP1L; NFATC2; NFKB1; PAK1; PAK2; PAK3; PDPK1; PIK3CA; PIK3CB; PIK3CD; PIK3R1; PIK3R2; PLCG1; PLCG2; PRKCB; PRKD2; PSEN1; SYK; TXK; VAV3; WAS; ZAP70	O00329; O00459; O14920; O15111; O15530; O43318; O75914; P00519; P01112; P05771; P06241; P10415; P16885; P19174; P19838; P27986; P28482; P28907; P42336; P42338; P42681; P42768; P43403; P43405; P46109; P49768; P55160; P56945; Q06187; Q07812; Q08881; Q13094; Q13153; Q13177; Q13469; Q9BZL6; Q9BZS1; Q9UKW4; Q9Y6K9
GO_BIOLOGICAL_PROCESS	B cell receptor signaling pathway	General immune-related processes	32	15	1.21647e-07	2.08363e-06	ABL1; BAX; BCAR1; BCL2; BTK; CD38; ITK; MAPK1; NCKAP1L; NFATC2; PIK3CD; PLCG2; PRKCB; SYK; VAV3	O00329; P00519; P05771; P10415; P16885; P28482; P28907; P43405; P55160; P56945; Q06187; Q07812; Q08881; Q13469; Q9UKW4
GO_BIOLOGICAL_PROCESS	cellular response to lipopolysaccharide	General immune-related processes	142	38	1.18523e-08	2.44313e-07	ABL1; AKT1; ASS1; CCL2; CCL3; CCL5; CD40; CDK4; CEBPB; CSF2; CXCL1; CXCL10; CXCL2; CXCL3; CXCL8; HAMP; HCK; ICAM1; IL10; IL12B; IRF3; MAPK1; MAPK14; MAPK3; MAPK8; NFKB1; NFKBIB; NLRP3; NOS2; PPARGC1A; PRKCE; RHOA; SERPINE1; SRC; TGFB1; TNF; TNFAIP3; TNFRSF1B	P00519; P00966; P01137; P01375; P02778; P04141; P05121; P05362; P08631; P09341; P10145; P10147; P11802; P12931; P13500; P13501; P17676; P19838; P19875; P19876; P20333; P21580; P22301; P25942; P27361; P28482; P29460; P31749; P35228; P45983; P61586; P81172; Q02156; Q14653; Q15653; Q16539; Q96P20; Q9UBK2
GO_BIOLOGICAL_PROCESS	cellular response to molecule of bacterial origin	General immune-related processes	148	38	4.02966e-08	7.33909e-07	ABL1; AKT1; ASS1; CCL2; CCL3; CCL5; CD40; CDK4; CEBPB; CSF2; CXCL1; CXCL10; CXCL2; CXCL3; CXCL8; HAMP; HCK; ICAM1; IL10; IL12B; IRF3; MAPK1; MAPK14; MAPK3; MAPK8; NFKB1; NFKBIB; NLRP3; NOS2; PPARGC1A; PRKCE; RHOA; SERPINE1; SRC; TGFB1; TNF; TNFAIP3; TNFRSF1B	P00519; P00966; P01137; P01375; P02778; P04141; P05121; P05362; P08631; P09341; P10145; P10147; P11802; P12931; P13500; P13501; P17676; P19838; P19875; P19876; P20333; P21580; P22301; P25942; P27361; P28482; P29460; P31749; P35228; P45983; P61586; P81172; Q02156; Q14653; Q15653; Q16539; Q96P20; Q9UBK2
GO_BIOLOGICAL_PROCESS	T cell homeostasis	General immune-related processes	21	11	1.53329e-06	2.13769e-05	AKT1; BAX; BCL2; BCL2L11; CASP3; FOXP3; JAK3; NCKAP1L; PMAIP1; RPS6; STAT5B	O43521; P10415; P31749; P42574; P51692; P52333; P55160; P62753; Q07812; Q13794; Q9BZS1
GO_BIOLOGICAL_PROCESS	B cell homeostasis	General immune-related processes	19	10	4.43342e-06	5.45198e-05	ABL1; BAX; BCL2; BCL2L11; CASP3; FOXP3; HIF1A; NCKAP1L; SOS1; TNFAIP3	O43521; P00519; P10415; P21580; P42574; P55160; Q07812; Q07889; Q16665; Q9BZS1
GO_BIOLOGICAL_PROCESS	regulation of macrophage derived foam cell differentiation	General immune-related processes	24	11	8.14401e-06	9.63619e-05	CRP; CSF1; CSF2; ITGAV; ITGB3; MAPK9; MSR1; NFKB1; NFKBIA; PLA2G2A; PPARA	P02741; P04141; P05106; P06756; P09603; P14555; P19838; P21757; P25963; P45984; Q07869
GO_BIOLOGICAL_PROCESS	regulation of B cell activation	General immune-related processes	89	23	1.80953e-05	0.000199048	BAD; BCL2; BCL6; BTK; CASP3; CD38; CD40; CDKN1A; FOXP3; IL10; IL21; IL5; IRS2; MMP14; NCKAP1L; NFATC2; STAT5B; STAT6; SYK; TBX21; TGFB1; TNFAIP3; VAV3	P01137; P05113; P10415; P21580; P22301; P25942; P28907; P38936; P41182; P42226; P42574; P43405; P50281; P51692; P55160; Q06187; Q13469; Q92934; Q9BZS1; Q9HBE4; Q9UKW4; Q9UL17; Q9Y4H2
GO_BIOLOGICAL_PROCESS	alpha-beta T cell differentiation	General immune-related processes	35	13	1.99465e-05	0.000218742	ABL1; BCL2; FOXP3; IL12B; IL21; IRF1; IRF4; ITK; RHOA; STAT3; STAT6; SYK; ZAP70	P00519; P10415; P10914; P29460; P40763; P42226; P43403; P43405; P61586; Q08881; Q15306; Q9BZS1; Q9HBE4
GO_BIOLOGICAL_PROCESS	T cell differentiation	General immune-related processes	104	25	3.03594e-05	0.00031335	ABL1; BCL2; CCR7; CDK6; DOCK2; EGR1; FOXP3; IL12B; IL21; IRF1; IRF4; ITK; LEP; PIK3CD; PREX1; RHOA; RPS6; STAT3; STAT5B; STAT6; SYK; TBX21; TSC1; VAV1; ZAP70	O00329; P00519; P10415; P10914; P15498; P18146; P29460; P32248; P40763; P41159; P42226; P43403; P43405; P51692; P61586; P62753; Q00534; Q08881; Q15306; Q8TCU6; Q92574; Q92608; Q9BZS1; Q9HBE4; Q9UL17
GO_BIOLOGICAL_PROCESS	cellular response to interleukin-6	Inflammation	27	12	4.65047e-06	5.68971e-05	CBL; HAMP; ICAM1; JAK1; JAK2; NFKB1; PPARGC1A; PTPN11; SMAD4; SRC; STAT1; STAT3	O60674; P05362; P12931; P19838; P22681; P23458; P40763; P42224; P81172; Q06124; Q13485; Q9UBK2
GO_BIOLOGICAL_PROCESS	cellular response to interleukin-15	Inflammation	13	8	9.0228e-06	0.000105545	GRB2; JAK1; JAK3; PLCB1; SHC1; STAT3; STAT5A; STAT5B	P23458; P29353; P40763; P42229; P51692; P52333; P62993; Q9NQ66
GO_BIOLOGICAL_PROCESS	response to corticosteroid	Inflammation	129	30	1.00056e-05	0.000116285	ASS1; BAD; BCL2; BCL2L11; CASP3; CASP9; CDKN1A; CRH; CYBA; CYBB; DDIT4; EDN1; EGFR; EIF4E; EPO; FOS; FOSB; FOSL1; FOXO1; FOXO3; HSD3B2; ICAM1; IL10; IL1RN; KRAS; NEFL; PTGS2; RHOA; SRC; TNF	O43521; O43524; P00533; P00966; P01100; P01116; P01375; P01588; P04839; P05305; P05362; P06730; P06850; P07196; P10415; P12931; P13498; P15407; P18510; P22301; P26439; P35354; P38936; P42574; P53539; P55211; P61586; Q12778; Q92934; Q9NX09
GO_BIOLOGICAL_PROCESS	response to interleukin-15	Inflammation	14	8	1.91797e-05	0.000210655	GRB2; JAK1; JAK3; PLCB1; SHC1; STAT3; STAT5A; STAT5B	P23458; P29353; P40763; P42229; P51692; P52333; P62993; Q9NQ66
GO_BIOLOGICAL_PROCESS	response to glucocorticoid	Inflammation	117	27	3.22457e-05	0.000329044	ASS1; BAD; BCL2; BCL2L11; CASP3; CASP9; CDKN1A; CRH; DDIT4; EDN1; EGFR; EIF4E; EPO; FOS; FOSB; FOSL1; FOXO1; FOXO3; HSD3B2; ICAM1; IL10; IL1RN; KRAS; NEFL; PTGS2; RHOA; TNF	O43521; O43524; P00533; P00966; P01100; P01116; P01375; P01588; P05305; P05362; P06730; P06850; P07196; P10415; P15407; P18510; P22301; P26439; P35354; P38936; P42574; P53539; P55211; P61586; Q12778; Q92934; Q9NX09
GO_BIOLOGICAL_PROCESS	cellular response to interleukin-2	Inflammation	12	7	5.54614e-05	0.000529866	JAK1; JAK3; PTK2B; SHC1; STAT5A; STAT5B; SYK	P23458; P29353; P42229; P43405; P51692; P52333; Q14289
GO_BIOLOGICAL_PROCESS	positive regulation of fibroblast migration	Inflammation	13	7	0.00010964	0.000941227	AKT1; PAK1; PAK3; PRKCE; PTK2; SLC8A1; TGFB1	O75914; P01137; P31749; P32418; Q02156; Q05397; Q13153
GO_BIOLOGICAL_PROCESS	response to interleukin-2	Inflammation	13	7	0.00010964	0.000941227	JAK1; JAK3; PTK2B; SHC1; STAT5A; STAT5B; SYK	P23458; P29353; P42229; P43405; P51692; P52333; Q14289
GO_BIOLOGICAL_PROCESS	interleukin-15-mediated signaling pathway	Inflammation	13	8	9.0228e-06	0.000105545	GRB2; JAK1; JAK3; PLCB1; SHC1; STAT3; STAT5A; STAT5B	P23458; P29353; P40763; P42229; P51692; P52333; P62993; Q9NQ66
GO_BIOLOGICAL_PROCESS	interleukin-2-mediated signaling pathway	Inflammation	11	7	2.53313e-05	0.000270777	JAK1; JAK3; PTK2B; SHC1; STAT5A; STAT5B; SYK	P23458; P29353; P42229; P43405; P51692; P52333; Q14289
GO_BIOLOGICAL_PROCESS	interleukin-6-mediated signaling pathway	Inflammation	16	8	6.82439e-05	0.000629419	CBL; JAK1; JAK2; PTPN11; SMAD4; SRC; STAT1; STAT3	O60674; P12931; P22681; P23458; P40763; P42224; Q06124; Q13485
GO_BIOLOGICAL_PROCESS	positive regulation of chemotaxis	Inflammation	107	31	3.71924e-08	6.89594e-07	BMPR2; CCL3; CCL5; CCR2; CCR7; CREB3; CSF1; CXCL10; CXCL8; CXCR4; EDN1; HSPB1; IL23A; KDR; MAPK1; MAPK14; MAPK3; NCKAP1L; NRP1; PRKD1; PRKD2; PTK2; PTK2B; RAC1; RAC2; SERPINE1; SMAD3; TGFB1; TIAM1; VEGFA; VEGFD	O14786; O43889; O43915; P01137; P02778; P04792; P05121; P05305; P09603; P10145; P10147; P13501; P15153; P15692; P27361; P28482; P32248; P35968; P41597; P55160; P61073; P63000; P84022; Q05397; Q13009; Q13873; Q14289; Q15139; Q16539; Q9BZL6; Q9NPF7
GO_BIOLOGICAL_PROCESS	T cell costimulation	Inflammation	49	17	3.15593e-06	4.07607e-05	AKT1; CD40LG; CDC42; FYN; GRB2; LGALS1; MAP3K8; PAK1; PAK2; PAK3; PDPK1; PIK3CA; PIK3R1; PTPN11; RAC1; SRC; VAV1	O15530; O75914; P06241; P09382; P12931; P15498; P27986; P29965; P31749; P41279; P42336; P60953; P62993; P63000; Q06124; Q13153; Q13177
GO_BIOLOGICAL_PROCESS	response to interleukin-6	Inflammation	31	13	4.09855e-06	5.13675e-05	CBL; FOXA2; HAMP; ICAM1; JAK1; JAK2; NFKB1; PPARGC1A; PTPN11; SMAD4; SRC; STAT1; STAT3	O60674; P05362; P12931; P19838; P22681; P23458; P40763; P42224; P81172; Q06124; Q13485; Q9UBK2; Q9Y261
GO_BIOLOGICAL_PROCESS	cellular response to tumor necrosis factor	Inflammation	175	37	1.00384e-05	0.00011629	AKT1; ASS1; BIRC2; BIRC3; CCL11; CCL17; CCL2; CCL3; CCL5; CD40; CD40LG; CHUK; CXCL8; CYBA; EDN1; FOXO3; HAMP; ICAM1; IKBKB; ILK; JAK2; MAP3K14; MAPK1; MAPK14; MAPK3; NFKB1; NFKBIA; PPARGC1A; PTK2B; SLC2A4; STAT1; TNF; TNFRSF1B; TNFSF11; TRAF2; TRPV1; VCAM1	O14788; O14920; O15111; O43524; O60674; P00966; P01375; P05305; P05362; P10145; P10147; P13498; P13500; P13501; P14672; P19320; P19838; P20333; P25942; P25963; P27361; P28482; P29965; P31749; P42224; P51671; P81172; Q12933; Q13418; Q13489; Q13490; Q14289; Q16539; Q8NER1; Q92583; Q99558; Q9UBK2
GO_BIOLOGICAL_PROCESS	response to interleukin-1	Inflammation	158	34	1.5574e-05	0.000173705	CCL11; CCL17; CCL2; CCL3; CCL5; CD38; CD40; CEBPB; CHUK; CXCL8; CYBA; EDN1; EGR1; EPO; ETS1; HIF1A; ICAM1; IKBKB; IKBKG; IL1RN; MAP3K3; MAP3K7; MAP3K8; MAPK11; MAPK13; MAPK3; MYLK3; NFKB1; NFKBIA; PLCB1; PRKCA; PRKCI; RPS6KA5; SRC	O14920; O15111; O15264; O43318; O75582; P01588; P05305; P05362; P10145; P10147; P12931; P13498; P13500; P13501; P14921; P17252; P17676; P18146; P18510; P19838; P25942; P25963; P27361; P28907; P41279; P41743; P51671; Q15759; Q16665; Q32MK0; Q92583; Q99759; Q9NQ66; Q9Y6K9
GO_BIOLOGICAL_PROCESS	regulation of cytokine production involved in General immune-related processes response	Inflammation	67	18	8.5057e-05	0.000762968	BCL6; BTK; CCR2; FOXP3; HMOX1; IL10; JAK3; MAP3K7; MAPK14; MAPK3; NLRP3; PRKCZ; SMAD7; TBX21; TGFB1; TNF; TNFRSF1B; TRAF2	O15105; O43318; P01137; P01375; P09601; P20333; P22301; P27361; P41182; P41597; P52333; Q05513; Q06187; Q12933; Q16539; Q96P20; Q9BZS1; Q9UL17
GO_BIOLOGICAL_PROCESS	platelet activation	Inflammation	106	37	3.77631e-12	1.26357e-10	ACTB; ACTG1; CD40; CD40LG; F2R; FYN; GNA13; GNB1; GNG2; HSPB1; ILK; ITGA2B; ITGB3; LCP2; MAPK1; MAPK3; PDPK1; PIK3CA; PIK3CB; PIK3CG; PIK3R1; PIK3R5; PIK3R6; PLCG2; PRKCA; PRKCB; PRKCD; PRKCE; PRKCG; PTPN11; RAF1; SRC; SYK; TLN1; VAV1; VAV2; VAV3	O15530; P04049; P04792; P05106; P05129; P05771; P06241; P08514; P12931; P15498; P16885; P17252; P25116; P25942; P27361; P27986; P28482; P29965; P42336; P42338; P43405; P48736; P52735; P59768; P60709; P62873; P63261; Q02156; Q05655; Q06124; Q13094; Q13418; Q14344; Q5UE93; Q8WYR1; Q9UKW4; Q9Y490
GO_BIOLOGICAL_PROCESS	positive regulation of B cell differentiation	Leukostasis	13	7	0.00010964	0.000941227	BAD; BTK; IL10; MMP14; NCKAP1L; STAT5B; SYK	P22301; P43405; P50281; P51692; P55160; Q06187; Q92934
GO_BIOLOGICAL_PROCESS	positive regulation of leukocyte cell-cell adhesion	Leukostasis	184	46	3.56477e-09	7.65521e-08	AKT1; BAD; BCL6; CCL2; CCL5; CCR2; CCR7; CD40LG; CDC42; EPO; ETS1; FOXP3; FYN; GRB2; ICAM1; IL12B; IL21; IL23A; ITGB2; JAK3; LEP; LGALS1; MAP3K8; NCK2; NCKAP1L; NLRP3; PAK1; PAK2; PAK3; PDPK1; PIK3CA; PIK3R1; PIK3R6; PRKCZ; PTPN11; RAC1; RHOA; SELP; SRC; STAT5B; SYK; TNF; TNFSF11; VAV1; VCAM1; ZAP70	O14788; O15530; O43639; O75914; P01375; P01588; P05107; P05362; P06241; P09382; P12931; P13500; P13501; P14921; P15498; P16109; P19320; P27986; P29460; P29965; P31749; P32248; P41159; P41182; P41279; P41597; P42336; P43403; P43405; P51692; P52333; P55160; P60953; P61586; P62993; P63000; Q05513; Q06124; Q13153; Q13177; Q5UE93; Q92934; Q96P20; Q9BZS1; Q9HBE4; Q9NPF7
GO_BIOLOGICAL_PROCESS	regulation of leukocyte mediated immunity	Leukostasis	136	36	3.96572e-08	7.26093e-07	BCL6; BTK; CCR2; CD40; CRK; FOXP3; GAB2; HMOX1; ICAM1; IL10; IL12B; IL21; IL23A; ITGB2; JAK3; LEP; MAP3K7; NLRP3; NOS2; NPPA; PIK3R6; PRKCZ; RAC2; RASGRP1; SMAD7; SPHK2; STAT5B; STAT6; SYK; TBX21; TGFB1; TNF; TNFRSF1B; TRAF2; VAV1; WAS	O15105; O43318; O95267; P01137; P01160; P01375; P05107; P05362; P09601; P15153; P15498; P20333; P22301; P25942; P29460; P35228; P41159; P41182; P41597; P42226; P42768; P43405; P46108; P51692; P52333; Q05513; Q06187; Q12933; Q5UE93; Q96P20; Q9BZS1; Q9HBE4; Q9NPF7; Q9NRA0; Q9UL17; Q9UQC2
GO_BIOLOGICAL_PROCESS	neutrophil chemotaxis	Leukostasis	61	21	2.52601e-07	4.07446e-06	CCL11; CCL17; CCL2; CCL3; CCL5; CXCL1; CXCL10; CXCL2; CXCL3; CXCL8; EDN1; ITGB2; NCKAP1L; PIK3CD; PIK3CG; PIP5K1C; PLA2G1B; PREX1; SYK; VAV1; VAV3	O00329; O60331; P02778; P04054; P05107; P05305; P09341; P10145; P10147; P13500; P13501; P15498; P19875; P19876; P43405; P48736; P51671; P55160; Q8TCU6; Q92583; Q9UKW4
GO_BIOLOGICAL_PROCESS	myeloid leukocyte migration	Leukostasis	93	27	2.73971e-07	4.37989e-06	CCL11; CCL17; CCL2; CCL3; CCL5; CCR2; CCR7; CXCL1; CXCL10; CXCL2; CXCL3; CXCL8; EDN1; FLT1; ITGB2; NCKAP1L; PIK3CD; PIK3CG; PIP5K1C; PLA2G1B; PREX1; RAC1; STAT5B; SYK; TNFSF11; VAV1; VAV3	O00329; O14788; O60331; P02778; P04054; P05107; P05305; P09341; P10145; P10147; P13500; P13501; P15498; P17948; P19875; P19876; P32248; P41597; P43405; P48736; P51671; P51692; P55160; P63000; Q8TCU6; Q92583; Q9UKW4
GO_BIOLOGICAL_PROCESS	leukocyte chemotaxis	Leukostasis	101	28	4.74185e-07	7.34281e-06	CCL11; CCL17; CCL2; CCL3; CCL5; CCR2; CCR7; CXCL1; CXCL10; CXCL2; CXCL3; CXCL8; CXCR4; EDN1; FLT1; IL10; ITGB2; NCKAP1L; PIK3CD; PIK3CG; PIP5K1C; PLA2G1B; PREX1; RAC1; SYK; TNFSF11; VAV1; VAV3	O00329; O14788; O60331; P02778; P04054; P05107; P05305; P09341; P10145; P10147; P13500; P13501; P15498; P17948; P19875; P19876; P22301; P32248; P41597; P43405; P48736; P51671; P55160; P61073; P63000; Q8TCU6; Q92583; Q9UKW4
GO_BIOLOGICAL_PROCESS	regulation of leukocyte migration	Leukostasis	139	34	7.36646e-07	1.10175e-05	AKT1; CCL2; CCL3; CCL5; CCR2; CCR7; CREB3; CRK; CRKL; CSF1; CXCL10; CXCL8; EDN1; HMOX1; ICAM1; IL23A; ITGA2B; MAPK1; MAPK14; MAPK3; MMP14; NCKAP1L; PLCB1; PTK2; PTK2B; RAC1; RAC2; RHOA; SELP; SERPINE1; TNF; VEGFA; VEGFD; WASL	O00401; O43889; O43915; P01375; P02778; P05121; P05305; P05362; P08514; P09601; P09603; P10145; P10147; P13500; P13501; P15153; P15692; P16109; P27361; P28482; P31749; P32248; P41597; P46108; P46109; P50281; P55160; P61586; P63000; Q05397; Q14289; Q16539; Q9NPF7; Q9NQ66
GO_BIOLOGICAL_PROCESS	granulocyte chemotaxis	Leukostasis	65	21	8.49993e-07	1.24034e-05	CCL11; CCL17; CCL2; CCL3; CCL5; CXCL1; CXCL10; CXCL2; CXCL3; CXCL8; EDN1; ITGB2; NCKAP1L; PIK3CD; PIK3CG; PIP5K1C; PLA2G1B; PREX1; SYK; VAV1; VAV3	O00329; O60331; P02778; P04054; P05107; P05305; P09341; P10145; P10147; P13500; P13501; P15498; P19875; P19876; P43405; P48736; P51671; P55160; Q8TCU6; Q92583; Q9UKW4
GO_BIOLOGICAL_PROCESS	neutrophil migration	Leukostasis	65	21	8.49993e-07	1.24034e-05	CCL11; CCL17; CCL2; CCL3; CCL5; CXCL1; CXCL10; CXCL2; CXCL3; CXCL8; EDN1; ITGB2; NCKAP1L; PIK3CD; PIK3CG; PIP5K1C; PLA2G1B; PREX1; SYK; VAV1; VAV3	O00329; O60331; P02778; P04054; P05107; P05305; P09341; P10145; P10147; P13500; P13501; P15498; P19875; P19876; P43405; P48736; P51671; P55160; Q8TCU6; Q92583; Q9UKW4
GO_BIOLOGICAL_PROCESS	regulation of leukocyte proliferation	Leukostasis	180	40	1.15165e-06	1.64384e-05	BCL2; BCL6; BTK; CASP3; CCL5; CCR2; CD38; CD40; CD40LG; CDKN1A; CEBPB; CRP; CSF1; EPO; FOXP3; IL10; IL12B; IL21; IL23A; IL5; IRF1; IRS2; ITCH; JAK3; LEP; MAPK1; MAPK3; NCK2; NCKAP1L; NFATC2; PTK2; RAC2; SOS1; STAT5B; SYK; TNFAIP3; TNFRSF1B; VAV3; VCAM1; ZAP70	O43639; P01588; P02741; P05113; P09603; P10415; P10914; P13501; P15153; P17676; P19320; P20333; P21580; P22301; P25942; P27361; P28482; P28907; P29460; P29965; P38936; P41159; P41182; P41597; P42574; P43403; P43405; P51692; P52333; P55160; Q05397; Q06187; Q07889; Q13469; Q96J02; Q9BZS1; Q9HBE4; Q9NPF7; Q9UKW4; Q9Y4H2
GO_BIOLOGICAL_PROCESS	positive regulation of leukocyte chemotaxis	Leukostasis	68	21	1.95603e-06	2.67523e-05	CCL3; CCL5; CCR2; CCR7; CREB3; CSF1; CXCL10; CXCL8; EDN1; IL23A; MAPK1; MAPK14; MAPK3; NCKAP1L; PTK2; PTK2B; RAC1; RAC2; SERPINE1; VEGFA; VEGFD	O43889; O43915; P02778; P05121; P05305; P09603; P10145; P10147; P13501; P15153; P15692; P27361; P28482; P32248; P41597; P55160; P63000; Q05397; Q14289; Q16539; Q9NPF7
GO_BIOLOGICAL_PROCESS	positive regulation of leukocyte migration	Leukostasis	96	26	1.98959e-06	2.71596e-05	CCL3; CCL5; CCR2; CCR7; CREB3; CSF1; CXCL10; CXCL8; EDN1; ICAM1; IL23A; ITGA2B; MAPK1; MAPK14; MAPK3; MMP14; NCKAP1L; PTK2; PTK2B; RAC1; RAC2; RHOA; SERPINE1; TNF; VEGFA; VEGFD	O43889; O43915; P01375; P02778; P05121; P05305; P05362; P08514; P09603; P10145; P10147; P13501; P15153; P15692; P27361; P28482; P32248; P41597; P50281; P55160; P61586; P63000; Q05397; Q14289; Q16539; Q9NPF7
GO_BIOLOGICAL_PROCESS	regulation of mononuclear cell migration	Leukostasis	70	21	3.30006e-06	4.24698e-05	AKT1; CCL2; CCL3; CCL5; CCR2; CCR7; CREB3; CRK; CRKL; CSF1; CXCL10; MAPK1; MAPK14; MAPK3; PLCB1; PTK2; PTK2B; RHOA; SERPINE1; TNF; WASL	O00401; O43889; P01375; P02778; P05121; P09603; P10147; P13500; P13501; P27361; P28482; P31749; P32248; P41597; P46108; P46109; P61586; Q05397; Q14289; Q16539; Q9NQ66
GO_BIOLOGICAL_PROCESS	granulocyte migration	Leukostasis	71	21	4.24755e-06	5.30502e-05	CCL11; CCL17; CCL2; CCL3; CCL5; CXCL1; CXCL10; CXCL2; CXCL3; CXCL8; EDN1; ITGB2; NCKAP1L; PIK3CD; PIK3CG; PIP5K1C; PLA2G1B; PREX1; SYK; VAV1; VAV3	O00329; O60331; P02778; P04054; P05107; P05305; P09341; P10145; P10147; P13500; P13501; P15498; P19875; P19876; P43405; P48736; P51671; P55160; Q8TCU6; Q92583; Q9UKW4
GO_BIOLOGICAL_PROCESS	lymphocyte costimulation	Leukostasis	50	17	4.33682e-06	5.36989e-05	AKT1; CD40LG; CDC42; FYN; GRB2; LGALS1; MAP3K8; PAK1; PAK2; PAK3; PDPK1; PIK3CA; PIK3R1; PTPN11; RAC1; SRC; VAV1	O15530; O75914; P06241; P09382; P12931; P15498; P27986; P29965; P31749; P41279; P42336; P60953; P62993; P63000; Q06124; Q13153; Q13177
GO_BIOLOGICAL_PROCESS	positive regulation of leukocyte proliferation	Leukostasis	119	29	5.2847e-06	6.44375e-05	BCL2; BCL6; CCL5; CCR2; CD38; CD40; CD40LG; CDKN1A; CSF1; EPO; FOXP3; IL12B; IL21; IL23A; IL5; IRS2; JAK3; LEP; MAPK1; MAPK3; NCK2; NCKAP1L; NFATC2; PTK2; STAT5B; SYK; VAV3; VCAM1; ZAP70	O43639; P01588; P05113; P09603; P10415; P13501; P19320; P25942; P27361; P28482; P28907; P29460; P29965; P38936; P41159; P41182; P41597; P43403; P43405; P51692; P52333; P55160; Q05397; Q13469; Q9BZS1; Q9HBE4; Q9NPF7; Q9UKW4; Q9Y4H2
GO_BIOLOGICAL_PROCESS	regulation of mononuclear cell proliferation	Leukostasis	168	36	9.65436e-06	0.000112566	BCL2; BCL6; BTK; CASP3; CCL5; CCR2; CD38; CD40; CD40LG; CDKN1A; CEBPB; CRP; CSF1; EPO; FOXP3; IL10; IL12B; IL21; IL23A; IL5; IRF1; IRS2; ITCH; JAK3; LEP; NCK2; NCKAP1L; NFATC2; RAC2; SOS1; STAT5B; SYK; TNFRSF1B; VAV3; VCAM1; ZAP70	O43639; P01588; P02741; P05113; P09603; P10415; P10914; P13501; P15153; P17676; P19320; P20333; P22301; P25942; P28907; P29460; P29965; P38936; P41159; P41182; P41597; P42574; P43403; P43405; P51692; P52333; P55160; Q06187; Q07889; Q13469; Q96J02; Q9BZS1; Q9HBE4; Q9NPF7; Q9UKW4; Q9Y4H2
GO_BIOLOGICAL_PROCESS	regulation of leukocyte chemotaxis	Leukostasis	81	22	1.16741e-05	0.000133519	CCL2; CCL3; CCL5; CCR2; CCR7; CREB3; CSF1; CXCL10; CXCL8; EDN1; IL23A; MAPK1; MAPK14; MAPK3; NCKAP1L; PTK2; PTK2B; RAC1; RAC2; SERPINE1; VEGFA; VEGFD	O43889; O43915; P02778; P05121; P05305; P09603; P10145; P10147; P13500; P13501; P15153; P15692; P27361; P28482; P32248; P41597; P55160; P63000; Q05397; Q14289; Q16539; Q9NPF7
GO_BIOLOGICAL_PROCESS	T cell migration	Leukostasis	22	10	2.33439e-05	0.000251778	CCL2; CCL3; CCR2; CRK; CRKL; CXCL10; ICAM1; PIK3CD; PIK3CG; ZAP70	O00329; P02778; P05362; P10147; P13500; P41597; P43403; P46108; P46109; P48736
GO_BIOLOGICAL_PROCESS	leukocyte homeostasis	Leukostasis	51	16	2.64106e-05	0.000279409	ABL1; AKT1; BAX; BCL2; BCL2L11; CASP3; CCR2; FOXP3; HIF1A; JAK3; NCKAP1L; PMAIP1; RPS6; SOS1; STAT5B; TNFAIP3	O43521; P00519; P10415; P21580; P31749; P41597; P42574; P51692; P52333; P55160; P62753; Q07812; Q07889; Q13794; Q16665; Q9BZS1
GO_BIOLOGICAL_PROCESS	lymphocyte migration	Leukostasis	48	15	4.96514e-05	0.000484657	CCL11; CCL17; CCL2; CCL3; CCL5; CCR2; CCR7; CRK; CRKL; CXCL10; ICAM1; PIK3CD; PIK3CG; TBX21; ZAP70	O00329; P02778; P05362; P10147; P13500; P13501; P32248; P41597; P43403; P46108; P46109; P48736; P51671; Q92583; Q9UL17
GO_BIOLOGICAL_PROCESS	positive regulation of leukocyte differentiation	Leukostasis	120	27	5.19194e-05	0.00050338	BAD; BCL6; BTK; CREB1; CSF1; FOS; FOXP3; IL10; IL12B; IL23A; IL5; JUN; LGALS1; MMP14; NCKAP1L; NLRP3; PIK3R6; PRKCA; PRKCZ; RB1; RHOA; STAT5B; SYK; TGFB1; TNF; TNFSF11; ZAP70	O14788; P01100; P01137; P01375; P05113; P05412; P06400; P09382; P09603; P16220; P17252; P22301; P29460; P41182; P43403; P43405; P50281; P51692; P55160; P61586; Q05513; Q06187; Q5UE93; Q92934; Q96P20; Q9BZS1; Q9NPF7
GO_BIOLOGICAL_PROCESS	mononuclear cell migration	Leukostasis	74	19	0.0001061	0.00092407	CCL11; CCL17; CCL2; CCL3; CCL5; CCR2; CCR7; CDC42; CRK; CRKL; CXCL10; CXCR4; FLT1; ICAM1; PIK3CD; PIK3CG; TBX21; TNFSF11; ZAP70	O00329; O14788; P02778; P05362; P10147; P13500; P13501; P17948; P32248; P41597; P43403; P46108; P46109; P48736; P51671; P60953; P61073; Q92583; Q9UL17
GO_BIOLOGICAL_PROCESS	positive regulation of myeloid cell differentiation	Leukostasis	70	22	7.95129e-07	1.17699e-05	CREB1; CSF1; ETS1; FOS; FOXO3; HIF1A; IL12B; IL23A; IL5; JUN; MAPK11; MAPK14; MED1; NCKAP1L; PRKCA; RB1; STAT1; STAT3; STAT5B; TGFB1; TNF; TNFSF11	O14788; O43524; P01100; P01137; P01375; P05113; P05412; P06400; P09603; P14921; P16220; P17252; P29460; P40763; P42224; P51692; P55160; Q15648; Q15759; Q16539; Q16665; Q9NPF7
GO_BIOLOGICAL_PROCESS	myeloid cell differentiation	Leukostasis	144	34	1.76578e-06	2.43353e-05	BCL6; CASP3; CASP9; CCR7; CDC42; CDKN2B; CSF1; CSF2; EP300; EPO; FARP2; FLI1; GAB2; IRF4; JAK2; JAK3; JUN; JUNB; MAPK14; MED1; MITF; MMP9; NCKAP1L; PIK3CD; PSEN1; PTPN11; RB1; RPS6; SRC; THRA; TNF; TNFSF11; VEGFA; WASF2	O00329; O14788; O60674; O75030; O94887; P01375; P01588; P04141; P05412; P06400; P09603; P10827; P12931; P14780; P15692; P17275; P32248; P41182; P42574; P42772; P49768; P52333; P55160; P55211; P60953; P62753; Q01543; Q06124; Q09472; Q15306; Q15648; Q16539; Q9UQC2; Q9Y6W5
GO_BIOLOGICAL_PROCESS	regulation of myeloid cell differentiation	Leukostasis	167	36	8.37415e-06	9.876e-05	CCL3; CDK6; CEBPB; CREB1; CREBBP; CSF1; CSF2; EP300; ETS1; FOS; FOXO3; HIF1A; IL12B; IL23A; IL5; IRF7; ITGA2B; JUN; MAPK11; MAPK14; MED1; MITF; MTOR; MYC; NCKAP1L; PIK3R1; PRKCA; PRKCB; PTK2B; RB1; STAT1; STAT3; STAT5B; TGFB1; TNF; TNFSF11	O14788; O43524; O75030; P01100; P01106; P01137; P01375; P04141; P05113; P05412; P05771; P06400; P08514; P09603; P10147; P14921; P16220; P17252; P17676; P27986; P29460; P40763; P42224; P42345; P51692; P55160; Q00534; Q09472; Q14289; Q15648; Q15759; Q16539; Q16665; Q92793; Q92985; Q9NPF7
GO_BIOLOGICAL_PROCESS	regulation of chemotaxis	Leukostasis	144	32	1.3893e-05	0.000157396	BMPR2; CCL2; CCL3; CCL5; CCR2; CCR7; CREB3; CSF1; CXCL10; CXCL8; CXCR4; EDN1; HSPB1; IL23A; KDR; MAPK1; MAPK14; MAPK3; NCKAP1L; NRP1; PRKD1; PRKD2; PTK2; PTK2B; RAC1; RAC2; SERPINE1; SMAD3; TGFB1; TIAM1; VEGFA; VEGFD	O14786; O43889; O43915; P01137; P02778; P04792; P05121; P05305; P09603; P10145; P10147; P13500; P13501; P15153; P15692; P27361; P28482; P32248; P35968; P41597; P55160; P61073; P63000; P84022; Q05397; Q13009; Q13873; Q14289; Q15139; Q16539; Q9BZL6; Q9NPF7
GO_BIOLOGICAL_PROCESS	regulation of granulocyte chemotaxis	Leukostasis	36	13	2.83537e-05	0.000296477	CCL5; CCR7; CSF1; CXCL8; EDN1; IL23A; MAPK1; MAPK14; MAPK3; NCKAP1L; PTK2; RAC1; RAC2	P05305; P09603; P10145; P13501; P15153; P27361; P28482; P32248; P55160; P63000; Q05397; Q16539; Q9NPF7
GO_BIOLOGICAL_PROCESS	alpha-beta T cell activation	Leukostasis	42	14	3.95266e-05	0.000396589	ABL1; BCL2; DOCK2; FOXP3; IL12B; IL21; IRF1; IRF4; ITK; RHOA; STAT3; STAT6; SYK; ZAP70	P00519; P10415; P10914; P29460; P40763; P42226; P43403; P43405; P61586; Q08881; Q15306; Q92608; Q9BZS1; Q9HBE4
GO_BIOLOGICAL_PROCESS	positive regulation of hemopoiesis	Leukostasis	120	27	5.19194e-05	0.00050338	BAD; BCL6; BTK; CREB1; CSF1; FOS; FOXP3; IL10; IL12B; IL23A; IL5; JUN; LGALS1; MMP14; NCKAP1L; NLRP3; PIK3R6; PRKCA; PRKCZ; RB1; RHOA; STAT5B; SYK; TGFB1; TNF; TNFSF11; ZAP70	O14788; P01100; P01137; P01375; P05113; P05412; P06400; P09382; P09603; P16220; P17252; P22301; P29460; P41182; P43403; P43405; P50281; P51692; P55160; P61586; Q05513; Q06187; Q5UE93; Q92934; Q96P20; Q9BZS1; Q9NPF7
GO_BIOLOGICAL_PROCESS	regulation of cell-substrate junction assembly	Adhesion, cytoskeleton and junction	43	14	5.32131e-05	0.000513846	ABL1; ACTG1; KDR; MMP14; NRP1; PTK2; RAC1; RHOA; ROCK2; SLC9A1; SMAD3; SRC; TSC1; VEGFA	O14786; O75116; P00519; P12931; P15692; P19634; P35968; P50281; P61586; P63000; P63261; P84022; Q05397; Q92574
GO_BIOLOGICAL_PROCESS	regulation of muscle adaptation	Unclassified	61	17	8.09165e-05	0.000728552	EDN1; FOXO1; FOXO3; GSK3A; HAMP; MTOR; PAK1; PPARA; PPARGC1A; PRKAG3; PRKCA; PTK2; ROCK2; SLC9A1; SMAD3; SMAD4; TNFRSF1B	O43524; O75116; P05305; P17252; P19634; P20333; P42345; P49840; P81172; P84022; Q05397; Q07869; Q12778; Q13153; Q13485; Q9UBK2; Q9UGI9
GO_BIOLOGICAL_PROCESS	positive regulation of lipase activity	Unclassified	61	17	8.09165e-05	0.000728552	ABL2; APOA5; BDNF; CCL5; EGFR; ESR1; FLT1; GNA13; HRAS; ITK; PDPK1; PLA2G1B; PLCB2; PLCG1; PRKCZ; RHOA; TXK	O15530; P00533; P01112; P03372; P04054; P13501; P17948; P19174; P23560; P42681; P42684; P61586; Q00722; Q05513; Q08881; Q14344; Q6Q788
GO_BIOLOGICAL_PROCESS	phospholipid biosynthetic process	Unclassified	75	24	1.70477e-07	2.85212e-06	CHKA; CHKB; PIK3CA; PIK3CB; PIK3CD; PIK3CG; PIK3R1; PIK3R2; PIK3R3; PIK3R5; PIK3R6; PIP5K1A; PIP5K1B; PIP5K1C; PLA2G1B; PLA2G2A; PLA2G4A; PLA2G6; PLAAT3; PLCG2; PLD1; PLD2; PTPN13; SPHK2	O00329; O00459; O14939; O14986; O60331; O60733; P04054; P14555; P16885; P27986; P35790; P42336; P42338; P47712; P48736; P53816; Q12923; Q13393; Q5UE93; Q8WYR1; Q92569; Q99755; Q9NRA0; Q9Y259
GO_BIOLOGICAL_PROCESS	glycerolipid biosynthetic process	Unclassified	70	23	1.79481e-07	2.99579e-06	CHKA; CHKB; PIK3CA; PIK3CB; PIK3CD; PIK3CG; PIK3R1; PIK3R2; PIK3R3; PIK3R5; PIK3R6; PIP5K1A; PIP5K1B; PIP5K1C; PLA2G1B; PLA2G2A; PLA2G4A; PLA2G6; PLCE1; PLCG2; PLD1; PLD2; PTPN13	O00329; O00459; O14939; O14986; O60331; O60733; P04054; P14555; P16885; P27986; P35790; P42336; P42338; P47712; P48736; Q12923; Q13393; Q5UE93; Q8WYR1; Q92569; Q99755; Q9P212; Q9Y259
GO_BIOLOGICAL_PROCESS	glycerophospholipid metabolic process	Unclassified	98	28	2.38028e-07	3.85669e-06	APOA5; CHKA; CHKB; PIK3CA; PIK3CB; PIK3CD; PIK3CG; PIK3R1; PIK3R2; PIK3R3; PIK3R5; PIK3R6; PIP5K1A; PIP5K1B; PIP5K1C; PLA2G1B; PLA2G2A; PLA2G4A; PLA2G6; PLAAT3; PLCB1; PLCB2; PLCB3; PLCG1; PLCG2; PLD1; PLD2; PTPN13	O00329; O00459; O14939; O14986; O60331; O60733; P04054; P14555; P16885; P19174; P27986; P35790; P42336; P42338; P47712; P48736; P53816; Q00722; Q01970; Q12923; Q13393; Q5UE93; Q6Q788; Q8WYR1; Q92569; Q99755; Q9NQ66; Q9Y259
GO_BIOLOGICAL_PROCESS	glycerolipid metabolic process	Unclassified	135	32	3.26862e-06	4.21405e-05	APOA5; APOC3; CHKA; CHKB; G6PC; PIK3CA; PIK3CB; PIK3CD; PIK3CG; PIK3R1; PIK3R2; PIK3R3; PIK3R5; PIK3R6; PIP5K1A; PIP5K1B; PIP5K1C; PLA2G1B; PLA2G2A; PLA2G4A; PLA2G6; PLAAT3; PLCB1; PLCB2; PLCB3; PLCE1; PLCG1; PLCG2; PLD1; PLD2; PTPN11; PTPN13	O00329; O00459; O14939; O14986; O60331; O60733; P02656; P04054; P14555; P16885; P19174; P27986; P35575; P35790; P42336; P42338; P47712; P48736; P53816; Q00722; Q01970; Q06124; Q12923; Q13393; Q5UE93; Q6Q788; Q8WYR1; Q92569; Q99755; Q9NQ66; Q9P212; Q9Y259
GO_BIOLOGICAL_PROCESS	lipid phosphorylation	Unclassified	34	13	1.38062e-05	0.000156659	PIK3CA; PIK3CB; PIK3CD; PIK3CG; PIK3R1; PIK3R2; PIK3R3; PIK3R6; PIP5K1A; PIP5K1B; PIP5K1C; SPHK1; SPHK2	O00329; O00459; O14986; O60331; P27986; P42336; P42338; P48736; Q5UE93; Q92569; Q99755; Q9NRA0; Q9NYA1
GO_BIOLOGICAL_PROCESS	sphingolipid mediated signaling pathway	Unclassified	10	7	1.00986e-05	0.0001168	AKT1; EZR; PIK3CB; PIK3CG; RAC1; SPHK1; SPHK2	P15311; P31749; P42338; P48736; P63000; Q9NRA0; Q9NYA1
GO_BIOLOGICAL_PROCESS	regulation of lipid catabolic process	Unclassified	36	15	8.10937e-07	1.19547e-05	AKT1; AKT2; APOA5; APOC3; CDK4; IRS2; MTOR; PIK3CG; PPARA; PRKAA1; PRKCD; PRKCE; THRA; TNF; TWIST1	P01375; P02656; P10827; P11802; P31749; P31751; P42345; P48736; Q02156; Q05655; Q07869; Q13131; Q15672; Q6Q788; Q9Y4H2
GO_BIOLOGICAL_PROCESS	glycerophospholipid biosynthetic process	Unclassified	61	22	4.97566e-08	8.97116e-07	CHKA; CHKB; PIK3CA; PIK3CB; PIK3CD; PIK3CG; PIK3R1; PIK3R2; PIK3R3; PIK3R5; PIK3R6; PIP5K1A; PIP5K1B; PIP5K1C; PLA2G1B; PLA2G2A; PLA2G4A; PLA2G6; PLCG2; PLD1; PLD2; PTPN13	O00329; O00459; O14939; O14986; O60331; O60733; P04054; P14555; P16885; P27986; P35790; P42336; P42338; P47712; P48736; Q12923; Q13393; Q5UE93; Q8WYR1; Q92569; Q99755; Q9Y259
GO_BIOLOGICAL_PROCESS	phospholipid metabolic process	Unclassified	121	29	7.52266e-06	8.95082e-05	APOA5; CHKA; CHKB; PIK3CA; PIK3CB; PIK3CD; PIK3CG; PIK3R1; PIK3R2; PIK3R3; PIK3R5; PIK3R6; PIP5K1A; PIP5K1B; PIP5K1C; PLA2G1B; PLA2G2A; PLA2G4A; PLA2G6; PLAAT3; PLCB1; PLCB2; PLCB3; PLCG1; PLCG2; PLD1; PLD2; PTPN13; SPHK2	O00329; O00459; O14939; O14986; O60331; O60733; P04054; P14555; P16885; P19174; P27986; P35790; P42336; P42338; P47712; P48736; P53816; Q00722; Q01970; Q12923; Q13393; Q5UE93; Q6Q788; Q8WYR1; Q92569; Q99755; Q9NQ66; Q9NRA0; Q9Y259
GO_BIOLOGICAL_PROCESS	regulation of lipid localization	Unclassified	113	27	1.64883e-05	0.000182768	AKT1; AKT2; APOA5; APOC3; ATP1A2; CCK; CRH; CRP; EDN1; IRS2; ITGAV; ITGB3; LEP; MAP2K6; MSR1; NFKB1; NFKBIA; PLA2G4A; PLA2G6; PPARA; PRKCD; PSEN1; PTGES; PTPN11; SYK; TNF; TNFSF11	O14684; O14788; O60733; P01375; P02656; P02741; P05106; P05305; P06307; P06756; P06850; P19838; P21757; P25963; P31749; P31751; P41159; P43405; P47712; P49768; P50993; P52564; Q05655; Q06124; Q07869; Q6Q788; Q9Y4H2
GO_BIOLOGICAL_PROCESS	positive regulation of lipid metabolic process	Unclassified	109	26	2.44027e-05	0.000262411	AKT1; AKT2; APOA5; CCR7; CDC42; CREB1; FLT1; IRS2; MTOR; PLA2G6; PPARA; PPARGC1A; PRKAA1; PRKCD; PRKCE; PRKD1; PTGS2; PTK2; PTK2B; SPHK2; SRC; TGFB1; TNF; TWIST1; VAV2; VAV3	O60733; P01137; P01375; P12931; P16220; P17948; P31749; P31751; P32248; P35354; P42345; P52735; P60953; Q02156; Q05397; Q05655; Q07869; Q13131; Q14289; Q15139; Q15672; Q6Q788; Q9NRA0; Q9UBK2; Q9UKW4; Q9Y4H2
GO_BIOLOGICAL_PROCESS	negative regulation of lipid localization	Unclassified	38	13	5.48089e-05	0.000526429	AKT1; AKT2; APOC3; CRP; IRS2; ITGAV; ITGB3; LEP; NFKB1; NFKBIA; PPARA; PTPN11; TNF	P01375; P02656; P02741; P05106; P06756; P19838; P25963; P31749; P31751; P41159; Q06124; Q07869; Q9Y4H2
GO_BIOLOGICAL_PROCESS	neurotrophin TRK receptor signaling pathway	Retynopathy and glia-related	19	9	4.04845e-05	0.000403947	BCAR1; BDNF; CASP3; DDIT4; GRB2; PTPN11; RAF1; SOS1; SRC	P04049; P12931; P23560; P42574; P56945; P62993; Q06124; Q07889; Q9NX09
GO_BIOLOGICAL_PROCESS	ephrin receptor signaling pathway	Retynopathy and glia-related	80	30	5.60271e-11	1.56224e-09	ACTB; ACTG1; ARPC1B; ARPC3; CDC42; CRK; DNM1; EPHB2; EPHB4; EPHB6; FYN; HRAS; MMP2; MMP9; NCK2; NGEF; PAK1; PAK3; PSEN1; PTK2; PTPN11; RAC1; RASA1; RHOA; ROCK2; SRC; TIAM1; VAV2; VAV3; WASL	O00401; O15143; O15145; O15197; O43639; O75116; O75914; P01112; P06241; P08253; P12931; P14780; P20936; P29323; P46108; P49768; P52735; P54760; P60709; P60953; P61586; P63000; P63261; Q05193; Q05397; Q06124; Q13009; Q13153; Q8N5V2; Q9UKW4
GO_BIOLOGICAL_PROCESS	neurotrophin signaling pathway	Retynopathy and glia-related	26	11	2.08253e-05	0.000226996	BCAR1; BDNF; CASP3; DDIT4; GRB2; PTPN11; RAF1; RAP1A; RAPGEF1; SOS1; SRC	P04049; P12931; P23560; P42574; P56945; P62834; P62993; Q06124; Q07889; Q13905; Q9NX09
GO_BIOLOGICAL_PROCESS	response to osmotic stress	Osmotic stress and ionic channels	46	15	2.82119e-05	0.000296287	ATF2; BAX; CASP3; EGFR; EPO; MAP2K7; MAPK10; MAPK13; MYLK; PTGS2; PTK2B; SLC2A1; SLC2A4; TNF; TRPV4	O14733; O15264; P00533; P01375; P01588; P11166; P14672; P15336; P35354; P42574; P53779; Q07812; Q14289; Q15746; Q9HBA0
GO_BIOLOGICAL_PROCESS	regulation of anion transmembrane transport	Osmotic stress and ionic channels	79	25	1.20229e-07	2.07915e-06	ABCB1; AKT1; AKT2; ATP1A2; BRAF; CFTR; EDN1; GSK3A; INSR; IRS2; LEP; MAPK14; MTOR; PIK3R1; PLA2G1B; PRKAG2; PRKCB; PRKCI; PSEN1; PTPN11; RAP1A; RHOQ; SLC2A1; TERT; TNF	O14746; P01375; P04054; P05305; P05771; P06213; P08183; P11166; P13569; P15056; P17081; P27986; P31749; P31751; P41159; P41743; P42345; P49768; P49840; P50993; P62834; Q06124; Q16539; Q9UGJ0; Q9Y4H2
GO_BIOLOGICAL_PROCESS	positive regulation of superoxide anion generation	Oxidative Stress	18	9	2.34077e-05	0.000252088	CRP; CYBA; EGFR; GNAI2; GNAI3; ITGB2; PRKCD; SYK; TGFB1	P00533; P01137; P02741; P04899; P05107; P08754; P13498; P43405; Q05655
GO_BIOLOGICAL_PROCESS	energy derivation by oxidation of organic compounds	Oxidative Stress	74	20	3.15043e-05	0.000321935	AKT1; AKT2; BID; G6PC; GSK3A; GSK3B; LEP; MTOR; MYC; PPARGC1A; PPP1CA; PPP1CB; PPP1CC; PPP1R3A; PPP1R3B; PPP1R3C; PPP1R3D; PPP1R3E; PRKAG2; PRKAG3	O95685; P01106; P31749; P31751; P35575; P36873; P41159; P42345; P49840; P49841; P55957; P62136; P62140; Q16821; Q86XI6; Q9H7J1; Q9UBK2; Q9UGI9; Q9UGJ0; Q9UQK1
GO_BIOLOGICAL_PROCESS	superoxide anion generation	Oxidative Stress	12	7	5.54614e-05	0.000529866	CYBA; CYBB; EDN1; NCF1; NCF2; NOX1; NOX4	P04839; P05305; P13498; P14598; P19878; Q9NPH5; Q9Y5S8
GO_BIOLOGICAL_PROCESS	superoxide metabolic process	Oxidative Stress	24	10	5.85835e-05	0.000556726	CYBA; CYBB; EDN1; NCF1; NCF2; NCF4; NOS2; NOX1; NOX4; PREX1	P04839; P05305; P13498; P14598; P19878; P35228; Q15080; Q8TCU6; Q9NPH5; Q9Y5S8
GO_BIOLOGICAL_PROCESS	regulation of fatty acid oxidation	Oxidative Stress	16	8	6.82439e-05	0.000629419	AKT1; AKT2; IRS2; MTOR; PPARA; PPARGC1A; PRKAG2; TWIST1	P31749; P31751; P42345; Q07869; Q15672; Q9UBK2; Q9UGJ0; Q9Y4H2
GO_BIOLOGICAL_PROCESS	regulation of reactive oxygen species metabolic process	Oxidative Stress	139	42	2.89339e-11	8.56585e-10	AKT1; ASS1; BCL2; BIRC2; CDKN1A; CRP; CYBA; DNM2; EDN1; EGFR; FOXM1; FOXO1; FOXO3; FYN; GNAI2; GNAI3; GRB2; HIF1A; ICAM1; IL10; INSR; ITGB2; JAK2; LEP; MAPK14; MTOR; NOX4; PPARA; PRKCD; PTGS2; PTK2B; RAC1; RAC2; RHOA; ROCK2; SMAD3; SPHK2; STAT3; SYK; TGFB1; TNF; TRPV1	O43524; O60674; O75116; P00533; P00966; P01137; P01375; P02741; P04899; P05107; P05305; P05362; P06213; P06241; P08754; P10415; P13498; P15153; P22301; P31749; P35354; P38936; P40763; P41159; P42345; P43405; P50570; P61586; P62993; P63000; P84022; Q05655; Q07869; Q08050; Q12778; Q13490; Q14289; Q16539; Q16665; Q8NER1; Q9NPH5; Q9NRA0
GO_BIOLOGICAL_PROCESS	stress-activated protein kinase signaling cascade	Oxidative Stress	93	33	3.44925e-11	1.01281e-09	ARHGEF6; CD40LG; CHUK; CRKL; IKBKB; IKBKG; MAP2K3; MAP2K4; MAP2K7; MAP3K11; MAP3K7; MAP3K8; MAPK1; MAPK10; MAPK11; MAPK13; MAPK14; MAPK3; MAPK8; MAPK9; MAPKAPK2; NFKB1; PAK1; PAK2; PAK3; PAK4; PAK5; PAK6; RHOA; STK3; SYK; TNF; TNFSF11	O14733; O14788; O14920; O15111; O15264; O43318; O75914; O96013; P01375; P19838; P27361; P28482; P29965; P41279; P43405; P45983; P45984; P45985; P46109; P46734; P49137; P53779; P61586; Q13153; Q13177; Q13188; Q15052; Q15759; Q16539; Q16584; Q9NQU5; Q9P286; Q9Y6K9
GO_BIOLOGICAL_PROCESS	positive regulation of reactive oxygen species metabolic process	Oxidative Stress	77	28	5.7515e-10	1.43668e-08	AKT1; ASS1; CDKN1A; CRP; CYBA; DNM2; EDN1; EGFR; FOXO3; GNAI2; GNAI3; GRB2; ICAM1; INSR; ITGB2; JAK2; LEP; MAPK14; MTOR; NOX4; PRKCD; PTGS2; PTK2B; SMAD3; SYK; TGFB1; TNF; TRPV1	O43524; O60674; P00533; P00966; P01137; P01375; P02741; P04899; P05107; P05305; P05362; P06213; P08754; P13498; P31749; P35354; P38936; P41159; P42345; P43405; P50570; P62993; P84022; Q05655; Q14289; Q16539; Q8NER1; Q9NPH5
GO_BIOLOGICAL_PROCESS	response to reactive oxygen species	Oxidative Stress	153	42	8.29538e-10	2.01611e-08	ABL1; AKT1; BAD; BCL2; CASP3; CCR7; CHUK; CRK; DNM2; EDN1; EGFR; EGLN1; ETS1; FOS; FOSL1; FOXO1; FYN; GNAO1; HIF1A; HMOX1; JUN; LDHA; MAPK1; MAPK13; MAPK3; MAPK8; MAPK9; MMP2; MMP9; NCF1; PPARGC1A; PPP2CB; PRKAA1; PRKCD; PTK2B; PXN; SLC8A1; SPHK1; SRC; STAT6; TNFAIP3; TRAF2	O15111; O15264; P00338; P00519; P00533; P01100; P05305; P05412; P06241; P08253; P09471; P09601; P10415; P12931; P14598; P14780; P14921; P15407; P21580; P27361; P28482; P31749; P32248; P32418; P42226; P42574; P45983; P45984; P46108; P49023; P50570; P62714; Q05655; Q12778; Q12933; Q13131; Q14289; Q16665; Q92934; Q9GZT9; Q9NYA1; Q9UBK2
GO_BIOLOGICAL_PROCESS	cellular response to oxidative stress	Oxidative Stress	168	42	1.76813e-08	3.53331e-07	ABL1; AKT1; ARNTL; ATF4; BCL2; CHUK; CRK; CYBA; CYBB; DNM2; EGFR; ETS1; FOS; FOXO1; FOXO3; HIF1A; HMOX1; JAK2; JUN; MAPK1; MAPK13; MAPK3; MAPK8; MAPK9; MMP2; MMP9; NCF1; NCF2; NCF4; NOX4; PDK1; PPARGC1A; PRKAA1; PRKAA2; PRKCD; PRKD1; PXN; SPHK1; SRC; STAT6; TNFAIP3; TRAF2	O00327; O15111; O15264; O43524; O60674; P00519; P00533; P01100; P04839; P05412; P08253; P09601; P10415; P12931; P13498; P14598; P14780; P14921; P18848; P19878; P21580; P27361; P28482; P31749; P42226; P45983; P45984; P46108; P49023; P50570; P54646; Q05655; Q12778; Q12933; Q13131; Q15080; Q15118; Q15139; Q16665; Q9NPH5; Q9NYA1; Q9UBK2
GO_BIOLOGICAL_PROCESS	regulation of reactive oxygen species biosynthetic process	Oxidative Stress	69	24	2.75614e-08	5.21781e-07	AKT1; ASS1; CYBA; DNM2; EDN1; FOXO3; FYN; ICAM1; IL10; INSR; ITGB2; JAK2; MTOR; PPARA; PTGS2; PTK2B; RAC1; RHOA; ROCK2; SMAD3; SPHK2; STAT3; TNF; TRPV1	O43524; O60674; O75116; P00966; P01375; P05107; P05305; P05362; P06213; P06241; P13498; P22301; P31749; P35354; P40763; P42345; P50570; P61586; P63000; P84022; Q07869; Q14289; Q8NER1; Q9NRA0
GO_BIOLOGICAL_PROCESS	positive regulation of reactive oxygen species biosynthetic process	Oxidative Stress	41	16	1.00492e-06	1.44012e-05	AKT1; ASS1; CYBA; DNM2; EDN1; FOXO3; ICAM1; INSR; ITGB2; JAK2; MTOR; PTGS2; PTK2B; SMAD3; TNF; TRPV1	O43524; O60674; P00966; P01375; P05107; P05305; P05362; P06213; P13498; P31749; P35354; P42345; P50570; P84022; Q14289; Q8NER1
GO_BIOLOGICAL_PROCESS	cellular response to reactive oxygen species	Oxidative Stress	98	26	3.03717e-06	3.95107e-05	ABL1; AKT1; CHUK; CRK; DNM2; EGFR; ETS1; FOS; FOXO1; JUN; MAPK1; MAPK13; MAPK3; MAPK8; MAPK9; MMP2; MMP9; NCF1; PRKAA1; PRKCD; PXN; SPHK1; SRC; STAT6; TNFAIP3; TRAF2	O15111; O15264; P00519; P00533; P01100; P05412; P08253; P12931; P14598; P14780; P14921; P21580; P27361; P28482; P31749; P42226; P45983; P45984; P46108; P49023; P50570; Q05655; Q12778; Q12933; Q13131; Q9NYA1
GO_BIOLOGICAL_PROCESS	regulation of nitric oxide biosynthetic process	Oxidative Stress	49	17	3.15593e-06	4.07607e-05	AKT1; ASS1; DNM2; EDN1; ICAM1; IL10; INSR; ITGB2; JAK2; MTOR; PTGS2; PTK2B; RAC1; ROCK2; SMAD3; TNF; TRPV1	O60674; O75116; P00966; P01375; P05107; P05305; P05362; P06213; P22301; P31749; P35354; P42345; P50570; P63000; P84022; Q14289; Q8NER1
GO_BIOLOGICAL_PROCESS	positive regulation of nitric oxide biosynthetic process	Oxidative Stress	35	14	3.41503e-06	4.36371e-05	AKT1; ASS1; DNM2; EDN1; ICAM1; INSR; ITGB2; JAK2; MTOR; PTGS2; PTK2B; SMAD3; TNF; TRPV1	O60674; P00966; P01375; P05107; P05305; P05362; P06213; P31749; P35354; P42345; P50570; P84022; Q14289; Q8NER1
GO_BIOLOGICAL_PROCESS	positive regulation of nitric oxide metabolic process	Oxidative Stress	35	14	3.41503e-06	4.36371e-05	AKT1; ASS1; DNM2; EDN1; ICAM1; INSR; ITGB2; JAK2; MTOR; PTGS2; PTK2B; SMAD3; TNF; TRPV1	O60674; P00966; P01375; P05107; P05305; P05362; P06213; P31749; P35354; P42345; P50570; P84022; Q14289; Q8NER1
GO_BIOLOGICAL_PROCESS	regulation of nitric oxide metabolic process	Oxidative Stress	50	17	4.33682e-06	5.36989e-05	AKT1; ASS1; DNM2; EDN1; ICAM1; IL10; INSR; ITGB2; JAK2; MTOR; PTGS2; PTK2B; RAC1; ROCK2; SMAD3; TNF; TRPV1	O60674; O75116; P00966; P01375; P05107; P05305; P05362; P06213; P22301; P31749; P35354; P42345; P50570; P63000; P84022; Q14289; Q8NER1
GO_BIOLOGICAL_PROCESS	regulation of oxidoreductase activity	Oxidative Stress	76	20	4.79338e-05	0.000470648	ABL1; ABL2; AKT1; CYBA; DNM2; EDN1; EGFR; GNAI2; GNAI3; HIF1A; KRAS; LEP; NFKB1; PDK1; PIK3CB; PTK2B; SPHK2; TERT; TNF; WASL	O00401; O14746; P00519; P00533; P01116; P01375; P04899; P05305; P08754; P13498; P19838; P31749; P41159; P42338; P42684; P50570; Q14289; Q15118; Q16665; Q9NRA0
GO_BIOLOGICAL_PROCESS	response to hydrogen peroxide	Oxidative Stress	96	23	6.65284e-05	0.000621233	ABL1; BAD; BCL2; CASP3; CRK; ETS1; FOSL1; FOXO1; FYN; GNAO1; HMOX1; JUN; LDHA; MAPK13; PPP2CB; PRKAA1; PRKCD; PTK2B; SLC8A1; SPHK1; SRC; STAT6; TNFAIP3	O15264; P00338; P00519; P05412; P06241; P09471; P09601; P10415; P12931; P14921; P15407; P21580; P32418; P42226; P42574; P46108; P62714; Q05655; Q12778; Q13131; Q14289; Q92934; Q9NYA1
GO_BIOLOGICAL_PROCESS	regulation of superoxide anion generation	Oxidative Stress	20	9	6.7011e-05	0.000621233	CRP; CYBA; EGFR; GNAI2; GNAI3; ITGB2; PRKCD; SYK; TGFB1	P00533; P01137; P02741; P04899; P05107; P08754; P13498; P43405; Q05655
GO_BIOLOGICAL_PROCESS	respiratory burst	Oxidative Stress	13	9	5.51541e-07	8.40633e-06	CYBA; CYBB; HCK; NCF1; NCF2; NCF4; NOX1; PIK3CD; PIK3CG	O00329; P04839; P08631; P13498; P14598; P19878; P48736; Q15080; Q9Y5S8
GO_BIOLOGICAL_PROCESS	cyclic nucleotide biosynthetic process	Signaling and pathways	19	10	4.43342e-06	5.45198e-05	ADCY1; ADCY2; ADCY3; ADCY4; ADCY5; ADCY6; ADCY7; ADCY8; ADCY9; NPPA	O43306; O60266; O60503; O95622; P01160; P40145; P51828; Q08462; Q08828; Q8NFM4
GO_BIOLOGICAL_PROCESS	cyclic purine nucleotide metabolic process	Signaling and pathways	19	10	4.43342e-06	5.45198e-05	ADCY1; ADCY2; ADCY3; ADCY4; ADCY5; ADCY6; ADCY7; ADCY8; ADCY9; NPPA	O43306; O60266; O60503; O95622; P01160; P40145; P51828; Q08462; Q08828; Q8NFM4
GO_BIOLOGICAL_PROCESS	JAK-STAT cascade	Signaling and pathways	36	13	2.83537e-05	0.000296477	CCL2; CCR2; IL21; JAK2; JAK3; LEP; STAT1; STAT2; STAT3; STAT4; STAT5A; STAT5B; STAT6	O60674; P13500; P40763; P41159; P41597; P42224; P42226; P42229; P51692; P52333; P52630; Q14765; Q9HBE4
GO_BIOLOGICAL_PROCESS	STAT cascade	Signaling and pathways	36	13	2.83537e-05	0.000296477	CCL2; CCR2; IL21; JAK2; JAK3; LEP; STAT1; STAT2; STAT3; STAT4; STAT5A; STAT5B; STAT6	O60674; P13500; P40763; P41159; P41597; P42224; P42226; P42229; P51692; P52333; P52630; Q14765; Q9HBE4
GO_BIOLOGICAL_PROCESS	regulation of phospholipase activity	Signaling and pathways	57	17	3.10714e-05	0.000319783	ABL1; ABL2; BDNF; CCL5; EGFR; ESR1; FLT1; GNA13; HRAS; ITK; PDPK1; PLA2G1B; PLCB2; PLCG1; PRKCZ; RASGRP1; TXK	O15530; O95267; P00519; P00533; P01112; P03372; P04054; P13501; P17948; P19174; P23560; P42681; P42684; Q00722; Q05513; Q08881; Q14344
GO_BIOLOGICAL_PROCESS	activation of GTPase activity	Signaling and pathways	39	13	7.46762e-05	0.000677453	AKT2; CCR7; CRK; CRKL; NGEF; PIP5K1A; PTK2B; RAPGEF1; RASGRP1; TBC1D4; TBC1D7; TIAM1; TSC1	O60343; O95267; P31751; P32248; P46108; P46109; Q13009; Q13905; Q14289; Q8N5V2; Q92574; Q99755; Q9P0N9
GO_BIOLOGICAL_PROCESS	cyclic nucleotide metabolic process	Signaling and pathways	30	11	0.000100583	0.000882428	ADCY1; ADCY2; ADCY3; ADCY4; ADCY5; ADCY6; ADCY7; ADCY8; ADCY9; NPPA; PTHLH	O43306; O60266; O60503; O95622; P01160; P12272; P40145; P51828; Q08462; Q08828; Q8NFM4
GO_BIOLOGICAL_PROCESS	regulation of generation of precursor metabolites and energy	Signaling and pathways	84	29	1.1684e-09	2.72905e-08	AKT1; AKT2; DDIT4; EP300; GSK3A; GSK3B; HIF1A; INSR; IRS2; MTOR; NOS2; PIK3CA; PPARA; PPARGC1A; PPP1CA; PPP1CB; PPP1R3A; PPP1R3B; PPP1R3C; PPP1R3D; PPP1R3E; PRKAA1; PRKAA2; PRKAG1; PRKAG2; PSEN1; RHOA; SPHK2; STAT3	O95685; P06213; P31749; P31751; P35228; P40763; P42336; P42345; P49768; P49840; P49841; P54619; P54646; P61586; P62136; P62140; Q07869; Q09472; Q13131; Q16665; Q16821; Q86XI6; Q9H7J1; Q9NRA0; Q9NX09; Q9UBK2; Q9UGJ0; Q9UQK1; Q9Y4H2
GO_BIOLOGICAL_PROCESS	positive regulation of GTPase activity	Signaling and pathways	173	45	1.36072e-09	3.13751e-08	AFDN; AKT2; ARHGEF6; CCL11; CCL17; CCL2; CCL3; CCL5; CCR7; CD40; CRK; CRKL; DOCK1; DOCK2; F2R; GNAO1; GNB5; GSK3B; HRAS; ICAM1; IQGAP2; IQGAP3; JUN; NCKAP1L; NGEF; NRP1; PIP5K1A; PLCB1; PREX1; PTK2B; RALBP1; RAP1A; RAPGEF1; RASA1; RASGRP1; RASGRP3; RIN1; SOS1; TBC1D4; TBC1D7; TIAM1; TSC1; TSC2; VAV1; VAV3	O14775; O14786; O60343; O95267; P01112; P05362; P05412; P09471; P10147; P13500; P13501; P15498; P20936; P25116; P25942; P31751; P32248; P46108; P46109; P49815; P49841; P51671; P55160; P55196; P62834; Q07889; Q13009; Q13576; Q13671; Q13905; Q14185; Q14289; Q15052; Q15311; Q86VI3; Q8IV61; Q8N5V2; Q8TCU6; Q92574; Q92583; Q92608; Q99755; Q9NQ66; Q9P0N9; Q9UKW4
GO_BIOLOGICAL_PROCESS	protein autophosphorylation	Signaling and pathways	139	39	1.71392e-09	3.86518e-08	ABL1; AKT1; EEF2K; EGFR; EPHB4; FLT1; FYN; GSK3B; HCK; INSR; ITK; JAK2; KDR; MAP2K2; MAP3K11; MAP3K3; MAPK3; MAPKAPK2; MAPKAPK3; MKNK1; MKNK2; MOS; MTOR; MYLK2; PAK1; PAK2; PDPK1; PIM1; PRKCG; PRKD1; PRKD2; PTK2; PTK2B; SRC; SYK; TXK; ULK1; ULK2; ZAP70	O00418; O15530; O60674; O75385; P00519; P00533; P00540; P05129; P06213; P06241; P08631; P11309; P12931; P17948; P27361; P31749; P35968; P36507; P42345; P42681; P43403; P43405; P49137; P49841; P54760; Q05397; Q08881; Q13153; Q13177; Q14289; Q15139; Q16584; Q16644; Q8IYT8; Q99759; Q9BUB5; Q9BZL6; Q9H1R3; Q9HBH9
GO_BIOLOGICAL_PROCESS	energy reserve metabolic process	Signaling and pathways	39	18	8.77305e-09	1.82937e-07	AKT1; AKT2; G6PC; GSK3A; GSK3B; LEP; MTOR; MYC; PPP1CA; PPP1CB; PPP1CC; PPP1R3A; PPP1R3B; PPP1R3C; PPP1R3D; PPP1R3E; PRKAG2; PRKAG3	O95685; P01106; P31749; P31751; P35575; P36873; P41159; P42345; P49840; P49841; P62136; P62140; Q16821; Q86XI6; Q9H7J1; Q9UGI9; Q9UGJ0; Q9UQK1
GO_BIOLOGICAL_PROCESS	cAMP biosynthetic process	Signaling and pathways	10	9	1.02464e-08	2.12429e-07	ADCY1; ADCY2; ADCY3; ADCY4; ADCY5; ADCY6; ADCY7; ADCY8; ADCY9	O43306; O60266; O60503; O95622; P40145; P51828; Q08462; Q08828; Q8NFM4
GO_BIOLOGICAL_PROCESS	glycogen metabolic process	Signaling and pathways	32	15	1.21647e-07	2.08363e-06	AKT1; AKT2; G6PC; GSK3A; GSK3B; PPP1CA; PPP1CB; PPP1CC; PPP1R3A; PPP1R3B; PPP1R3C; PPP1R3D; PPP1R3E; PRKAG2; PRKAG3	O95685; P31749; P31751; P35575; P36873; P49840; P49841; P62136; P62140; Q16821; Q86XI6; Q9H7J1; Q9UGI9; Q9UGJ0; Q9UQK1
GO_BIOLOGICAL_PROCESS	response to cAMP	Signaling and pathways	69	21	2.54858e-06	3.38274e-05	ASS1; BIRC2; CARM1; CFTR; EEF2K; EZR; FOS; FOSB; FOSL1; JUN; LDHA; NOX4; PIK3CG; PTK2B; RAP1A; RAP1B; RAPGEF1; SLC6A3; SLC8A1; STAT1; TYR	O00418; P00338; P00966; P01100; P05412; P13569; P14679; P15311; P15407; P32418; P42224; P48736; P53539; P61224; P62834; Q01959; Q13490; Q13905; Q14289; Q86X55; Q9NPH5
GO_BIOLOGICAL_PROCESS	regulation of cellular amide metabolic process	Signaling and pathways	175	38	3.89249e-06	4.92136e-05	AKT1; AKT2; ATF4; BCL3; BIN1; CASP3; CCL5; CDK4; CYFIP1; EIF4E; FOXO3; GSK3A; HSPB1; KRT17; MAPK1; MAPK3; MKNK1; MKNK2; MTOR; NCK2; PDK1; PLA2G6; PLD1; PPP1CA; PRKAA1; PRKCD; PTK2B; RHOA; ROCK2; RPS6KA1; RPS6KA3; RPS6KB1; RPS6KB2; SPHK1; SPHK2; STAT3; TNF; TSC1	O00499; O43524; O43639; O60733; O75116; P01375; P04792; P06730; P11802; P13501; P18848; P20749; P23443; P27361; P28482; P31749; P31751; P40763; P42345; P42574; P49840; P51812; P61586; P62136; Q04695; Q05655; Q13131; Q13393; Q14289; Q15118; Q15418; Q7L576; Q92574; Q9BUB5; Q9HBH9; Q9NRA0; Q9NYA1; Q9UBS0
GO_BIOLOGICAL_PROCESS	ERK1 and ERK2 cascade	Signaling and pathways	25	11	1.3218e-05	0.000150459	CCL11; IQGAP3; ITGAV; KDR; MAP2K1; MAP2K2; MAPK1; MAPK3; MED1; MYC; TNFSF11	O14788; P01106; P06756; P27361; P28482; P35968; P36507; P51671; Q02750; Q15648; Q86VI3
GO_BIOLOGICAL_PROCESS	positive regulation of NF-kappaB transcription factor activity	Signaling and pathways	123	28	3.0126e-05	0.000311388	AMH; BTK; CARM1; CD40; CD40LG; CHUK; CLOCK; ICAM1; IKBKB; IKBKG; ITGB2; KRAS; MAP3K7; NFKB1; NFKB2; NLRP3; PLA2G1B; PRKCB; PRKCI; PRKCZ; PRKD1; PRKD2; RPS6KA5; SPHK1; STAT3; TNF; TNFSF11; TRAF2	O14788; O14920; O15111; O15516; O43318; O75582; P01116; P01375; P03971; P04054; P05107; P05362; P05771; P19838; P25942; P29965; P40763; P41743; Q00653; Q05513; Q06187; Q12933; Q15139; Q86X55; Q96P20; Q9BZL6; Q9NYA1; Q9Y6K9
GO_BIOLOGICAL_PROCESS	establishment or maintenance of transmembrane electrochemical gradient	Permeability	12	9	1.86534e-07	3.09199e-06	ATP1A1; ATP1A2; ATP1A3; ATP1A4; ATP1B1; ATP1B2; ATP1B3; BAX; FXYD2	P05023; P05026; P13637; P14415; P50993; P54709; P54710; Q07812; Q13733
GO_BIOLOGICAL_PROCESS	regulation of cell-substrate adhesion	Adhesion, cytoskeleton and junction	139	41	1.16909e-10	3.10348e-09	ABL1; ACTG1; BCL2; BCL6; CCR7; CDC42; CDK6; CDKN2A; CRK; CRKL; CSF1; DNM2; DOCK1; GSK3B; ILK; JAK2; KDR; LGALS1; MMP14; NRP1; PIK3CB; PIK3R1; PLAU; PREX1; PRKCE; PRKCZ; PTK2; PTK2B; RAC1; RAC2; RAC3; RASA1; RHOA; ROCK2; RRAS; SERPINE1; SLC9A1; SMAD3; SRC; TSC1; VEGFA	O14786; O60674; O75116; P00519; P00749; P05121; P09382; P09603; P10301; P10415; P12931; P15153; P15692; P19634; P20936; P27986; P32248; P35968; P41182; P42338; P42771; P46108; P46109; P49841; P50281; P50570; P60763; P60953; P61586; P63000; P63261; P84022; Q00534; Q02156; Q05397; Q05513; Q13418; Q14185; Q14289; Q8TCU6; Q92574
GO_BIOLOGICAL_PROCESS	regulation of cell-matrix adhesion	Adhesion, cytoskeleton and junction	84	30	2.30214e-10	6.00058e-09	ABL1; ACTG1; BCL2; BCL6; CCR7; CDK6; CDKN2A; CSF1; GSK3B; ILK; KDR; MMP14; NRP1; PIK3CB; PIK3R1; PLAU; PRKCZ; PTK2; PTK2B; RAC1; RASA1; RHOA; ROCK2; RRAS; SERPINE1; SLC9A1; SMAD3; SRC; TSC1; VEGFA	O14786; O75116; P00519; P00749; P05121; P09603; P10301; P10415; P12931; P15692; P19634; P20936; P27986; P32248; P35968; P41182; P42338; P42771; P49841; P50281; P61586; P63000; P63261; P84022; Q00534; Q05397; Q05513; Q13418; Q14289; Q92574
GO_BIOLOGICAL_PROCESS	positive regulation of cell-substrate adhesion	Adhesion, cytoskeleton and junction	77	24	2.97178e-07	4.72986e-06	ABL1; CCR7; CDC42; CDK6; CRK; CRKL; CSF1; DNM2; DOCK1; GSK3B; ILK; JAK2; KDR; NRP1; PREX1; PRKCE; PRKCZ; PTK2B; RAC1; RAC3; RRAS; SMAD3; TSC1; VEGFA	O14786; O60674; P00519; P09603; P10301; P15692; P32248; P35968; P46108; P46109; P49841; P50570; P60763; P60953; P63000; P84022; Q00534; Q02156; Q05513; Q13418; Q14185; Q14289; Q8TCU6; Q92574
GO_BIOLOGICAL_PROCESS	positive regulation of cell-matrix adhesion	Adhesion, cytoskeleton and junction	39	15	2.73483e-06	3.60337e-05	ABL1; CCR7; CDK6; CSF1; GSK3B; ILK; KDR; NRP1; PRKCZ; PTK2B; RAC1; RRAS; SMAD3; TSC1; VEGFA	O14786; P00519; P09603; P10301; P15692; P32248; P35968; P49841; P63000; P84022; Q00534; Q05513; Q13418; Q14289; Q92574
GO_BIOLOGICAL_PROCESS	positive regulation of epithelial cell migration	Permeability	109	43	3.33067e-16	1.66395e-14	ABL1; AKT1; AKT3; ARF6; BCAR1; BMPR2; CD40; DOCK1; EDN1; ETS1; HBEGF; HIF1A; HMOX1; HSPB1; ITGB3; JUN; KDR; MAP2K3; MAP3K3; MAPK14; MMP9; MTOR; NRP1; NRP2; PDPK1; PIK3CB; PIK3CD; PIK3CG; PLCG1; PLCG2; PRKCA; PRKCE; PRKD1; PRKD2; PTGS2; PTK2B; RAC1; ROCK2; RRAS; SRC; STAT5A; TGFB1; VEGFA	O00329; O14786; O15530; O60462; O75116; P00519; P01137; P04792; P05106; P05305; P05412; P09601; P10301; P12931; P14780; P14921; P15692; P16885; P17252; P19174; P25942; P31749; P35354; P35968; P42229; P42338; P42345; P46734; P48736; P56945; P62330; P63000; Q02156; Q13873; Q14185; Q14289; Q15139; Q16539; Q16665; Q99075; Q99759; Q9BZL6; Q9Y243
GO_BIOLOGICAL_PROCESS	positive regulation of endothelial cell migration	Permeability	80	34	3.66374e-14	1.45618e-12	ABL1; AKT1; AKT3; BCAR1; BMPR2; CD40; EDN1; ETS1; HIF1A; HMOX1; HSPB1; ITGB3; KDR; MAP2K3; MAP3K3; MAPK14; NRP1; NRP2; PDPK1; PIK3CB; PIK3CD; PIK3CG; PLCG1; PRKCA; PRKD1; PRKD2; PTGS2; PTK2B; RAC1; ROCK2; RRAS; STAT5A; TGFB1; VEGFA	O00329; O14786; O15530; O60462; O75116; P00519; P01137; P04792; P05106; P05305; P09601; P10301; P14921; P15692; P17252; P19174; P25942; P31749; P35354; P35968; P42229; P42338; P46734; P48736; P56945; P63000; Q13873; Q14289; Q15139; Q16539; Q16665; Q99759; Q9BZL6; Q9Y243
GO_BIOLOGICAL_PROCESS	regulation of epithelial cell migration	Permeability	164	46	5.55467e-11	1.55487e-09	ABL1; AKT1; AKT3; ARF6; BCAR1; BMPR2; CD40; DOCK1; EDN1; ETS1; HBEGF; HIF1A; HMOX1; HSPB1; ITGB3; JUN; KDR; MAP2K3; MAP3K3; MAPK14; MMP9; MTOR; NRP1; NRP2; PDPK1; PIK3CB; PIK3CD; PIK3CG; PLCG1; PLCG2; PRKCA; PRKCE; PRKD1; PRKD2; PTGS2; PTK2; PTK2B; RAC1; RHOA; ROCK2; RRAS; SRC; STAT5A; TGFB1; TNF; VEGFA	O00329; O14786; O15530; O60462; O75116; P00519; P01137; P01375; P04792; P05106; P05305; P05412; P09601; P10301; P12931; P14780; P14921; P15692; P16885; P17252; P19174; P25942; P31749; P35354; P35968; P42229; P42338; P42345; P46734; P48736; P56945; P61586; P62330; P63000; Q02156; Q05397; Q13873; Q14185; Q14289; Q15139; Q16539; Q16665; Q99075; Q99759; Q9BZL6; Q9Y243
GO_BIOLOGICAL_PROCESS	regulation of epithelial cell apoptotic process	Permeability	67	24	1.41689e-08	2.89577e-07	ABL1; BAD; CCL2; CD40; CD40LG; FOXO3; GSN; HMOX1; ICAM1; IL10; JAK2; KDR; MTOR; PAK4; PDPK1; PLA2G1B; PLCG1; PPARA; PPARGC1A; PRKCI; SERPINE1; TERT; TNF; TNFAIP3	O14746; O15530; O43524; O60674; O96013; P00519; P01375; P04054; P05121; P05362; P06396; P09601; P13500; P19174; P21580; P22301; P25942; P29965; P35968; P41743; P42345; Q07869; Q92934; Q9UBK2
GO_BIOLOGICAL_PROCESS	tissue homeostasis	Permeability	119	27	4.44059e-05	0.000441237	ACTB; ACTG1; AKT3; ATP1B2; BAX; BCL2; CCR2; CSF1; CTSK; F2R; GJA1; HSPB1; KRAS; MUC4; NOX4; PTGS2; PTK2B; PTPN11; RAC1; RAC2; RAC3; RB1; SLC2A1; SRC; TFF1; TNFSF11; VEGFA	O14788; P01116; P04155; P04792; P06400; P09603; P10415; P11166; P12931; P14415; P15153; P15692; P17302; P25116; P35354; P41597; P43235; P60709; P60763; P63000; P63261; Q06124; Q07812; Q14289; Q99102; Q9NPH5; Q9Y243
GO_BIOLOGICAL_PROCESS	phosphatidylinositol-mediated signaling	Signaling and pathways	51	20	3.96656e-08	7.26093e-07	AKT1; EDN1; EZR; GAB2; GSN; IRS2; PIK3CA; PIK3CB; PIK3CD; PIK3CG; PIK3R1; PIK3R2; PIK3R5; PLCB1; PLCB2; PLCB3; PLCB4; PLCE1; RHOA; RPS6KB1	O00329; O00459; P05305; P06396; P15311; P23443; P27986; P31749; P42336; P42338; P48736; P61586; Q00722; Q01970; Q15147; Q8WYR1; Q9NQ66; Q9P212; Q9UQC2; Q9Y4H2
GO_BIOLOGICAL_PROCESS	phosphatidylinositol metabolic process	Signaling and pathways	62	22	6.98853e-08	1.23224e-06	PIK3CA; PIK3CB; PIK3CD; PIK3CG; PIK3R1; PIK3R2; PIK3R3; PIK3R5; PIK3R6; PIP5K1A; PIP5K1B; PIP5K1C; PLA2G1B; PLA2G2A; PLA2G4A; PLAAT3; PLCB1; PLCB2; PLCB3; PLCG1; PLCG2; PTPN13	O00329; O00459; O14986; O60331; P04054; P14555; P16885; P19174; P27986; P42336; P42338; P47712; P48736; P53816; Q00722; Q01970; Q12923; Q5UE93; Q8WYR1; Q92569; Q99755; Q9NQ66
GO_BIOLOGICAL_PROCESS	Ras protein signal transduction	Signaling and pathways	116	49	0	0	ABI2; BCL6; BRK1; CDC42; CDKN1A; CDKN2A; CHUK; CRKL; CYFIP1; FARP2; GNA13; GNB1; GRB2; HRAS; IQGAP3; JUN; KRAS; LIMK1; MAPK11; MAPK14; MRAS; NCKAP1; NRAS; PLCE1; PLD1; PRKD1; RAC1; RAC2; RALGDS; RAP1A; RAP1B; RAPGEF1; RASGRP1; RASGRP3; RASSF1; RB1; RGL2; RHOA; ROCK2; RRAS; RRAS2; SHC1; SHC2; SHC3; SOS1; TIAM1; WAS; WASF1; WASF2	O14807; O15111; O15211; O75116; O94887; O95267; P01111; P01112; P01116; P05412; P06400; P10301; P15153; P29353; P38936; P41182; P42768; P42771; P46109; P53667; P60953; P61224; P61586; P62070; P62834; P62873; P62993; P63000; P98077; Q07889; Q12967; Q13009; Q13393; Q13905; Q14344; Q15139; Q15759; Q16539; Q7L576; Q86VI3; Q8IV61; Q8WUW1; Q92529; Q92558; Q9NS23; Q9NYB9; Q9P212; Q9Y2A7; Q9Y6W5
GO_BIOLOGICAL_PROCESS	positive regulation of supramolecular fiber organization	Remodelling, survival and endothelial damage	118	43	1.05471e-14	4.4897e-13	ABI2; ABL1; ARF6; ARPC1B; ARPC3; BAIAP2; BIN1; BRK1; CCL11; CCR7; CDC42; CDKN1B; CYFIP1; EDN1; GRB2; GSN; HCK; ICAM1; IQGAP2; LIMK1; MTOR; MYLK3; NCK2; NCKAP1; NCKAP1L; NOX4; NRP1; PAK1; PRKCE; PSEN1; PTK2B; PXN; RAC1; RB1; RHOA; ROCK2; SMAD3; TRPV4; WAS; WASF1; WASF2; WASF3; WASL	O00401; O00499; O14786; O15143; O15145; O43639; O75116; P00519; P05305; P05362; P06396; P06400; P08631; P32248; P42345; P42768; P46527; P49023; P49768; P51671; P53667; P55160; P60953; P61586; P62330; P62993; P63000; P84022; Q02156; Q13153; Q13576; Q14289; Q32MK0; Q7L576; Q8WUW1; Q92558; Q9HBA0; Q9NPH5; Q9NYB9; Q9UPY6; Q9UQB8; Q9Y2A7; Q9Y6W5
GO_BIOLOGICAL_PROCESS	regulation of supramolecular fiber organization	Remodelling, survival and endothelial damage	199	55	1.22968e-12	4.21254e-11	ABI2; ABL1; ACTG1; ARF6; ARPC1B; ARPC3; BAIAP2; BIN1; BRK1; CCL11; CCR7; CDC42; CDKN1B; CYFIP1; CYFIP2; EDN1; GRB2; GSN; HCK; ICAM1; IQGAP2; LIMK1; MTOR; MYLK3; NCK2; NCKAP1; NCKAP1L; NOX4; NRP1; PAK1; PAK2; PAK3; PIK3CA; PIK3R1; PREX1; PRKCD; PRKCE; PSEN1; PTK2B; PXN; RAC1; RASA1; RB1; RHOA; ROCK2; SLC9A1; SMAD3; SMAD4; TRPV4; TSC1; WAS; WASF1; WASF2; WASF3; WASL	O00401; O00499; O14786; O15143; O15145; O43639; O75116; O75914; P00519; P05305; P05362; P06396; P06400; P08631; P19634; P20936; P27986; P32248; P42336; P42345; P42768; P46527; P49023; P49768; P51671; P53667; P55160; P60953; P61586; P62330; P62993; P63000; P63261; P84022; Q02156; Q05655; Q13153; Q13177; Q13485; Q13576; Q14289; Q32MK0; Q7L576; Q8TCU6; Q8WUW1; Q92558; Q92574; Q96F07; Q9HBA0; Q9NPH5;…
GO_BIOLOGICAL_PROCESS	regulation of stress fiber assembly	Remodelling, survival and endothelial damage	54	19	6.44484e-07	9.71996e-06	ABL1; ACTG1; CDC42; LIMK1; MTOR; NOX4; NRP1; PAK1; PAK2; PIK3R1; PXN; RAC1; RHOA; ROCK2; SLC9A1; SMAD3; TSC1; WAS; WASF2	O14786; O75116; P00519; P19634; P27986; P42345; P42768; P49023; P53667; P60953; P61586; P63000; P63261; P84022; Q13153; Q13177; Q92574; Q9NPH5; Q9Y6W5
GO_BIOLOGICAL_PROCESS	regulation of neuron apoptotic process	Retynopathy and glia-related	150	45	7.21001e-12	2.30528e-10	ATF2; ATF4; BAX; BCL2; BCL2L1; BCL2L11; BDNF; CASP3; CASP9; CCL2; CCL3; CDC42; CEBPB; EGLN2; EGLN3; F2R; FOXO3; FYN; GSK3A; HIF1A; HMOX1; HRAS; IL10; ILK; JAK2; JUN; KRAS; MAP2K4; MAP3K11; MCL1; NEFL; NRP1; PAK3; PDPK1; PIK3CA; PPARGC1A; PRKCG; PRKCI; PSEN1; PTK2B; RASA1; RHOA; TERT; TNF; UNC5B	O14746; O14786; O15530; O43521; O43524; O60674; O75914; P01112; P01116; P01375; P05129; P05412; P06241; P07196; P09601; P10147; P10415; P13500; P15336; P17676; P18848; P20936; P22301; P23560; P25116; P41743; P42336; P42574; P45985; P49768; P49840; P55211; P60953; P61586; Q07812; Q07817; Q07820; Q13418; Q14289; Q16584; Q16665; Q8IZJ1; Q96KS0; Q9H6Z9; Q9UBK2
GO_BIOLOGICAL_PROCESS	positive regulation of neuron apoptotic process	Retynopathy and glia-related	50	17	4.33682e-06	5.36989e-05	ATF2; ATF4; BAX; BCL2L11; CASP3; CASP9; CCL3; CDC42; FOXO3; GSK3A; JUN; MAP2K4; MAP3K11; MCL1; PAK3; RHOA; TNF	O43521; O43524; O75914; P01375; P05412; P10147; P15336; P18848; P42574; P45985; P49840; P55211; P60953; P61586; Q07812; Q07820; Q16584
GO_BIOLOGICAL_PROCESS	positive regulation of MAP kinase activity	Signaling and pathways	192	54	9.25704e-13	3.20169e-11	CD40; CD40LG; CRKL; CXCR4; EDN1; EGFR; FLT1; GNG3; HRAS; IKBKG; ILK; INSR; IQGAP3; KRAS; MAP2K1; MAP2K2; MAP2K3; MAP2K4; MAP2K6; MAP2K7; MAP3K11; MAP3K7; MAPK1; MAPK10; MAPK11; MAPK14; MAPK3; MAPKAPK2; MAPKAPK3; MOS; NOX4; PAK1; PAK3; PIK3CB; PIK3CG; PIK3R5; PIK3R6; PLA2G1B; PLCE1; PRKAA1; PTK2B; PTPN11; RASGRP1; SHC1; SHC2; SRC; SYK; TGFA; TGFB1; TIAM1; TNF; TNFSF11; TRAF2; VEGFA	O14733; O14788; O43318; O75914; O95267; P00533; P00540; P01112; P01116; P01135; P01137; P01375; P04054; P05305; P06213; P12931; P15692; P17948; P25942; P27361; P28482; P29353; P29965; P36507; P42338; P43405; P45985; P46109; P46734; P48736; P49137; P52564; P53779; P61073; P63215; P98077; Q02750; Q06124; Q12933; Q13009; Q13131; Q13153; Q13418; Q14289; Q15759; Q16539; Q16584; Q16644; Q5UE93; Q86VI3;…
GO_BIOLOGICAL_PROCESS	activation of MAPK activity	Signaling and pathways	123	35	8.06373e-09	1.69127e-07	CD40LG; CRKL; CXCR4; GNG3; IKBKG; INSR; IQGAP3; MAP2K1; MAP2K2; MAP2K3; MAP2K4; MAP2K6; MAP2K7; MAP3K11; MAP3K7; MAPK1; MAPK10; MAPK11; MAPK14; MAPK3; MAPKAPK2; MAPKAPK3; MOS; PAK3; PIK3CB; PLA2G1B; PLCE1; PRKAA1; PTPN11; SHC1; SHC2; SYK; TGFA; TNF; TNFSF11	O14733; O14788; O43318; O75914; P00540; P01135; P01375; P04054; P06213; P27361; P28482; P29353; P29965; P36507; P42338; P43405; P45985; P46109; P46734; P49137; P52564; P53779; P61073; P63215; P98077; Q02750; Q06124; Q13131; Q15759; Q16539; Q16584; Q16644; Q86VI3; Q9P212; Q9Y6K9
GO_BIOLOGICAL_PROCESS	activation of MAPKK activity	Signaling and pathways	41	18	2.3366e-08	4.51868e-07	BRAF; CRK; CRKL; EGFR; F2R; JAK2; MAP3K1; MAP3K11; MAP3K14; MAP3K3; MAP3K7; MAP3K8; MAPK1; MAPK3; MOS; PSEN1; RAF1; RAPGEF1	O43318; O60674; P00533; P00540; P04049; P15056; P25116; P27361; P28482; P41279; P46108; P46109; P49768; Q13233; Q13905; Q16584; Q99558; Q99759
GO_BIOLOGICAL_PROCESS	positive regulation of ERK1 and ERK2 cascade	Signaling and pathways	154	39	3.99574e-08	7.29577e-07	ABL1; BRAF; CCL11; CCL17; CCL2; CCL3; CCL5; CCR7; CRKL; EGFR; EPO; F2R; GATA4; GNAI2; HRAS; ICAM1; JUN; KDR; MAP2K1; MAP2K7; MAPK3; NOX4; NRP1; OPRM1; PLA2G2A; PRKCA; PRKCZ; PRKD2; PTK2B; PTPN11; RAP1A; RAP1B; RAPGEF1; RASGRP1; SHC1; SRC; TGFB1; TNF; TNFSF11	O14733; O14786; O14788; O95267; P00519; P00533; P01112; P01137; P01375; P01588; P04899; P05362; P05412; P10147; P12931; P13500; P13501; P14555; P15056; P17252; P25116; P27361; P29353; P32248; P35372; P35968; P43694; P46109; P51671; P61224; P62834; Q02750; Q05513; Q06124; Q13905; Q14289; Q92583; Q9BZL6; Q9NPH5
GO_BIOLOGICAL_PROCESS	stress-activated MAPK cascade	Signaling and pathways	82	25	2.70633e-07	4.33615e-06	ARHGEF6; CD40LG; CHUK; CRKL; IKBKB; IKBKG; MAP2K3; MAP2K4; MAP2K7; MAP3K11; MAP3K7; MAP3K8; MAPK1; MAPK10; MAPK11; MAPK13; MAPK14; MAPK3; MAPK8; MAPK9; MAPKAPK2; NFKB1; SYK; TNF; TNFSF11	O14733; O14788; O14920; O15111; O15264; O43318; P01375; P19838; P27361; P28482; P29965; P41279; P43405; P45983; P45984; P45985; P46109; P46734; P49137; P53779; Q15052; Q15759; Q16539; Q16584; Q9Y6K9
GO_BIOLOGICAL_PROCESS	regulation of stress-activated MAPK cascade	Signaling and pathways	126	29	1.73996e-05	0.000192278	AKT1; CARD9; CCR7; CDC42; EGFR; EZR; FOXM1; FOXO1; HRAS; ITCH; LEP; MAP2K1; MAP2K2; MAP3K11; MAP3K3; MAPK1; MAPK3; MYC; NCF1; NOX1; NPPA; PLCB1; PTK2B; RAPGEF1; RASGRP1; SPHK1; STK3; TRAF2; VEGFA	O95267; P00533; P01106; P01112; P01160; P14598; P15311; P15692; P27361; P28482; P31749; P32248; P36507; P41159; P60953; Q02750; Q08050; Q12778; Q12933; Q13188; Q13905; Q14289; Q16584; Q96J02; Q99759; Q9H257; Q9NQ66; Q9NYA1; Q9Y5S8
GO_BIOLOGICAL_PROCESS	regulation of phosphatidylinositol 3-kinase activity	Signaling and pathways	49	15	6.49514e-05	0.000610001	CCR7; CDC42; FLT1; PIK3R1; PIK3R2; PIK3R3; PIK3R5; PIK3R6; PRKD1; PTK2; PTK2B; SRC; TGFB1; VAV2; VAV3	O00459; P01137; P12931; P17948; P27986; P32248; P52735; P60953; Q05397; Q14289; Q15139; Q5UE93; Q8WYR1; Q92569; Q9UKW4
GO_BIOLOGICAL_PROCESS	response to purine-containing compound	Signaling and pathways	102	25	2.12659e-05	0.000230055	ASS1; BIRC2; CARM1; CFTR; EEF2K; EZR; FOS; FOSB; FOSL1; JUN; LDHA; NOX4; PIK3CG; PPARGC1A; PRKAA1; PTGS2; PTK2B; RAP1A; RAP1B; RAPGEF1; SLC6A3; SLC8A1; STAT1; TRPV1; TYR	O00418; P00338; P00966; P01100; P05412; P13569; P14679; P15311; P15407; P32418; P35354; P42224; P48736; P53539; P61224; P62834; Q01959; Q13131; Q13490; Q13905; Q14289; Q86X55; Q8NER1; Q9NPH5; Q9UBK2
GO_BIOLOGICAL_PROCESS	regulation of protein localization to membrane	Signaling and pathways	123	28	3.0126e-05	0.000311388	ACTB; AKT1; AKT2; ARF6; BAD; BCL2; BCL2L1; BID; CRKL; EGFR; EPHB2; EZR; FYN; GSN; HRAS; ITGB2; MAPK8; MMP14; PAK1; PDPK1; PIK3R1; PMAIP1; PRKCE; PRKCI; RAP1A; RHOQ; TGFB1; TNF	O15530; P00533; P01112; P01137; P01375; P05107; P06241; P06396; P10415; P15311; P17081; P27986; P29323; P31749; P31751; P41743; P45983; P46109; P50281; P55957; P60709; P62330; P62834; Q02156; Q07817; Q13153; Q13794; Q92934
GO_BIOLOGICAL_PROCESS	cell communication by electrical coupling involved in cardiac conduction	Signaling and pathways	12	7	5.54614e-05	0.000529866	ATP1A1; ATP1A2; ATP1A3; ATP1B1; ATP1B2; GJA1; SLC8A1	P05023; P05026; P13637; P14415; P17302; P32418; P50993
GO_BIOLOGICAL_PROCESS	cellular response to monosaccharide stimulus	Signaling and pathways	49	15	6.49514e-05	0.000610001	ADCY8; CYBA; FOXO3; GATA4; ICAM1; IRS2; LEP; LGALS1; NOX4; PIK3CA; PPARGC1A; PRKAA1; PRKAA2; RAF1; SLC2A5	O43524; P04049; P05362; P09382; P13498; P22732; P40145; P41159; P42336; P43694; P54646; Q13131; Q9NPH5; Q9UBK2; Q9Y4H2
GO_BIOLOGICAL_PROCESS	positive regulation of protein acetylation	Signaling and pathways	30	11	0.000100583	0.000882428	ARNTL; FOXP3; MAPK3; MUC1; NOS1; PPARGC1A; PRKAA1; PRKAA2; RPS6KA5; SMAD4; SPHK2	O00327; O75582; P15941; P27361; P29475; P54646; Q13131; Q13485; Q9BZS1; Q9NRA0; Q9UBK2
GO_BIOLOGICAL_PROCESS	small GTPase mediated signal transduction	Signaling and pathways	154	62	0	0	ABI2; BCL6; BRK1; CDC42; CDKN1A; CDKN2A; CHUK; CRKL; CYFIP1; DOCK1; DOCK2; FARP2; GNA13; GNB1; GRB2; HMOX1; HRAS; IQGAP3; JUN; KRAS; LIMK1; MAPK11; MAPK14; MRAS; NCKAP1; NRAS; PLCE1; PLD1; PLD2; PRKD1; RAC1; RAC2; RAC3; RALBP1; RALGDS; RAP1A; RAP1B; RAPGEF1; RAPGEF5; RASGRP1; RASGRP3; RASSF1; RB1; RGL1; RGL2; RHOA; RHOQ; ROCK2; RRAS; RRAS2; SHC1; SHC2; SHC3; SOS1; SOS2; TIAM1; VAV1; VAV2; VAV3; W…	O14807; O14939; O15111; O15211; O75116; O94887; O95267; P01111; P01112; P01116; P05412; P06400; P09601; P10301; P15153; P15498; P17081; P29353; P38936; P41182; P42768; P42771; P46109; P52735; P53667; P60763; P60953; P61224; P61586; P62070; P62834; P62873; P62993; P63000; P98077; Q07889; Q07890; Q12967; Q13009; Q13393; Q13905; Q14185; Q14344; Q15139; Q15311; Q15759; Q16539; Q7L576; Q86VI3; Q8IV61;…
GO_BIOLOGICAL_PROCESS	regulation of small GTPase mediated signal transduction	Signaling and pathways	163	50	1.74083e-13	6.55682e-12	ABL1; ABL2; APOC3; ARF6; ARHGEF6; BCL6; CBL; CDC42; CRK; CRKL; CSF1; EPHB2; EPO; F2R; FOXM1; GNA13; GRB2; HRAS; IRS2; JAK2; KRAS; NGEF; NRP1; PIK3CB; PIK3CG; PIK3R2; PLCE1; PPP2CB; PREX1; RAC1; RAC2; RAC3; RAF1; RALBP1; RAPGEF1; RASA1; RASGRP1; RGL2; RHOA; RHOQ; SHC1; SOS1; SOS2; SRC; TIAM1; TIMP2; TSC2; VAV1; VAV2; VAV3	O00459; O14786; O15211; O60674; O95267; P00519; P01112; P01116; P01588; P02656; P04049; P09603; P12931; P15153; P15498; P16035; P17081; P20936; P22681; P25116; P29323; P29353; P41182; P42338; P42684; P46108; P46109; P48736; P49815; P52735; P60763; P60953; P61586; P62330; P62714; P62993; P63000; Q07889; Q07890; Q08050; Q13009; Q13905; Q14344; Q15052; Q15311; Q8N5V2; Q8TCU6; Q9P212; Q9UKW4; Q9Y4H2
GO_BIOLOGICAL_PROCESS	cellular response to abiotic stimulus	Signaling and pathways	199	56	3.29958e-13	1.21108e-11	AKT1; AKT2; ATF4; ATP1A1; ATP1A2; BAD; BAX; BCL2L1; CASP3; CASP9; CD40; CDKN1A; CLOCK; CREBBP; CYBA; DNM2; EGFR; EGR1; ELK1; EP300; EPO; GJA1; GNB1; GNGT1; GRB2; HAMP; HRAS; IRF1; MAP2K4; MAP3K1; MAP3K14; MAPK10; MAPK13; MAPK14; MAPK3; MAPK8; MMP1; MMP2; MMP9; MYC; MYLK; NAMPT; NFKB1; NOX1; NOX4; NPPA; PIK3CA; PIK3R1; PTGS2; PTPN11; RAC1; SLC2A1; SLC2A4; SLC9A1; TRPV1; TRPV4	O15264; O15516; P00533; P01106; P01112; P01160; P01588; P03956; P05023; P08253; P10914; P11166; P13498; P14672; P14780; P17302; P18146; P18848; P19419; P19634; P19838; P25942; P27361; P27986; P31749; P31751; P35354; P38936; P42336; P42574; P43490; P45983; P45985; P50570; P50993; P53779; P55211; P62873; P62993; P63000; P63211; P81172; Q06124; Q07812; Q07817; Q09472; Q13233; Q15746; Q16539; Q8NER1;…
GO_BIOLOGICAL_PROCESS	cellular response to environmental stimulus	Signaling and pathways	199	56	3.29958e-13	1.21108e-11	AKT1; AKT2; ATF4; ATP1A1; ATP1A2; BAD; BAX; BCL2L1; CASP3; CASP9; CD40; CDKN1A; CLOCK; CREBBP; CYBA; DNM2; EGFR; EGR1; ELK1; EP300; EPO; GJA1; GNB1; GNGT1; GRB2; HAMP; HRAS; IRF1; MAP2K4; MAP3K1; MAP3K14; MAPK10; MAPK13; MAPK14; MAPK3; MAPK8; MMP1; MMP2; MMP9; MYC; MYLK; NAMPT; NFKB1; NOX1; NOX4; NPPA; PIK3CA; PIK3R1; PTGS2; PTPN11; RAC1; SLC2A1; SLC2A4; SLC9A1; TRPV1; TRPV4	O15264; O15516; P00533; P01106; P01112; P01160; P01588; P03956; P05023; P08253; P10914; P11166; P13498; P14672; P14780; P17302; P18146; P18848; P19419; P19634; P19838; P25942; P27361; P27986; P31749; P31751; P35354; P38936; P42336; P42574; P43490; P45983; P45985; P50570; P50993; P53779; P55211; P62873; P62993; P63000; P63211; P81172; Q06124; Q07812; Q07817; Q09472; Q13233; Q15746; Q16539; Q8NER1;…
GO_BIOLOGICAL_PROCESS	regulation of phosphatidylinositol 3-kinase signaling	Signaling and pathways	102	35	2.58296e-11	7.67842e-10	CBL; CCL5; EGFR; EPO; F2R; FLT1; FYN; GAB1; INSR; IRS2; JAK2; KDR; LEP; MAPK1; MAPK3; NCF1; PIK3CA; PIK3CB; PIK3CD; PIK3CG; PIK3R1; PIK3R5; PIP5K1A; PIP5K1B; PIP5K1C; PTK2; PTPN13; RGL2; SELP; SLC9A3R1; SRC; TNF; TSC2; TWIST1; UNC5B	O00329; O14745; O14986; O15211; O60331; O60674; P00533; P01375; P01588; P06213; P06241; P12931; P13501; P14598; P16109; P17948; P22681; P25116; P27361; P27986; P28482; P35968; P41159; P42336; P42338; P48736; P49815; Q05397; Q12923; Q13480; Q15672; Q8IZJ1; Q8WYR1; Q99755; Q9Y4H2
GO_BIOLOGICAL_PROCESS	inositol lipid-mediated signaling	Signaling and pathways	53	22	2.28749e-09	5.04792e-08	AKT1; EDN1; EZR; GAB2; GSN; IRS2; PIK3CA; PIK3CB; PIK3CD; PIK3CG; PIK3R1; PIK3R2; PIK3R5; PLCB1; PLCB2; PLCB3; PLCB4; PLCE1; PLD1; PLD2; RHOA; RPS6KB1	O00329; O00459; O14939; P05305; P06396; P15311; P23443; P27986; P31749; P42336; P42338; P48736; P61586; Q00722; Q01970; Q13393; Q15147; Q8WYR1; Q9NQ66; Q9P212; Q9UQC2; Q9Y4H2
GO_BIOLOGICAL_PROCESS	regulation of protein kinase B signaling	Signaling and pathways	179	40	9.88802e-07	1.42269e-05	AKT1; CCL3; CCR7; EGFR; ESR1; FYN; GAB1; GATA4; GRB2; HBEGF; HPSE; ILK; INSR; IRS2; LEP; MTOR; NOX4; PIK3CA; PIK3CB; PIK3CD; PIK3CG; PIK3R1; PIK3R2; PIK3R5; PPARA; PTK2; PTPN11; RAC1; RAC2; RAPGEF1; RRAS; SLC9A3R1; SRC; STK3; TGFA; TGFB1; TNF; TNFSF11; TSC2; VAV1	O00329; O00459; O14745; O14788; P00533; P01135; P01137; P01375; P03372; P06213; P06241; P10147; P10301; P12931; P15153; P15498; P27986; P31749; P32248; P41159; P42336; P42338; P42345; P43694; P48736; P49815; P62993; P63000; Q05397; Q06124; Q07869; Q13188; Q13418; Q13480; Q13905; Q8WYR1; Q99075; Q9NPH5; Q9Y251; Q9Y4H2
GO_BIOLOGICAL_PROCESS	positive regulation of protein kinase B signaling	Signaling and pathways	138	33	1.85765e-06	2.54551e-05	CCL3; CCR7; EGFR; ESR1; FYN; GAB1; GRB2; HBEGF; HPSE; ILK; INSR; IRS2; LEP; MTOR; NOX4; PIK3CA; PIK3CB; PIK3CD; PIK3CG; PIK3R1; PIK3R2; PIK3R5; PTK2; PTPN11; RAC1; RAC2; SRC; STK3; TGFA; TGFB1; TNF; TNFSF11; VAV1	O00329; O00459; O14788; P00533; P01135; P01137; P01375; P03372; P06213; P06241; P10147; P12931; P15153; P15498; P27986; P32248; P41159; P42336; P42338; P42345; P48736; P62993; P63000; Q05397; Q06124; Q13188; Q13418; Q13480; Q8WYR1; Q99075; Q9NPH5; Q9Y251; Q9Y4H2
GO_BIOLOGICAL_PROCESS	regulation of insulin receptor signaling pathway	Signaling and pathways	43	16	2.12717e-06	2.87107e-05	CCND3; CDK4; GNAI2; GSK3A; LEP; PAK1; PIK3R1; PRKAA1; PRKCB; PRKCD; PRKCZ; PTPN11; RPS6KB1; SRC; TSC1; TSC2	P04899; P05771; P11802; P12931; P23443; P27986; P30281; P41159; P49815; P49840; Q05513; Q05655; Q06124; Q13131; Q13153; Q92574
GO_BIOLOGICAL_PROCESS	integrin-mediated signaling pathway	Signaling and pathways	78	22	5.97385e-06	7.22284e-05	ABL1; BCAR1; CD40LG; CDC42; DOCK1; HCK; ILK; ITGA2B; ITGAV; ITGB2; ITGB3; NRP1; PRKD1; PTK2; PTK2B; PTPN11; SRC; SYK; TLN1; TXK; VAV1; VAV3	O14786; P00519; P05106; P05107; P06756; P08514; P08631; P12931; P15498; P29965; P42681; P43405; P56945; P60953; Q05397; Q06124; Q13418; Q14185; Q14289; Q15139; Q9UKW4; Q9Y490
GO_BIOLOGICAL_PROCESS	protein kinase B signaling	Signaling and pathways	29	12	1.14562e-05	0.000131445	AKT1; CCL2; CCL3; CCL5; CD40; ILK; KDR; PIK3CA; PIK3R3; TGFB1; TNF; TSC2	P01137; P01375; P10147; P13500; P13501; P25942; P31749; P35968; P42336; P49815; Q13418; Q92569
GO_BIOLOGICAL_PROCESS	cellular response to biotic stimulus	Signaling and pathways	160	41	1.22209e-08	2.51192e-07	ABL1; AKT1; ASS1; BCL2L11; CCL2; CCL3; CCL5; CD40; CDK4; CEBPB; CSF2; CXCL1; CXCL10; CXCL2; CXCL3; CXCL8; GSK3B; HAMP; HCK; ICAM1; IL10; IL12B; IRF3; MAPK1; MAPK14; MAPK3; MAPK8; NFKB1; NFKBIB; NLRP3; NOS2; PPARGC1A; PRKCE; RHOA; SERPINE1; SRC; SYK; TGFB1; TNF; TNFAIP3; TNFRSF1B	O43521; P00519; P00966; P01137; P01375; P02778; P04141; P05121; P05362; P08631; P09341; P10145; P10147; P11802; P12931; P13500; P13501; P17676; P19838; P19875; P19876; P20333; P21580; P22301; P25942; P27361; P28482; P29460; P31749; P35228; P43405; P45983; P49841; P61586; P81172; Q02156; Q14653; Q15653; Q16539; Q96P20; Q9UBK2
GO_BIOLOGICAL_PROCESS	positive regulation of cellular protein localization	Signaling and pathways	195	41	3.81754e-06	4.83511e-05	AKT1; AKT2; ARF6; BAD; BCL2; BID; EGFR; EPHB2; EZR; FYN; GNAI1; GSK3A; GSK3B; HRAS; ITGB2; JAK2; LEP; MAPK1; MAPK14; MAPK8; NDC80; PAK1; PARD6A; PDPK1; PIK3R1; PIK3R2; PMAIP1; PRKAA1; PRKAA2; PRKCD; PRKCE; PRKCI; PSEN1; PTGS2; RAC2; ROCK2; SMAD3; SRC; TERT; TGFB1; TNF	O00459; O14746; O14777; O15530; O60674; O75116; P00533; P01112; P01137; P01375; P05107; P06241; P10415; P12931; P15153; P15311; P27986; P28482; P29323; P31749; P31751; P35354; P41159; P41743; P45983; P49768; P49840; P49841; P54646; P55957; P62330; P63096; P84022; Q02156; Q05655; Q13131; Q13153; Q13794; Q16539; Q92934; Q9NPB6
GO_BIOLOGICAL_PROCESS	cellular response to extracellular stimulus	Signaling and pathways	165	36	6.26953e-06	7.54231e-05	ATF3; ATF4; BCL2; BMPR2; CBL; CDKN1A; CDKN2B; FOS; FOSL1; FOXA2; FOXO1; FOXO3; HMOX1; ICAM1; JUN; LEP; MAPK1; MAPK3; MAPK8; MTOR; NAMPT; PIM1; PMAIP1; PPARA; PRKAA1; PRKAA2; PRKAG1; PRKAG2; PRKAG3; PRKD1; RPTOR; SLC2A1; TSC1; ULK1; UPP1; VCAM1	O43524; O75385; P01100; P05362; P05412; P09601; P10415; P11166; P11309; P15407; P18847; P18848; P19320; P22681; P27361; P28482; P38936; P41159; P42345; P42772; P43490; P45983; P54619; P54646; Q07869; Q12778; Q13131; Q13794; Q13873; Q15139; Q16831; Q8N122; Q92574; Q9UGI9; Q9UGJ0; Q9Y261
GO_BIOLOGICAL_PROCESS	response to amino acid	Signaling and pathways	79	21	2.63592e-05	0.000279276	ASS1; BAD; BAIAP2; BCL2L1; CASP3; CDKN1B; CEBPB; CHUK; CREB1; CYBA; CYBB; EDN1; EGFR; FYN; ICAM1; MMP2; MTOR; PPARGC1A; RHOA; RPTOR; TNF	O15111; P00533; P00966; P01375; P04839; P05305; P05362; P06241; P08253; P13498; P16220; P17676; P42345; P42574; P46527; P61586; Q07817; Q8N122; Q92934; Q9UBK2; Q9UQB8
GO_BIOLOGICAL_PROCESS	regulation of protein localization to cell periphery	Signaling and pathways	68	18	0.000104934	0.000915028	ACTB; AKT1; ARF6; BCL2L1; EGFR; EPHB2; EZR; GNAI1; HRAS; MMP14; PDPK1; PIK3R1; PRKCE; PRKCI; RAP1A; RHOQ; TGFB1; TNF	O15530; P00533; P01112; P01137; P01375; P15311; P17081; P27986; P29323; P31749; P41743; P50281; P60709; P62330; P62834; P63096; Q02156; Q07817
GO_BIOLOGICAL_PROCESS	activation of protein kinase A activity	Signaling and pathways	14	9	1.40511e-06	1.97429e-05	ADCY1; ADCY2; ADCY3; ADCY4; ADCY5; ADCY6; ADCY7; ADCY8; ADCY9	O43306; O60266; O60503; O95622; P40145; P51828; Q08462; Q08828; Q8NFM4
GO_BIOLOGICAL_PROCESS	cAMP metabolic process	Signaling and pathways	18	10	2.3095e-06	3.10482e-05	ADCY1; ADCY2; ADCY3; ADCY4; ADCY5; ADCY6; ADCY7; ADCY8; ADCY9; PTHLH	O43306; O60266; O60503; O95622; P12272; P40145; P51828; Q08462; Q08828; Q8NFM4
GO_BIOLOGICAL_PROCESS	negative regulation of TOR signaling	Signaling and pathways	20	9	6.7011e-05	0.000621233	ARNTL; DDIT4; GSK3A; HIF1A; PRKAA1; PRKAA2; TBC1D7; TSC1; TSC2	O00327; P49815; P49840; P54646; Q13131; Q16665; Q92574; Q9NX09; Q9P0N9
GO_BIOLOGICAL_PROCESS	epidermal growth factor receptor signaling pathway	Signaling and pathways	40	25	8.88178e-16	4.34664e-14	ABL1; AKT1; BCAR1; BRAF; CBL; EGFR; GAB1; GRB2; HBEGF; NCK2; PDPK1; PIK3CA; PIK3R1; PLCE1; PLCG1; PTK2; PTK2B; PTPN11; RPS6KA5; SHC1; SHC3; SOS1; SRC; TGFA; TGFB1	O15530; O43639; O75582; P00519; P00533; P01135; P01137; P12931; P15056; P19174; P22681; P27986; P29353; P31749; P42336; P56945; P62993; Q05397; Q06124; Q07889; Q13480; Q14289; Q92529; Q99075; Q9P212
GO_BIOLOGICAL_PROCESS	ERBB signaling pathway	Signaling and pathways	57	27	6.90781e-13	2.43602e-11	ABL1; AKT1; BCAR1; BRAF; CBL; EGFR; GAB1; GRB2; HBEGF; MAPK1; NCK2; PDPK1; PIK3CA; PIK3R1; PLCE1; PLCG1; PRKCA; PTK2; PTK2B; PTPN11; RPS6KA5; SHC1; SHC3; SOS1; SRC; TGFA; TGFB1	O15530; O43639; O75582; P00519; P00533; P01135; P01137; P12931; P15056; P17252; P19174; P22681; P27986; P28482; P29353; P31749; P42336; P56945; P62993; Q05397; Q06124; Q07889; Q13480; Q14289; Q92529; Q99075; Q9P212
GO_BIOLOGICAL_PROCESS	regulation of Ras protein signal transduction	Signaling and pathways	106	32	7.33107e-09	1.54662e-07	ABL1; ABL2; APOC3; ARF6; BCL6; CBL; CRK; CRKL; CSF1; EPHB2; EPO; F2R; FOXM1; GRB2; HRAS; IRS2; JAK2; KRAS; NRP1; PIK3CB; PIK3CG; PLCE1; PPP2CB; RAC1; RAF1; RAPGEF1; RASA1; RASGRP1; RGL2; SHC1; TIMP2; VAV1	O14786; O15211; O60674; O95267; P00519; P01112; P01116; P01588; P02656; P04049; P09603; P15498; P16035; P20936; P22681; P25116; P29323; P29353; P41182; P42338; P42684; P46108; P46109; P48736; P62330; P62714; P62993; P63000; Q08050; Q13905; Q9P212; Q9Y4H2
GO_BIOLOGICAL_PROCESS	positive regulation of small GTPase mediated signal transduction	Signaling and pathways	51	19	2.28284e-07	3.71555e-06	CRKL; CSF1; EPO; F2R; GRB2; HRAS; IRS2; JAK2; KRAS; PIK3CB; PIK3CG; RAC1; RAPGEF1; RASGRP1; SHC1; SOS1; SOS2; SRC; VAV1	O60674; O95267; P01112; P01116; P01588; P09603; P12931; P15498; P25116; P29353; P42338; P46109; P48736; P62993; P63000; Q07889; Q07890; Q13905; Q9Y4H2
GO_BIOLOGICAL_PROCESS	stimulatory C-type lectin receptor signaling pathway	Signaling and pathways	87	24	3.47117e-06	4.42759e-05	CARD9; CHUK; CREBBP; EP300; FYN; HRAS; IKBKB; IKBKG; KRAS; MAP3K7; MUC1; MUC4; NFKB1; NRAS; PAK1; PAK2; PAK3; PDPK1; PLCG2; PRKCD; RAF1; RPS6KA5; SRC; SYK	O14920; O15111; O15530; O43318; O75582; O75914; P01111; P01112; P01116; P04049; P06241; P12931; P15941; P16885; P19838; P43405; Q05655; Q09472; Q13153; Q13177; Q92793; Q99102; Q9H257; Q9Y6K9
GO_BIOLOGICAL_PROCESS	positive regulation of Ras protein signal transduction	Signaling and pathways	45	16	4.2683e-06	5.32169e-05	CRKL; CSF1; EPO; F2R; GRB2; HRAS; IRS2; JAK2; KRAS; PIK3CB; PIK3CG; RAC1; RAPGEF1; RASGRP1; SHC1; VAV1	O60674; O95267; P01112; P01116; P01588; P09603; P15498; P25116; P29353; P42338; P46109; P48736; P62993; P63000; Q13905; Q9Y4H2
GO_BIOLOGICAL_PROCESS	regulation of signaling receptor activity	Signaling and pathways	98	24	3.15021e-05	0.000321935	CBL; CCL2; CCR2; CRH; EPHB2; ESR2; HBEGF; IL10; MED1; MUC4; NCF1; NCK2; NCOA3; NEFL; NRP1; OPRM1; PLAU; PPARGC1A; PRKCD; PSEN1; PTK2B; SERPINE1; SHC1; TGFA	O14786; O43639; P00749; P01135; P05121; P06850; P07196; P13500; P14598; P22301; P22681; P29323; P29353; P35372; P41597; P49768; Q05655; Q14289; Q15648; Q92731; Q99075; Q99102; Q9UBK2; Q9Y6Q9
GO_BIOLOGICAL_PROCESS	response to ketone	Signaling and pathways	161	44	3.76394e-10	9.53443e-09	ADCY1; ADCY2; ADCY3; ADCY5; ADCY6; ADCY8; AKT1; ASS1; BAD; BCL2L1; CASP9; CBL; CCR7; CD38; CDK4; CDKN1A; CFTR; CRH; CYBA; CYBB; DDIT4; EDN1; EGFR; EIF4E; ELK1; EPO; FOS; FOSB; FOSL1; FOXO1; FOXO3; GNAI1; GNB1; GNG2; HSD3B2; ICAM1; NEFL; PRKAA1; PRKAA2; PRKCE; ROCK2; SPHK2; SRC; TGFB1	O43306; O43524; O60266; O75116; O95622; P00533; P00966; P01100; P01137; P01588; P04839; P05305; P05362; P06730; P06850; P07196; P11802; P12931; P13498; P13569; P15407; P19419; P22681; P26439; P28907; P31749; P32248; P38936; P40145; P53539; P54646; P55211; P59768; P62873; P63096; Q02156; Q07817; Q08462; Q08828; Q12778; Q13131; Q92934; Q9NRA0; Q9NX09
GO_BIOLOGICAL_PROCESS	response to alcohol	Signaling and pathways	195	49	8.81942e-10	2.12197e-08	ADCY1; ADCY2; ADCY3; ADCY5; ADCY6; ADCY7; ADCY8; AKT1; BAD; BCL2L1; BIRC2; CBL; CCL3; CCR7; CDK4; CDKN1A; CFTR; CRH; CYBA; CYBB; FOS; FOSB; FOSL1; FOXO3; FYN; GNAI1; GNB1; GNG2; GSN; HAMP; HSD3B2; ICAM1; LEP; NEFL; NLRP3; OPRM1; PPARA; PRKAA1; PRKAA2; PRKCE; PTK2B; RHOA; SLC2A4; SLC6A3; SMAD2; SPHK2; STAT3; TGFB1; VCAM1	O43306; O43524; O60266; O95622; P01100; P01137; P04839; P05362; P06241; P06396; P06850; P07196; P10147; P11802; P13498; P13569; P14672; P15407; P19320; P22681; P26439; P31749; P32248; P35372; P38936; P40145; P40763; P41159; P51828; P53539; P54646; P59768; P61586; P62873; P63096; P81172; Q01959; Q02156; Q07817; Q07869; Q08462; Q08828; Q13131; Q13490; Q14289; Q15796; Q92934; Q96P20; Q9NRA0
GO_BIOLOGICAL_PROCESS	cellular response to mechanical stimulus	Signaling and pathways	64	21	6.34845e-07	9.63518e-06	AKT1; ATP1A1; ATP1A2; BAD; CD40; CYBA; EGFR; GJA1; IRF1; MAP2K4; MAP3K1; MAP3K14; MAPK3; MAPK8; NFKB1; NPPA; PTGS2; PTPN11; RAC1; SLC2A1; SLC9A1	P00533; P01160; P05023; P10914; P11166; P13498; P17302; P19634; P19838; P25942; P27361; P31749; P35354; P45983; P45985; P50993; P63000; Q06124; Q13233; Q92934; Q99558
GO_BIOLOGICAL_PROCESS	cellular response to prostaglandin E stimulus	Signaling and pathways	13	7	0.00010964	0.000941227	ADCY6; AKT1; GNB1; GNG2; PRKAA1; PRKAA2; PRKCE	O43306; P31749; P54646; P59768; P62873; Q02156; Q13131
GO_BIOLOGICAL_PROCESS	regulation of stress-activated protein kinase signaling cascade	Signaling and pathways	127	29	2.04288e-05	0.00022335	AKT1; CARD9; CCR7; CDC42; EGFR; EZR; FOXM1; FOXO1; HRAS; ITCH; LEP; MAP2K1; MAP2K2; MAP3K11; MAP3K3; MAPK1; MAPK3; MYC; NCF1; NOX1; NPPA; PLCB1; PTK2B; RAPGEF1; RASGRP1; SPHK1; STK3; TRAF2; VEGFA	O95267; P00533; P01106; P01112; P01160; P14598; P15311; P15692; P27361; P28482; P31749; P32248; P36507; P41159; P60953; Q02750; Q08050; Q12778; Q12933; Q13188; Q13905; Q14289; Q16584; Q96J02; Q99759; Q9H257; Q9NQ66; Q9NYA1; Q9Y5S8
GO_BIOLOGICAL_PROCESS	positive regulation of phosphatidylinositol 3-kinase signaling	Signaling and pathways	80	25	1.58441e-07	2.67565e-06	CBL; CCL5; EPO; F2R; FLT1; FYN; GAB1; INSR; IRS2; JAK2; KDR; LEP; NCF1; PIK3CA; PIK3CB; PIK3CD; PIK3CG; PIK3R1; PIK3R5; PTK2; RGL2; SELP; SRC; TNF; UNC5B	O00329; O15211; O60674; P01375; P01588; P06213; P06241; P12931; P13501; P14598; P16109; P17948; P22681; P25116; P27986; P35968; P41159; P42336; P42338; P48736; Q05397; Q13480; Q8IZJ1; Q8WYR1; Q9Y4H2
GO_BIOLOGICAL_PROCESS	transforming growth factor beta receptor signaling pathway	Signaling and pathways	73	19	8.69469e-05	0.000777014	BAMBI; BMPR1A; CBL; CREB1; FOS; JUN; MAP3K7; PARD3; PARD6A; PRKCZ; PTK2; PXN; RHOA; SMAD2; SMAD3; SMAD4; SMAD7; SRC; TGFB1	O15105; O43318; P01100; P01137; P05412; P12931; P16220; P22681; P36894; P49023; P61586; P84022; Q05397; Q05513; Q13145; Q13485; Q15796; Q8TEW0; Q9NPB6
GO_BIOLOGICAL_PROCESS	negative regulation of cellular senescence	Remodelling, survival and endothelial damage	15	8	3.74463e-05	0.000378355	ABL1; AKT3; BCL6; CDK6; MAP3K3; NAMPT; TERT; TWIST1	O14746; P00519; P41182; P43490; Q00534; Q15672; Q99759; Q9Y243
GO_BIOLOGICAL_PROCESS	response to growth hormone	Remodelling, survival and endothelial damage	29	11	7.00626e-05	0.000642537	AKT1; ASS1; JAK2; JAK3; PIK3R1; PTK2; PXN; STAT3; STAT5A; STAT5B; STAT6	O60674; P00966; P27986; P31749; P40763; P42226; P42229; P49023; P51692; P52333; Q05397
GO_BIOLOGICAL_PROCESS	response to starvation	Remodelling, survival and endothelial damage	129	28	7.48202e-05	0.000677905	ATF3; ATF4; BCL2; BMPR2; CBL; CDKN1A; FOXO1; FOXO3; HAMP; JUN; MAPK1; MAPK3; MAPK8; MTOR; PMAIP1; PPARA; PPARGC1A; PRKAA1; PRKAA2; PRKAG1; PRKAG2; PRKAG3; PRKD1; RPTOR; SLC2A1; ULK1; ULK2; UPP1	O43524; O75385; P05412; P10415; P11166; P18847; P18848; P22681; P27361; P28482; P38936; P42345; P45983; P54619; P54646; P81172; Q07869; Q12778; Q13131; Q13794; Q13873; Q15139; Q16831; Q8IYT8; Q8N122; Q9UBK2; Q9UGI9; Q9UGJ0
GO_BIOLOGICAL_PROCESS	regulation of endothelial cell apoptotic process	Remodelling, survival and endothelial damage	42	16	1.47246e-06	2.06088e-05	ABL1; CCL2; CD40; CD40LG; FOXO3; ICAM1; IL10; KDR; PAK4; PDPK1; PLCG1; PRKCI; SERPINE1; TERT; TNF; TNFAIP3	O14746; O15530; O43524; O96013; P00519; P01375; P05121; P05362; P13500; P19174; P21580; P22301; P25942; P29965; P35968; P41743
GO_BIOLOGICAL_PROCESS	negative regulation of neuron apoptotic process	Remodelling, survival and endothelial damage	100	30	2.56935e-08	4.90289e-07	BAX; BCL2; BCL2L1; BDNF; CCL2; CEBPB; F2R; FYN; HIF1A; HMOX1; HRAS; IL10; ILK; JAK2; JUN; KRAS; MAP2K4; NEFL; NRP1; PDPK1; PIK3CA; PPARGC1A; PRKCG; PRKCI; PSEN1; PTK2B; RASA1; RHOA; TERT; UNC5B	O14746; O14786; O15530; O60674; P01112; P01116; P05129; P05412; P06241; P07196; P09601; P10415; P13500; P17676; P20936; P22301; P23560; P25116; P41743; P42336; P45985; P49768; P61586; Q07812; Q07817; Q13418; Q14289; Q16665; Q8IZJ1; Q9UBK2
GO_BIOLOGICAL_PROCESS	establishment or maintenance of cell polarity	Remodelling, survival and endothelial damage	108	28	2.0846e-06	2.8349e-05	ACTB; ARF6; CCR7; CDC42; CRK; CRKL; DOCK2; EZR; GJA1; GSK3B; ILK; MOS; NCKAP1L; NDC80; PAK1; PARD3; PARD6A; PARD6B; PARD6G; PRKCI; PRKCZ; PTK2; RAC1; RAC2; RAC3; RHOA; SLC9A1; SLC9A3R1	O14745; O14777; P00540; P15153; P15311; P17302; P19634; P32248; P41743; P46108; P46109; P49841; P55160; P60709; P60763; P60953; P61586; P62330; P63000; Q05397; Q05513; Q13153; Q13418; Q8TEW0; Q92608; Q9BYG4; Q9BYG5; Q9NPB6
GO_BIOLOGICAL_PROCESS	cellular response to radiation	Remodelling, survival and endothelial damage	108	28	2.0846e-06	2.8349e-05	AKT2; ATF4; BAX; BCL2L1; CASP9; CDKN1A; CLOCK; CREBBP; CYBA; DNM2; EGR1; ELK1; EP300; GNB1; GNGT1; GRB2; HAMP; HRAS; MAPK13; MAPK14; MMP1; MMP2; MMP9; MYC; NAMPT; NOX4; PIK3R1; PTGS2	O15264; O15516; P01106; P01112; P03956; P08253; P13498; P14780; P18146; P18848; P19419; P27986; P31751; P35354; P38936; P43490; P50570; P55211; P62873; P62993; P63211; P81172; Q07812; Q07817; Q09472; Q16539; Q92793; Q9NPH5
GO_BIOLOGICAL_PROCESS	regulation of cell shape	Remodelling, survival and endothelial damage	92	25	2.93423e-06	3.831e-05	BAIAP2; BAMBI; CCL11; CCL2; CCL3; CRK; CYFIP1; EZR; FYN; GNA13; HCK; ICAM1; ITGB2; KDR; PTK2; PTK2B; RAC1; RAC2; RAC3; RASA1; RHOA; RHOQ; SLC9A3R1; VEGFA; WASF3	O14745; P05107; P05362; P06241; P08631; P10147; P13500; P15153; P15311; P15692; P17081; P20936; P35968; P46108; P51671; P60763; P61586; P63000; Q05397; Q13145; Q14289; Q14344; Q7L576; Q9UPY6; Q9UQB8
GO_BIOLOGICAL_PROCESS	positive regulation of cell development	Remodelling, survival and endothelial damage	194	41	3.32824e-06	4.26798e-05	ABL1; BAD; BAIAP2; BCL2; BDNF; BIN1; BMPR2; CDC42; CRK; CRKL; CXCR4; CYFIP1; DCT; DNM2; DOCK1; EEF2K; EPHB2; HIF1A; IL5; ILK; LIMK1; MAP2K1; MTOR; NEFL; NRP1; OPRM1; PAK1; PAK3; PPP1CC; PREX1; PRKCI; RAC1; RAC3; RHOA; SMAD7; TGFB1; TIAM1; TNF; TNFRSF1B; TNFSF11; VEGFA	O00418; O00499; O14786; O14788; O15105; O75914; P00519; P01137; P01375; P05113; P07196; P10415; P15692; P20333; P23560; P29323; P35372; P36873; P40126; P41743; P42345; P46108; P46109; P50570; P53667; P60763; P60953; P61073; P61586; P63000; Q02750; Q13009; Q13153; Q13418; Q13873; Q14185; Q16665; Q7L576; Q8TCU6; Q92934; Q9UQB8
GO_BIOLOGICAL_PROCESS	response to acid chemical	Remodelling, survival and endothelial damage	94	25	4.48858e-06	5.51038e-05	ASS1; ATF2; BAD; BAIAP2; BCL2L1; CASP3; CDKN1B; CEBPB; CHUK; CREB1; CYBA; CYBB; EDN1; EGFR; FYN; ICAM1; MAPK10; MMP2; MTOR; PIK3CA; PPARGC1A; RHOA; RPTOR; TNF; VEGFA	O15111; P00533; P00966; P01375; P04839; P05305; P05362; P06241; P08253; P13498; P15336; P15692; P16220; P17676; P42336; P42345; P42574; P46527; P53779; P61586; Q07817; Q8N122; Q92934; Q9UBK2; Q9UQB8
GO_BIOLOGICAL_PROCESS	regulation of cell morphogenesis	Remodelling, survival and endothelial damage	178	38	5.97381e-06	7.22284e-05	ABL1; BAIAP2; BAMBI; CCL11; CCL2; CCL3; CDC42; CRK; CRKL; CXCR4; CYFIP1; DNM2; DOCK1; EEF2K; EZR; FYN; GNA13; HCK; ICAM1; ILK; ITGB2; KDR; NRP1; PAK3; PREX1; PTK2; PTK2B; RAC1; RAC2; RAC3; RASA1; RHOA; RHOQ; SLC9A3R1; SRC; TIAM1; VEGFA; WASF3	O00418; O14745; O14786; O75914; P00519; P05107; P05362; P06241; P08631; P10147; P12931; P13500; P15153; P15311; P15692; P17081; P20936; P35968; P46108; P46109; P50570; P51671; P60763; P60953; P61073; P61586; P63000; Q05397; Q13009; Q13145; Q13418; Q14185; Q14289; Q14344; Q7L576; Q8TCU6; Q9UPY6; Q9UQB8
GO_BIOLOGICAL_PROCESS	multi-multicellular organism process	Remodelling, survival and endothelial damage	139	32	6.35154e-06	7.62821e-05	AKT1; ARNTL; BCL2; BMPR2; CD38; CRH; CTSB; EDN1; EPO; ESR1; ETS1; FOS; FOSB; FOSL1; GJA1; JUNB; KRAS; LEP; MAPK1; MAPK3; MED1; MMP2; MMP9; MTOR; NAMPT; NPPA; PLA2G6; PTGS2; PTHLH; SLC2A1; SPHK2; STAT5B	O00327; O60733; P01100; P01116; P01160; P01588; P03372; P05305; P06850; P07858; P08253; P10415; P11166; P12272; P14780; P14921; P15407; P17275; P17302; P27361; P28482; P28907; P31749; P35354; P41159; P42345; P43490; P51692; P53539; Q13873; Q15648; Q9NRA0
GO_BIOLOGICAL_PROCESS	regulation of cellular senescence	Remodelling, survival and endothelial damage	28	12	7.39267e-06	8.81971e-05	ABL1; AKT3; ARNTL; BCL6; BMPR1A; CDK6; CDKN2A; KRAS; MAP3K3; NAMPT; TERT; TWIST1	O00327; O14746; P00519; P01116; P36894; P41182; P42771; P43490; Q00534; Q15672; Q99759; Q9Y243
GO_BIOLOGICAL_PROCESS	positive regulation of stress fiber assembly	Remodelling, survival and endothelial damage	33	12	5.33751e-05	0.00051403	ABL1; CDC42; LIMK1; MTOR; NOX4; NRP1; PAK1; PXN; RAC1; RHOA; ROCK2; SMAD3	O14786; O75116; P00519; P42345; P49023; P53667; P60953; P61586; P63000; P84022; Q13153; Q9NPH5
GO_BIOLOGICAL_PROCESS	tissue remodeling	Remodelling, survival and endothelial damage	71	19	5.75602e-05	0.000549189	ACE; BAX; BMPR2; CCR2; CTSK; F2R; GJA1; HIF1A; IL23A; MITF; MMP14; MMP2; NOX4; PTK2B; RAC1; RAC2; SRC; TGFB1; TNFSF11	O14788; O75030; P01137; P08253; P12821; P12931; P15153; P17302; P25116; P41597; P43235; P50281; P63000; Q07812; Q13873; Q14289; Q16665; Q9NPF7; Q9NPH5
GO_BIOLOGICAL_PROCESS	response to tumor necrosis factor	Inflammation	193	41	2.89766e-06	3.79673e-05	AKT1; ASS1; BIRC2; BIRC3; CASP3; CCL11; CCL17; CCL2; CCL3; CCL5; CD40; CD40LG; CHUK; CXCL8; CYBA; EDN1; FOXO3; HAMP; ICAM1; IKBKB; ILK; JAK2; MAP2K7; MAP3K14; MAPK1; MAPK14; MAPK3; NFKB1; NFKBIA; PPARGC1A; PTGS2; PTK2B; SLC2A4; SPHK1; STAT1; TNF; TNFRSF1B; TNFSF11; TRAF2; TRPV1; VCAM1	O14733; O14788; O14920; O15111; O43524; O60674; P00966; P01375; P05305; P05362; P10145; P10147; P13498; P13500; P13501; P14672; P19320; P19838; P20333; P25942; P25963; P27361; P28482; P29965; P31749; P35354; P42224; P42574; P51671; P81172; Q12933; Q13418; Q13489; Q13490; Q14289; Q16539; Q8NER1; Q92583; Q99558; Q9NYA1; Q9UBK2
GO_BIOLOGICAL_PROCESS	cellular extravasation	Permeability	31	12	2.57133e-05	0.000272834	CCL2; CCR2; CRK; CRKL; ICAM1; ITGB2; LEP; PIK3CD; PIK3CG; SELP; TNF; VCAM1	O00329; P01375; P05107; P05362; P13500; P16109; P19320; P41159; P41597; P46108; P46109; P48736
GO_BIOLOGICAL_PROCESS	cellular sodium ion homeostasis	Permeability	14	9	1.40511e-06	1.97429e-05	ATP1A1; ATP1A2; ATP1A3; ATP1A4; ATP1B1; ATP1B2; ATP1B3; SLC8A1; SLC9A1	P05023; P05026; P13637; P14415; P19634; P32418; P50993; P54709; Q13733
GO_BIOLOGICAL_PROCESS	positive regulation of transmembrane transport	Permeability	141	33	3.09307e-06	4.00929e-05	ABCB1; ABL1; AKT1; AKT2; ATP1B1; ATP1B2; ATP1B3; BAX; BRAF; CCL2; CCR2; CFTR; CXCL10; DNM2; EPHB2; F2R; INSR; IRS2; MAPK14; NOS1; NPPA; PDPK1; PIK3R1; PLCG1; PLCG2; PRKCI; PSEN1; PTPN11; RAP1A; RHOQ; SLC9A1; SLC9A3R1; TERT	O14745; O14746; O15530; P00519; P01160; P02778; P05026; P06213; P08183; P13500; P13569; P14415; P15056; P16885; P17081; P19174; P19634; P25116; P27986; P29323; P29475; P31749; P31751; P41597; P41743; P49768; P50570; P54709; P62834; Q06124; Q07812; Q16539; Q9Y4H2
GO_BIOLOGICAL_PROCESS	positive regulation of ion transmembrane transport	Permeability	141	33	3.09307e-06	4.00929e-05	ABCB1; ABL1; AKT1; AKT2; ATP1B1; ATP1B2; ATP1B3; BAX; BRAF; CCL2; CCR2; CFTR; CXCL10; DNM2; EPHB2; F2R; INSR; IRS2; MAPK14; NOS1; NPPA; PDPK1; PIK3R1; PLCG1; PLCG2; PRKCI; PSEN1; PTPN11; RAP1A; RHOQ; SLC9A1; SLC9A3R1; TERT	O14745; O14746; O15530; P00519; P01160; P02778; P05026; P06213; P08183; P13500; P13569; P14415; P15056; P16885; P17081; P19174; P19634; P25116; P27986; P29323; P29475; P31749; P31751; P41597; P41743; P49768; P50570; P54709; P62834; Q06124; Q07812; Q16539; Q9Y4H2
GO_BIOLOGICAL_PROCESS	export across plasma membrane	Permeability	32	13	6.26767e-06	7.54231e-05	ABCB1; ATP1A1; ATP1A2; ATP1A3; ATP1A4; ATP1B1; ATP1B2; ATP1B3; FXYD2; GJA1; RALBP1; SLC8A1; SLC9A1	P05023; P05026; P08183; P13637; P14415; P17302; P19634; P32418; P50993; P54709; P54710; Q13733; Q15311
GO_BIOLOGICAL_PROCESS	cellular potassium ion homeostasis	Permeability	11	7	2.53313e-05	0.000270777	ATP1A1; ATP1A2; ATP1A3; ATP1A4; ATP1B1; ATP1B2; ATP1B3	P05023; P05026; P13637; P14415; P50993; P54709; Q13733
GO_BIOLOGICAL_PROCESS	inorganic cation import across plasma membrane	Permeability	41	14	2.90242e-05	0.000301299	ATP1A1; ATP1A2; ATP1A3; ATP1A4; ATP1B1; ATP1B2; ATP1B3; FXYD2; KCNK9; SLC8A1; SLC9A1; TRPV1; TRPV4; TRPV5	P05023; P05026; P13637; P14415; P19634; P32418; P50993; P54709; P54710; Q13733; Q8NER1; Q9HBA0; Q9NPC2; Q9NQA5
GO_BIOLOGICAL_PROCESS	inorganic ion import across plasma membrane	Permeability	41	14	2.90242e-05	0.000301299	ATP1A1; ATP1A2; ATP1A3; ATP1A4; ATP1B1; ATP1B2; ATP1B3; FXYD2; KCNK9; SLC8A1; SLC9A1; TRPV1; TRPV4; TRPV5	P05023; P05026; P13637; P14415; P19634; P32418; P50993; P54709; P54710; Q13733; Q8NER1; Q9HBA0; Q9NPC2; Q9NQA5
GO_BIOLOGICAL_PROCESS	regulation of fatty acid transport	Permeability	41	14	2.90242e-05	0.000301299	AKT1; AKT2; ATP1A2; CCK; EDN1; IRS2; MAP2K6; PLA2G4A; PLA2G6; PPARA; PSEN1; PTGES; SYK; TNFSF11	O14684; O14788; O60733; P05305; P06307; P31749; P31751; P43405; P47712; P49768; P50993; P52564; Q07869; Q9Y4H2
GO_BIOLOGICAL_PROCESS	import across plasma membrane	Permeability	57	17	3.10714e-05	0.000319783	ATP1A1; ATP1A2; ATP1A3; ATP1A4; ATP1B1; ATP1B2; ATP1B3; FXYD2; KCNK9; SLC2A1; SLC2A5; SLC8A1; SLC9A1; SLC9A3R1; TRPV1; TRPV4; TRPV5	O14745; P05023; P05026; P11166; P13637; P14415; P19634; P22732; P32418; P50993; P54709; P54710; Q13733; Q8NER1; Q9HBA0; Q9NPC2; Q9NQA5
GO_BIOLOGICAL_PROCESS	regulation of organic acid transport	Permeability	50	15	8.42266e-05	0.000756462	AKT1; AKT2; ATP1A2; CCK; EDN1; IRS2; LEP; MAP2K6; PLA2G4A; PLA2G6; PPARA; PSEN1; PTGES; SYK; TNFSF11	O14684; O14788; O60733; P05305; P06307; P31749; P31751; P41159; P43405; P47712; P49768; P50993; P52564; Q07869; Q9Y4H2
GO_BIOLOGICAL_PROCESS	cellular monovalent inorganic cation homeostasis	Permeability	45	14	9.34074e-05	0.000826535	ATP1A1; ATP1A2; ATP1A3; ATP1A4; ATP1B1; ATP1B2; ATP1B3; BCL2; CFTR; MAPK1; MAPK3; NOX1; SLC8A1; SLC9A1	P05023; P05026; P10415; P13569; P13637; P14415; P19634; P27361; P28482; P32418; P50993; P54709; Q13733; Q9Y5S8
GO_BIOLOGICAL_PROCESS	regulation of translation	Permeability	138	29	0.000103441	0.000905764	AKT1; AKT2; ATF4; BCL3; CCL5; CDK4; CYFIP1; EIF4E; FOXO3; HSPB1; KRT17; MAPK1; MAPK3; MKNK1; MKNK2; MTOR; NCK2; PLD1; PPP1CA; PTK2B; RHOA; ROCK2; RPS6KA1; RPS6KA3; RPS6KB1; RPS6KB2; STAT3; TNF; TSC1	O43524; O43639; O75116; P01375; P04792; P06730; P11802; P13501; P18848; P20749; P23443; P27361; P28482; P31749; P31751; P40763; P42345; P51812; P61586; P62136; Q04695; Q13393; Q14289; Q15418; Q7L576; Q92574; Q9BUB5; Q9HBH9; Q9UBS0
GO_BIOLOGICAL_PROCESS	calcium-mediated signaling	Permeability	107	26	1.71827e-05	0.000190173	ATP1A2; ATP1B1; BTK; CCL3; CCR2; CCR7; CXCL8; CXCR4; EDN1; EGFR; GRIN2C; KDR; NFATC1; NFATC2; NFATC3; PDPK1; PLCE1; PLCG1; PLCG2; PRKAA1; SELP; SLC8A1; SLC9A1; SPHK1; TNFSF11; VCAM1	O14788; O15530; O95644; P00533; P05026; P05305; P10145; P10147; P16109; P16885; P19174; P19320; P19634; P32248; P32418; P35968; P41597; P50993; P61073; Q06187; Q12968; Q13131; Q13469; Q14957; Q9NYA1; Q9P212
GO_BIOLOGICAL_PROCESS	regulation of calcium ion transport	Permeability	159	37	8.96803e-07	1.30086e-05	ABL1; ATP1A2; ATP1B1; BAX; BCL2; BIN1; CCL2; CCL3; CCL5; CRH; CXCL10; CXCR4; CYBA; EPO; F2R; FYN; GJA1; GNAI2; GNAO1; GNB5; ICAM1; MYLK; NOS1; NPPA; PDPK1; PIK3CG; PLA2G1B; PLA2G6; PLCG1; PLCG2; PRKCE; PTGS2; PTK2B; RHOA; SLC8A1; SLC9A1; SPHK2	O00499; O14775; O15530; O60733; P00519; P01160; P01588; P02778; P04054; P04899; P05026; P05362; P06241; P06850; P09471; P10147; P10415; P13498; P13500; P13501; P16885; P17302; P19174; P19634; P25116; P29475; P32418; P35354; P48736; P50993; P61073; P61586; Q02156; Q07812; Q14289; Q15746; Q9NRA0
GO_BIOLOGICAL_PROCESS	positive regulation of protein transport	Permeability	199	42	2.61173e-06	3.46019e-05	ADCY8; AKT2; ARF6; BAD; BCL2; BID; CD38; CDC42; CFTR; CRH; EGFR; EZR; FYN; GJA1; GSK3A; GSK3B; HIF1A; HRAS; IRS2; ITGB2; JAK2; LEP; MAPK1; MAPK14; MAPK8; PAK1; PIK3R1; PIK3R2; PLA2G1B; PLA2G6; PMAIP1; PRKAA1; PRKCD; PRKCE; PRKCZ; PSEN1; PTGS2; RAC1; RAC2; SMAD3; TGFB1; TNF	O00459; O60674; O60733; P00533; P01112; P01137; P01375; P04054; P05107; P06241; P06850; P10415; P13569; P15153; P15311; P17302; P27986; P28482; P28907; P31751; P35354; P40145; P41159; P45983; P49768; P49840; P49841; P55957; P60953; P62330; P63000; P84022; Q02156; Q05513; Q05655; Q13131; Q13153; Q13794; Q16539; Q16665; Q92934; Q9Y4H2
GO_BIOLOGICAL_PROCESS	regulation of lipid transport	Permeability	98	24	3.15021e-05	0.000321935	AKT1; AKT2; APOA5; APOC3; ATP1A2; CCK; CRH; EDN1; IRS2; ITGAV; ITGB3; LEP; MAP2K6; NFKB1; NFKBIA; PLA2G4A; PLA2G6; PPARA; PRKCD; PSEN1; PTGES; PTPN11; SYK; TNFSF11	O14684; O14788; O60733; P02656; P05106; P05305; P06307; P06756; P06850; P19838; P25963; P31749; P31751; P41159; P43405; P47712; P49768; P50993; P52564; Q05655; Q06124; Q07869; Q6Q788; Q9Y4H2
GO_BIOLOGICAL_PROCESS	positive regulation of anion transmembrane transport	Permeability	47	15	3.76083e-05	0.000378927	ABCB1; AKT1; AKT2; BRAF; CFTR; INSR; IRS2; MAPK14; PIK3R1; PRKCI; PSEN1; PTPN11; RAP1A; RHOQ; TERT	O14746; P06213; P08183; P13569; P15056; P17081; P27986; P31749; P31751; P41743; P49768; P62834; Q06124; Q16539; Q9Y4H2
GO_BIOLOGICAL_PROCESS	positive regulation of intracellular protein transport	Permeability	117	26	8.90385e-05	0.000791771	AKT2; BAD; BCL2; BID; CDC42; FYN; GSK3A; GSK3B; HRAS; ITGB2; JAK2; LEP; MAPK1; MAPK14; MAPK8; PAK1; PIK3R1; PIK3R2; PMAIP1; PRKAA1; PRKCD; PSEN1; PTGS2; RAC2; SMAD3; TGFB1	O00459; O60674; P01112; P01137; P05107; P06241; P10415; P15153; P27986; P28482; P31751; P35354; P41159; P45983; P49768; P49840; P49841; P55957; P60953; P84022; Q05655; Q13131; Q13153; Q13794; Q16539; Q92934
GO_BIOLOGICAL_PROCESS	sodium ion export across plasma membrane	Permeability	13	10	2.43084e-08	4.68833e-07	ATP1A1; ATP1A2; ATP1A3; ATP1A4; ATP1B1; ATP1B2; ATP1B3; FXYD2; SLC8A1; SLC9A1	P05023; P05026; P13637; P14415; P19634; P32418; P50993; P54709; P54710; Q13733
GO_BIOLOGICAL_PROCESS	regulation of protein secretion	Permeability	168	34	5.96945e-05	0.000562834	ADCY5; ADCY8; ARF6; ARNTL; BAD; CCL5; CD38; CFTR; CLOCK; CRH; EGFR; EZR; F2R; FOXA2; GJA1; HIF1A; IL12B; IRS2; JAK2; LEP; NOS2; OPRM1; PLA2G1B; PLA2G6; PRKCA; PRKCE; PTPN11; RAC1; RAP1A; SLC2A1; SLC2A2; TGFB1; TIAM1; TNF	O00327; O15516; O60674; O60733; O95622; P00533; P01137; P01375; P04054; P06850; P11166; P11168; P13501; P13569; P15311; P17252; P17302; P25116; P28907; P29460; P35228; P35372; P40145; P41159; P62330; P62834; P63000; Q02156; Q06124; Q13009; Q16665; Q92934; Q9Y261; Q9Y4H2
GO_BIOLOGICAL_PROCESS	import into cell	Permeability	84	21	7.09119e-05	0.000646565	ATP1A1; ATP1A2; ATP1A3; ATP1A4; ATP1B1; ATP1B2; ATP1B3; DNM1; DNM2; DNM3; FXYD2; KCNK9; RPS6KB1; SLC2A1; SLC2A5; SLC6A3; SLC8A1; SLC9A1; TRPV1; TRPV4; TRPV5	P05023; P05026; P11166; P13637; P14415; P19634; P22732; P23443; P32418; P50570; P50993; P54709; P54710; Q01959; Q05193; Q13733; Q8NER1; Q9HBA0; Q9NPC2; Q9NQA5; Q9UQ16
GO_BIOLOGICAL_PROCESS	regulation of peptide secretion	Permeability	185	36	8.61073e-05	0.000771427	ADCY5; ADCY8; ARF6; ARNTL; BAD; CCL5; CD38; CFTR; CLOCK; CRH; EGFR; EZR; F2R; FOXA2; GJA1; HIF1A; IL12B; IRS2; JAK2; LEP; NOS2; OPRM1; PAX8; PLA2G1B; PLA2G6; PRKCA; PRKCE; PTPN11; RAC1; RAP1A; SLC2A1; SLC2A2; TGFB1; TIAM1; TNF; TNFSF11	O00327; O14788; O15516; O60674; O60733; O95622; P00533; P01137; P01375; P04054; P06850; P11166; P11168; P13501; P13569; P15311; P17252; P17302; P25116; P28907; P29460; P35228; P35372; P40145; P41159; P62330; P62834; P63000; Q02156; Q06124; Q06710; Q13009; Q16665; Q92934; Q9Y261; Q9Y4H2
GO_BIOLOGICAL_PROCESS	regulation of endocytosis	Permeability	118	26	0.000103494	0.000905764	ABL1; ABL2; APOA5; APOC3; ARF6; BIN1; CBL; CDC42; DNM1; DNM2; EEF2K; INSR; ITGB3; NCKAP1L; PIK3CB; PLCG2; PRKD1; PSEN1; RAC1; SERPINE1; SPHK1; SRC; SYK; TSC2; VEGFA; WASL	O00401; O00418; O00499; P00519; P02656; P05106; P05121; P06213; P12931; P15692; P16885; P22681; P42338; P42684; P43405; P49768; P49815; P50570; P55160; P60953; P62330; P63000; Q05193; Q15139; Q6Q788; Q9NYA1
GO_BIOLOGICAL_PROCESS	hepatocyte apoptotic process	Unclassified	11	7	2.53313e-05	0.000270777	ARF6; BCL2L1; BID; GSN; PIK3CG; RB1; STK3	P06396; P06400; P48736; P55957; P62330; Q07817; Q13188
GO_BIOLOGICAL_PROCESS	organophosphate biosynthetic process	Unclassified	178	40	8.47624e-07	1.24034e-05	ADCY1; ADCY2; ADCY3; ADCY4; ADCY5; ADCY6; ADCY7; ADCY8; ADCY9; CHKA; CHKB; MAPK1; NAMPT; NPPA; PIK3CA; PIK3CB; PIK3CD; PIK3CG; PIK3R1; PIK3R2; PIK3R3; PIK3R5; PIK3R6; PIP5K1A; PIP5K1B; PIP5K1C; PLA2G1B; PLA2G2A; PLA2G4A; PLA2G6; PLAAT3; PLCG2; PLD1; PLD2; PRKAG2; PTGS2; PTPN13; SPHK2; TGFB1; UPP1	O00329; O00459; O14939; O14986; O43306; O60266; O60331; O60503; O60733; O95622; P01137; P01160; P04054; P14555; P16885; P27986; P28482; P35354; P35790; P40145; P42336; P42338; P43490; P47712; P48736; P51828; P53816; Q08462; Q08828; Q12923; Q13393; Q16831; Q5UE93; Q8NFM4; Q8WYR1; Q92569; Q99755; Q9NRA0; Q9UGJ0; Q9Y259
GO_BIOLOGICAL_PROCESS	response to forskolin	Unclassified	11	8	1.39426e-06	1.96673e-05	ADCY1; ADCY2; ADCY3; ADCY5; ADCY6; ADCY8; CFTR; GNAI1	O43306; O60266; O95622; P13569; P40145; P63096; Q08462; Q08828
GO_BIOLOGICAL_PROCESS	cellular response to forskolin	Unclassified	11	8	1.39426e-06	1.96673e-05	ADCY1; ADCY2; ADCY3; ADCY5; ADCY6; ADCY8; CFTR; GNAI1	O43306; O60266; O95622; P13569; P40145; P63096; Q08462; Q08828
GO_BIOLOGICAL_PROCESS	response to mineralocorticoid	Unclassified	29	13	1.63596e-06	2.27203e-05	CDKN1A; CRH; CYBA; CYBB; EDN1; FOS; FOSB; FOSL1; FOXO3; HSD3B2; KRAS; NEFL; SRC	O43524; P01100; P01116; P04839; P05305; P06850; P07196; P12931; P13498; P15407; P26439; P38936; P53539
GO_BIOLOGICAL_PROCESS	peptidyl-serine dephosphorylation	Unclassified	12	8	3.80972e-06	4.83371e-05	PPP1CA; PPP2CA; PPP2CB; PPP2R1A; PPP2R2A; PPP2R2B; PPP2R2C; PPP2R2D	P30153; P62136; P62714; P63151; P67775; Q00005; Q66LE6; Q9Y2T4
GO_BIOLOGICAL_PROCESS	peptidyl-threonine phosphorylation	Unclassified	52	17	7.95081e-06	9.43864e-05	AKT1; BCL2; GSK3A; GSK3B; MAP2K1; MAPK1; MAPK8; MTOR; MYLK2; PDPK1; PRKCA; PRKCB; PRKCD; PRKD1; PRKD2; ROCK2; ULK1	O15530; O75116; O75385; P05771; P10415; P17252; P28482; P31749; P42345; P45983; P49840; P49841; Q02750; Q05655; Q15139; Q9BZL6; Q9H1R3
GO_BIOLOGICAL_PROCESS	phosphatidylinositol biosynthetic process	Unclassified	38	14	1.06448e-05	0.000122526	PIK3CA; PIK3CB; PIK3CD; PIK3CG; PIK3R1; PIK3R2; PIK3R3; PIK3R5; PIK3R6; PIP5K1A; PIP5K1B; PIP5K1C; PLCG2; PTPN13	O00329; O00459; O14986; O60331; P16885; P27986; P42336; P42338; P48736; Q12923; Q5UE93; Q8WYR1; Q92569; Q99755
GO_BIOLOGICAL_PROCESS	peptidyl-threonine modification	Unclassified	54	17	1.40554e-05	0.000158736	AKT1; BCL2; GSK3A; GSK3B; MAP2K1; MAPK1; MAPK8; MTOR; MYLK2; PDPK1; PRKCA; PRKCB; PRKCD; PRKD1; PRKD2; ROCK2; ULK1	O15530; O75116; O75385; P05771; P10415; P17252; P28482; P31749; P42345; P45983; P49840; P49841; Q02750; Q05655; Q15139; Q9BZL6; Q9H1R3
GO_BIOLOGICAL_PROCESS	cellular response to nerve growth factor stimulus	Unclassified	39	14	1.50744e-05	0.000169181	AKT1; ARF6; ARPC3; BDNF; CBL; CREB1; CRK; EEF2K; FOXO3; PDPK1; RAP1A; RAPGEF1; TRPV1; WASF1	O00418; O15145; O15530; O43524; P16220; P22681; P23560; P31749; P46108; P62330; P62834; Q13905; Q8NER1; Q92558
GO_BIOLOGICAL_PROCESS	response to organophosphorus	Unclassified	92	23	3.22929e-05	0.000329059	ASS1; BIRC2; CARM1; CFTR; EEF2K; EZR; FOS; FOSB; FOSL1; JUN; LDHA; NOX4; PIK3CG; PTGS2; PTK2B; RAP1A; RAP1B; RAPGEF1; SLC6A3; SLC8A1; STAT1; TRPV1; TYR	O00418; P00338; P00966; P01100; P05412; P13569; P14679; P15311; P15407; P32418; P35354; P42224; P48736; P53539; P61224; P62834; Q01959; Q13490; Q13905; Q14289; Q86X55; Q8NER1; Q9NPH5
GO_BIOLOGICAL_PROCESS	ovarian follicle development	Unclassified	37	13	3.97001e-05	0.000397775	AMH; BAX; BCL2; BCL2L1; BMPR1B; CEBPB; ESR1; FOXO3; ICAM1; MMP14; SMAD4; SRC; VEGFA	O00238; O43524; P03372; P03971; P05362; P10415; P12931; P15692; P17676; P50281; Q07812; Q07817; Q13485
GO_BIOLOGICAL_PROCESS	homeostasis of number of cells within a tissue	Unclassified	20	9	6.7011e-05	0.000621233	AKT3; BAX; BCL2; CCR2; CSF1; F2R; KRAS; PTPN11; RAC3	P01116; P09603; P10415; P25116; P41597; P60763; Q06124; Q07812; Q9Y243
GO_BIOLOGICAL_PROCESS	response to nicotine	Unclassified	39	13	7.46762e-05	0.000677453	ATP1A2; BAD; BCL2; CASP3; CREB1; EDN1; HMOX1; MAPK1; NFKB1; PPARA; SLC6A3; TNF; VCAM1	P01375; P05305; P09601; P10415; P16220; P19320; P19838; P28482; P42574; P50993; Q01959; Q07869; Q92934
GO_BIOLOGICAL_PROCESS	positive regulation of erythrocyte differentiation	General immune-related processes	25	10	8.88272e-05	0.00079087	ETS1; FOXO3; HIF1A; MAPK11; MAPK14; MED1; NCKAP1L; STAT1; STAT3; STAT5B	O43524; P14921; P40763; P42224; P51692; P55160; Q15648; Q15759; Q16539; Q16665
GO_BIOLOGICAL_PROCESS	positive regulation of peptidyl-lysine acetylation	Unclassified	25	10	8.88272e-05	0.00079087	FOXP3; MAPK3; MUC1; NOS1; PPARGC1A; PRKAA1; PRKAA2; RPS6KA5; SMAD4; SPHK2	O75582; P15941; P27361; P29475; P54646; Q13131; Q13485; Q9BZS1; Q9NRA0; Q9UBK2
GO_BIOLOGICAL_PROCESS	positive regulation of phospholipase activity	Signaling and pathways	51	15	0.000108317	0.00093545	ABL2; BDNF; CCL5; EGFR; ESR1; FLT1; GNA13; HRAS; ITK; PDPK1; PLA2G1B; PLCB2; PLCG1; PRKCZ; TXK	O15530; P00533; P01112; P03372; P04054; P13501; P17948; P19174; P23560; P42681; P42684; Q00722; Q05513; Q08881; Q14344
GO_BIOLOGICAL_PROCESS	dopamine receptor signaling pathway	Signaling and pathways	25	11	1.3218e-05	0.000150459	ADCY5; ADCY6; GNAI3; GNAO1; GNB1; GNB5; GNG2; GSK3A; GSK3B; OPRM1; SLC9A3R1	O14745; O14775; O43306; O95622; P08754; P09471; P35372; P49840; P49841; P59768; P62873
GO_BIOLOGICAL_PROCESS	negative regulation of cell aging	Unclassified	20	9	6.7011e-05	0.000621233	ABL1; AKT3; BCL6; CDK6; FOXM1; MAP3K3; NAMPT; TERT; TWIST1	O14746; P00519; P41182; P43490; Q00534; Q08050; Q15672; Q99759; Q9Y243
GO_BIOLOGICAL_PROCESS	regulation of cellular component size	Unclassified	199	63	0	0	ABI2; ABL1; AKT1; AKT3; ARF6; ARPC1B; ARPC3; BAIAP2; BDNF; BIN1; BMPR2; BRK1; CCL11; CCR7; CDK4; CREB1; CYFIP1; CYFIP2; DCC; DNM2; EDN1; EZR; GNB3; GRB2; GSK3B; GSN; HCK; ICAM1; ILK; IQGAP2; IQGAP3; LIMK1; MTOR; NCK2; NCKAP1; NCKAP1L; NEFL; NRP1; PAK1; PAK3; PIK3CA; PPP1CA; PREX1; PRKCD; PRKCE; PTK2B; RAC1; RASA1; RHOA; RPTOR; SLC9A3R1; TRPV4; TSC1; ULK2; VAV1; VAV2; VAV3; VEGFA; WAS; WASF1; WASF…	O00401; O00499; O14745; O14786; O15143; O15145; O43639; O75914; P00519; P05305; P05362; P06396; P07196; P08631; P11802; P15311; P15498; P15692; P16220; P16520; P20936; P23560; P31749; P32248; P42336; P42345; P42768; P43146; P49841; P50570; P51671; P52735; P53667; P55160; P61586; P62136; P62330; P62993; P63000; Q02156; Q05655; Q13153; Q13418; Q13576; Q13873; Q14289; Q7L576; Q86VI3; Q8IYT8; Q8N122;…
GO_BIOLOGICAL_PROCESS	cellular response to peptide hormone stimulus	Signaling and pathways	193	62	0	0	ADCY1; ADCY2; ADCY3; ADCY4; ADCY5; ADCY6; ADCY7; ADCY8; ADCY9; AKT1; AKT2; ASS1; BAIAP2; BCAR1; CDK4; CREB1; CRK; CYBA; CYFIP1; EDN1; EEF2K; FOXO1; FOXO4; FYN; G6PC; GAB1; GRB2; GSK3A; GSK3B; INSR; IRS2; IRS4; JAK2; JAK3; LEP; NAMPT; NFKB1; PAK1; PDPK1; PIK3CA; PIK3R1; PIK3R2; PIK3R3; PLA2G1B; PRKCD; PRKCI; PRKCZ; PTK2; PXN; RAP1B; RHOQ; RPS6KB1; SHC1; SLC2A4; SLC9A1; SOS1; SRC; STAT3; STAT5A; ST…	O00418; O00459; O14654; O15530; O43306; O60266; O60343; O60503; O60674; O95622; P00966; P04054; P05305; P06213; P06241; P11802; P12931; P13498; P14672; P16220; P17081; P19634; P19838; P23443; P27986; P29353; P31749; P31751; P35575; P40145; P40763; P41159; P41743; P42226; P42229; P42336; P43490; P46108; P49023; P49840; P49841; P51692; P51828; P52333; P56945; P61224; P62993; P98177; Q05397; Q05513;…
GO_BIOLOGICAL_PROCESS	peptidyl-serine phosphorylation	Unclassified	125	47	1.11022e-16	5.91626e-15	AKT1; AKT2; AKT3; BCL2; CHUK; EPO; GSK3A; GSK3B; IKBKB; ILK; MAP2K2; MAPK1; MAPK12; MAPK13; MAPK14; MAPK3; MAPK8; MAPK9; MAPKAPK2; MAPKAPK3; MKNK1; MKNK2; MTOR; PAK2; PDPK1; PRKAA1; PRKAA2; PRKCA; PRKCB; PRKCD; PRKCE; PRKCG; PRKCI; PRKCZ; PRKD1; PRKD2; ROCK2; RPS6KA1; RPS6KA2; RPS6KA3; RPS6KA5; RPS6KA6; RPS6KB1; RPS6KB2; SRC; SYK; ULK1	O14920; O15111; O15264; O15530; O75116; O75385; O75582; P01588; P05129; P05771; P10415; P12931; P17252; P23443; P27361; P28482; P31749; P31751; P36507; P41743; P42345; P43405; P45983; P45984; P49137; P49840; P49841; P51812; P53778; P54646; Q02156; Q05513; Q05655; Q13131; Q13177; Q13418; Q15139; Q15349; Q15418; Q16539; Q16644; Q9BUB5; Q9BZL6; Q9HBH9; Q9UBS0; Q9UK32; Q9Y243
GO_BIOLOGICAL_PROCESS	peptidyl-serine modification	Unclassified	131	47	1.11022e-15	5.28937e-14	AKT1; AKT2; AKT3; BCL2; CHUK; EPO; GSK3A; GSK3B; IKBKB; ILK; MAP2K2; MAPK1; MAPK12; MAPK13; MAPK14; MAPK3; MAPK8; MAPK9; MAPKAPK2; MAPKAPK3; MKNK1; MKNK2; MTOR; PAK2; PDPK1; PRKAA1; PRKAA2; PRKCA; PRKCB; PRKCD; PRKCE; PRKCG; PRKCI; PRKCZ; PRKD1; PRKD2; ROCK2; RPS6KA1; RPS6KA2; RPS6KA3; RPS6KA5; RPS6KA6; RPS6KB1; RPS6KB2; SRC; SYK; ULK1	O14920; O15111; O15264; O15530; O75116; O75385; O75582; P01588; P05129; P05771; P10415; P12931; P17252; P23443; P27361; P28482; P31749; P31751; P36507; P41743; P42345; P43405; P45983; P45984; P49137; P49840; P49841; P51812; P53778; P54646; Q02156; Q05513; Q05655; Q13131; Q13177; Q13418; Q15139; Q15349; Q15418; Q16539; Q16644; Q9BUB5; Q9BZL6; Q9HBH9; Q9UBS0; Q9UK32; Q9Y243
GO_BIOLOGICAL_PROCESS	positive regulation of protein complex assembly	Unclassified	160	47	5.56022e-12	1.80181e-10	ABI2; ARF6; ARPC1B; ARPC3; BAIAP2; BAX; BCL2L11; BID; BIN1; BRK1; CCK; CCL11; CCR7; CDKN1B; CREB1; CSF2; CYFIP1; ESR1; GRB2; GSK3B; GSN; HCK; ICAM1; IL5; IQGAP2; MAPK9; MMP1; MTOR; NCK2; NCKAP1; NCKAP1L; PAK1; PRKCE; PTK2B; RAC1; RAP1B; RHOA; SRC; SYK; TGFB1; TNF; VEGFA; WAS; WASF1; WASF2; WASF3; WASL	O00401; O00499; O15143; O15145; O43521; O43639; P01137; P01375; P03372; P03956; P04141; P05113; P05362; P06307; P06396; P08631; P12931; P15692; P16220; P32248; P42345; P42768; P43405; P45984; P46527; P49841; P51671; P55160; P55957; P61224; P61586; P62330; P62993; P63000; Q02156; Q07812; Q13153; Q13576; Q14289; Q7L576; Q8WUW1; Q92558; Q9NYB9; Q9UPY6; Q9UQB8; Q9Y2A7; Q9Y6W5
GO_BIOLOGICAL_PROCESS	positive regulation of protein polymerization	Unclassified	75	30	8.09308e-12	2.56483e-10	ABI2; ARF6; ARPC1B; ARPC3; BAIAP2; BIN1; BRK1; CCL11; CCR7; CDKN1B; CYFIP1; GRB2; GSN; HCK; ICAM1; IQGAP2; MTOR; NCK2; NCKAP1; NCKAP1L; PAK1; PRKCE; PTK2B; RAC1; RHOA; WAS; WASF1; WASF2; WASF3; WASL	O00401; O00499; O15143; O15145; O43639; P05362; P06396; P08631; P32248; P42345; P42768; P46527; P51671; P55160; P61586; P62330; P62993; P63000; Q02156; Q13153; Q13576; Q14289; Q7L576; Q8WUW1; Q92558; Q9NYB9; Q9UPY6; Q9UQB8; Q9Y2A7; Q9Y6W5
GO_BIOLOGICAL_PROCESS	response to mechanical stimulus	Signaling and pathways	146	43	4.24837e-11	1.22251e-09	AKT1; ATP1A1; ATP1A2; BAD; CD40; CXCL10; CXCR4; CYBA; EDN1; EGFR; ETS1; FOS; FOSB; FOSL1; FYN; GATA4; GJA1; GSN; IRF1; JUN; JUND; MAP2K4; MAP3K1; MAP3K14; MAPK14; MAPK3; MAPK8; MMP14; NFKB1; NPPA; PIK3CA; PTGS2; PTK2; PTK2B; PTPN11; RAC1; RAF1; RHOA; SLC2A1; SLC8A1; SLC9A1; SRC; TRPV4	P00533; P01100; P01160; P02778; P04049; P05023; P05305; P05412; P06241; P06396; P10914; P11166; P12931; P13498; P14921; P15407; P17302; P17535; P19634; P19838; P25942; P27361; P31749; P32418; P35354; P42336; P43694; P45983; P45985; P50281; P50993; P53539; P61073; P61586; P63000; Q05397; Q06124; Q13233; Q14289; Q16539; Q92934; Q99558; Q9HBA0
GO_BIOLOGICAL_PROCESS	cellular response to ketone	Unclassified	75	28	2.81683e-10	7.23724e-09	ADCY1; ADCY2; ADCY3; ADCY5; ADCY6; ADCY8; AKT1; ASS1; CASP9; CDK4; CFTR; CRH; DDIT4; EGFR; EIF4E; ELK1; FOXO1; FOXO3; GNAI1; GNB1; GNG2; ICAM1; PRKAA1; PRKAA2; PRKCE; ROCK2; SPHK2; SRC	O43306; O43524; O60266; O75116; O95622; P00533; P00966; P05362; P06730; P06850; P11802; P12931; P13569; P19419; P31749; P40145; P54646; P55211; P59768; P62873; P63096; Q02156; Q08462; Q08828; Q12778; Q13131; Q9NRA0; Q9NX09
GO_BIOLOGICAL_PROCESS	regulation of protein polymerization	Unclassified	121	36	1.27921e-09	2.96859e-08	ABI2; ABL1; ARF6; ARPC1B; ARPC3; BAIAP2; BIN1; BRK1; CCL11; CCR7; CDKN1B; CYFIP1; CYFIP2; GRB2; GSN; HCK; ICAM1; IQGAP2; MTOR; NCK2; NCKAP1; NCKAP1L; PAK1; PAK3; PREX1; PRKCD; PRKCE; PTK2B; RAC1; RASA1; RHOA; WAS; WASF1; WASF2; WASF3; WASL	O00401; O00499; O15143; O15145; O43639; O75914; P00519; P05362; P06396; P08631; P20936; P32248; P42345; P42768; P46527; P51671; P55160; P61586; P62330; P62993; P63000; Q02156; Q05655; Q13153; Q13576; Q14289; Q7L576; Q8TCU6; Q8WUW1; Q92558; Q96F07; Q9NYB9; Q9UPY6; Q9UQB8; Q9Y2A7; Q9Y6W5
GO_BIOLOGICAL_PROCESS	peptidyl-tyrosine phosphorylation	Unclassified	116	33	2.19848e-08	4.28614e-07	ABI2; ABL1; ABL2; BTK; EGFR; EPHB2; EPHB4; EPHB6; FLT1; FYN; HCK; IL21; INSR; ITK; JAK1; JAK2; JAK3; KDR; LEP; MAP2K1; MAP2K2; MAP2K3; MAP2K4; MAP2K6; MAP2K7; MAPK3; PRKCD; PTK2; PTK2B; SRC; SYK; TXK; ZAP70	O14733; O15197; O60674; P00519; P00533; P06213; P06241; P08631; P12931; P17948; P23458; P27361; P29323; P35968; P36507; P41159; P42681; P42684; P43403; P43405; P45985; P46734; P52333; P52564; P54760; Q02750; Q05397; Q05655; Q06187; Q08881; Q14289; Q9HBE4; Q9NYB9
GO_BIOLOGICAL_PROCESS	peptidyl-tyrosine modification	Unclassified	116	33	2.19848e-08	4.28614e-07	ABI2; ABL1; ABL2; BTK; EGFR; EPHB2; EPHB4; EPHB6; FLT1; FYN; HCK; IL21; INSR; ITK; JAK1; JAK2; JAK3; KDR; LEP; MAP2K1; MAP2K2; MAP2K3; MAP2K4; MAP2K6; MAP2K7; MAPK3; PRKCD; PTK2; PTK2B; SRC; SYK; TXK; ZAP70	O14733; O15197; O60674; P00519; P00533; P06213; P06241; P08631; P12931; P17948; P23458; P27361; P29323; P35968; P36507; P41159; P42681; P42684; P43403; P43405; P45985; P46734; P52333; P52564; P54760; Q02750; Q05397; Q05655; Q06187; Q08881; Q14289; Q9HBE4; Q9NYB9
GO_BIOLOGICAL_PROCESS	Fc receptor mediated stimulatory signaling pathway	General immune-related processes	66	43	0	0	ABL1; ACTB; ACTG1; ARPC1B; ARPC3; BAIAP2; BRK1; CDC42; CRK; CYFIP1; CYFIP2; DOCK1; FCGR1A; FCGR2A; FYN; GRB2; HCK; LIMK1; MAPK1; MAPK3; NCKAP1; NCKAP1L; PAK1; PIK3CA; PIK3CB; PIK3R1; PIK3R2; PLA2G6; PLCG1; PLCG2; PLD2; PRKCD; PRKCE; PTK2; RAC1; SRC; SYK; VAV1; VAV2; VAV3; WAS; WASF2; WASL	O00401; O00459; O14939; O15143; O15145; O60733; P00519; P06241; P08631; P12314; P12318; P12931; P15498; P16885; P19174; P27361; P27986; P28482; P42336; P42338; P42768; P43405; P46108; P52735; P53667; P55160; P60709; P60953; P62993; P63000; P63261; Q02156; Q05397; Q05655; Q13153; Q14185; Q7L576; Q8WUW1; Q96F07; Q9UKW4; Q9UQB8; Q9Y2A7; Q9Y6W5
GO_BIOLOGICAL_PROCESS	cognition	Unclassified	172	38	2.50057e-06	3.33749e-05	ADCY1; ADCY3; ADCY8; ATP1A2; BDNF; CASP3; CCK; CCL11; CEBPB; CREB1; CRH; CYFIP1; EGFR; EP300; EPHB2; FOS; FOSL1; FYN; GRPR; HIF1A; INSR; JUN; KRAS; MAPK1; MTOR; PAK5; PAK6; PLA2G6; PLCB1; PRKCG; PRKCZ; PSEN1; PTGS2; RIN1; SHC3; SLC2A4; THRA; TNF	O60266; O60733; P00533; P01100; P01116; P01375; P05129; P05412; P06213; P06241; P06307; P06850; P10827; P14672; P15407; P16220; P17676; P23560; P28482; P29323; P30550; P35354; P40145; P42345; P42574; P49768; P50993; P51671; Q05513; Q08828; Q09472; Q13671; Q16665; Q7L576; Q92529; Q9NQ66; Q9NQU5; Q9P286
GO_BIOLOGICAL_PROCESS	learning or memory	Unclassified	159	36	2.52505e-06	3.36234e-05	ADCY1; ADCY3; ADCY8; ATP1A2; BDNF; CASP3; CCK; CCL11; CEBPB; CREB1; CRH; EGFR; EP300; EPHB2; FOS; FOSL1; FYN; GRPR; HIF1A; INSR; JUN; KRAS; MAPK1; MTOR; PAK5; PAK6; PLA2G6; PLCB1; PRKCG; PRKCZ; PSEN1; PTGS2; RIN1; SHC3; SLC2A4; THRA	O60266; O60733; P00533; P01100; P01116; P05129; P05412; P06213; P06241; P06307; P06850; P10827; P14672; P15407; P16220; P17676; P23560; P28482; P29323; P30550; P35354; P40145; P42345; P42574; P49768; P50993; P51671; Q05513; Q08828; Q09472; Q13671; Q16665; Q92529; Q9NQ66; Q9NQU5; Q9P286
GO_BIOLOGICAL_PROCESS	response to virus	Unclassified	175	37	1.00384e-05	0.00011629	BCL2; BCL2L1; BCL3; CARD9; CCL11; CCL5; CD40; CDK6; CHUK; CXCL10; CXCR4; DDIT4; FOSL1; FOXP3; HIF1A; HSPB1; IFNA21; IFNA7; IKBKB; IKBKG; IL12B; IL21; IL23A; IRF1; IRF3; IRF7; ITCH; MAP3K14; MAPK11; MAPK14; NLRP3; PMAIP1; SRC; STAT1; STAT2; TBX21; TNF	O14920; O15111; P01375; P01567; P01568; P02778; P04792; P10415; P10914; P12931; P13501; P15407; P20749; P25942; P29460; P42224; P51671; P52630; P61073; Q00534; Q07817; Q13794; Q14653; Q15759; Q16539; Q16665; Q92985; Q96J02; Q96P20; Q99558; Q9BZS1; Q9H257; Q9HBE4; Q9NPF7; Q9NX09; Q9UL17; Q9Y6K9
GO_BIOLOGICAL_PROCESS	signal transduction in absence of ligand	Unclassified	30	14	3.47707e-07	5.46158e-06	BAD; BAX; BCL2; BCL2L1; BCL2L11; CASP3; CASP9; DCC; FOXO3; GSK3A; GSK3B; ITGAV; MCL1; MKNK2	O43521; O43524; P06756; P10415; P42574; P43146; P49840; P49841; P55211; Q07812; Q07817; Q07820; Q92934; Q9HBH9
GO_BIOLOGICAL_PROCESS	regulation of peptide hormone secretion	Unclassified	134	29	5.90378e-05	0.00055884	ADCY5; ADCY8; ARNTL; BAD; CCL5; CD38; CFTR; CLOCK; CRH; EGFR; FOXA2; GJA1; HIF1A; IRS2; JAK2; LEP; NOS2; PAX8; PLA2G6; PRKCA; PRKCE; PTPN11; RAC1; RAP1A; SLC2A1; SLC2A2; TIAM1; TNF; TNFSF11	O00327; O14788; O15516; O60674; O60733; O95622; P00533; P01375; P06850; P11166; P11168; P13501; P13569; P17252; P17302; P28907; P35228; P40145; P41159; P62834; P63000; Q02156; Q06124; Q06710; Q13009; Q16665; Q92934; Q9Y261; Q9Y4H2
GO_BIOLOGICAL_PROCESS	positive regulation of release of cytochrome c from mitochondria	Unclassified	20	9	6.7011e-05	0.000621233	BAD; BAX; BCL2L11; BID; MMP9; PLA2G6; PLAUR; PMAIP1; TNFSF10	O43521; O60733; P14780; P50591; P55957; Q03405; Q07812; Q13794; Q92934
GO_BIOLOGICAL_PROCESS	regulation of lipid kinase activity	Unclassified	55	16	7.42504e-05	0.000675294	CCR7; CDC42; FLT1; PIK3R1; PIK3R2; PIK3R3; PIK3R5; PIK3R6; PRKD1; PTK2; PTK2B; RB1; SRC; TGFB1; VAV2; VAV3	O00459; P01137; P06400; P12931; P17948; P27986; P32248; P52735; P60953; Q05397; Q14289; Q15139; Q5UE93; Q8WYR1; Q92569; Q9UKW4
GO_BIOLOGICAL_PROCESS	lipopolysaccharide-mediated signaling pathway	Signaling and pathways	33	12	5.33751e-05	0.00051403	AKT1; CCL2; CCL3; CCL5; HCK; IRF3; MAPK1; MAPK14; MAPK3; PRKCE; TGFB1; TNF	P01137; P01375; P08631; P10147; P13500; P13501; P27361; P28482; P31749; Q02156; Q14653; Q16539
GO_BIOLOGICAL_PROCESS	growth hormone receptor signaling pathway	Signaling and pathways	19	9	4.04845e-05	0.000403947	JAK2; JAK3; PIK3R1; PTK2; PXN; STAT3; STAT5A; STAT5B; STAT6	O60674; P27986; P40763; P42226; P42229; P49023; P51692; P52333; Q05397
GO_BIOLOGICAL_PROCESS	intrinsic apoptotic signaling pathway in response to DNA damage	Unclassified	53	16	4.49924e-05	0.000445834	ABL1; BAD; BAX; BCL2; BCL2L1; BCL2L11; BCL3; CASP9; CDKN1A; DDIT4; EP300; HMOX1; MCL1; PIK3R1; TNF; TNFRSF1B	O43521; P00519; P01375; P09601; P10415; P20333; P20749; P27986; P38936; P55211; Q07812; Q07817; Q07820; Q09472; Q92934; Q9NX09
GO_BIOLOGICAL_PROCESS	negative regulation of neuron death	Remodelling, survival and endothelial damage	142	42	6.2217e-11	1.72159e-09	AKT1; ATF4; BAX; BCL2; BCL2L1; BDNF; CBL; CCL2; CEBPB; CREB1; CSF1; EPO; F2R; FYN; GSK3B; HIF1A; HMOX1; HRAS; IKBKG; IL10; ILK; JAK2; JUN; KRAS; MAP2K4; NEFL; NRP1; PDPK1; PIK3CA; PPARA; PPARGC1A; PRKCG; PRKCI; PSEN1; PTK2B; RASA1; RHOA; STAT3; TERT; TNFRSF1B; TRAF2; UNC5B	O14746; O14786; O15530; O60674; P01112; P01116; P01588; P05129; P05412; P06241; P07196; P09601; P09603; P10415; P13500; P16220; P17676; P18848; P20333; P20936; P22301; P22681; P23560; P25116; P31749; P40763; P41743; P42336; P45985; P49768; P49841; P61586; Q07812; Q07817; Q07869; Q12933; Q13418; Q14289; Q16665; Q8IZJ1; Q9UBK2; Q9Y6K9
GO_BIOLOGICAL_PROCESS	cellular response to cadmium ion	Unclassified	25	14	1.73281e-08	3.47237e-07	AKT1; CHUK; CYBB; EGFR; FOS; GSN; HMOX1; JUN; MAPK1; MAPK3; MAPK8; MAPK9; MMP9; NCF1	O15111; P00533; P01100; P04839; P05412; P06396; P09601; P14598; P14780; P27361; P28482; P31749; P45983; P45984
GO_BIOLOGICAL_PROCESS	regulation of polysaccharide biosynthetic process	Unclassified	33	16	2.48494e-08	4.77985e-07	AKT1; AKT2; GSK3A; GSK3B; INSR; IRS2; MTOR; NFKB1; PPP1CA; PPP1CB; PPP1R3A; PPP1R3B; PPP1R3C; PPP1R3D; PPP1R3E; TGFB1	O95685; P01137; P06213; P19838; P31749; P31751; P42345; P49840; P49841; P62136; P62140; Q16821; Q86XI6; Q9H7J1; Q9UQK1; Q9Y4H2
GO_BIOLOGICAL_PROCESS	positive regulation of growth	Unclassified	164	41	2.63496e-08	5.01478e-07	AKT1; BCL2; BDNF; BMPR1A; BMPR2; CD38; CDC42; CREB1; CSF1; CXCR4; CYBA; CYFIP1; EDN1; EGFR; EZR; HAMP; HBEGF; ILK; INSR; KRT17; LEP; LIMK1; MAPK1; MAPK14; MMP14; MTOR; NRP1; PAK1; PIM1; PLCB1; PTK2B; RHOA; RPS6KA1; RPS6KA3; RPTOR; SLC6A3; SLC9A1; SMAD7; SPHK1; STAT5B; VEGFA	O14786; O15105; P00533; P05305; P06213; P09603; P10415; P11309; P13498; P15311; P15692; P16220; P19634; P23560; P28482; P28907; P31749; P36894; P41159; P42345; P50281; P51692; P51812; P53667; P60953; P61073; P61586; P81172; Q01959; Q04695; Q13153; Q13418; Q13873; Q14289; Q15418; Q16539; Q7L576; Q8N122; Q99075; Q9NQ66; Q9NYA1
GO_BIOLOGICAL_PROCESS	cell chemotaxis	Unclassified	146	38	2.70596e-08	5.13632e-07	BCAR1; CCL11; CCL17; CCL2; CCL3; CCL5; CCR2; CCR7; CRK; CRKL; CXCL1; CXCL10; CXCL2; CXCL3; CXCL8; CXCR4; EDN1; FLT1; GAB1; HBEGF; IL10; ITGB2; NCKAP1L; NRP1; PIK3CD; PIK3CG; PIP5K1A; PIP5K1C; PLA2G1B; PREX1; PRKCD; RAC1; SYK; TNFSF11; VAV1; VAV3; VCAM1; VEGFA	O00329; O14786; O14788; O60331; P02778; P04054; P05107; P05305; P09341; P10145; P10147; P13500; P13501; P15498; P15692; P17948; P19320; P19875; P19876; P22301; P32248; P41597; P43405; P46108; P46109; P48736; P51671; P55160; P56945; P61073; P63000; Q05655; Q13480; Q8TCU6; Q92583; Q99075; Q99755; Q9UKW4
GO_BIOLOGICAL_PROCESS	positive regulation of neuron death	Retynopathy and glia-related	85	27	3.40551e-08	6.34696e-07	ABL1; ATF2; ATF4; BAD; BAX; BCL2L11; CASP3; CASP9; CCL3; CDC42; DDIT4; EGR1; ELK1; FOS; FOXO3; FYN; GSK3A; GSK3B; ITGB2; JUN; MAP2K4; MAP3K11; MCL1; MTOR; PAK3; RHOA; TNF	O43521; O43524; O75914; P00519; P01100; P01375; P05107; P05412; P06241; P10147; P15336; P18146; P18848; P19419; P42345; P42574; P45985; P49840; P49841; P55211; P60953; P61586; Q07812; Q07820; Q16584; Q92934; Q9NX09
GO_BIOLOGICAL_PROCESS	regulation of cell size	Unclassified	107	31	3.71924e-08	6.89594e-07	ABL1; AKT1; AKT3; BDNF; BMPR2; CDK4; CREB1; CYFIP1; DCC; DNM2; EDN1; EZR; GNB3; GSK3B; ILK; IQGAP3; LIMK1; MTOR; NRP1; PAK1; RAC1; RHOA; RPTOR; SLC9A3R1; TRPV4; TSC1; ULK2; VAV1; VAV2; VAV3; VEGFA	O14745; O14786; P00519; P05305; P11802; P15311; P15498; P15692; P16220; P16520; P23560; P31749; P42345; P43146; P49841; P50570; P52735; P53667; P61586; P63000; Q13153; Q13418; Q13873; Q7L576; Q86VI3; Q8IYT8; Q8N122; Q92574; Q9HBA0; Q9UKW4; Q9Y243
GO_BIOLOGICAL_PROCESS	cellular response to inorganic substance	Unclassified	138	36	5.97244e-08	1.06351e-06	ADCY1; ADCY7; ADCY8; AKT1; BAD; BRAF; CDKN1B; CHUK; CREB1; CRK; CYBB; DNM2; EDN1; EEF2K; EGFR; FOS; FOSB; FOXO1; GSK3A; GSN; HMOX1; JUN; JUNB; JUND; KCNK3; MAPK1; MAPK3; MAPK8; MAPK9; MMP9; NCF1; PPARGC1A; PRKAA1; PRKAA2; PTGS2; TRAF2	O00418; O14649; O15111; P00533; P01100; P04839; P05305; P05412; P06396; P09601; P14598; P14780; P15056; P16220; P17275; P17535; P27361; P28482; P31749; P35354; P40145; P45983; P45984; P46108; P46527; P49840; P50570; P51828; P53539; P54646; Q08828; Q12778; Q12933; Q13131; Q92934; Q9UBK2
GO_BIOLOGICAL_PROCESS	response to carbohydrate	Unclassified	128	34	8.71742e-08	1.51848e-06	ADCY8; BAD; CASP3; CDKN1B; CYBA; EGR1; FOXO3; G6PC; GATA4; GJA1; ICAM1; IRS2; LDHA; LEP; LGALS1; MAP2K4; MAP2K6; MAPK13; NAMPT; NOX4; PIK3CA; PPARGC1A; PRKAA1; PRKAA2; PRKCB; PTGS2; PTK2B; RAF1; RAP1A; RAP1B; RHOA; SLC2A5; SLC8A1; SMAD2	O15264; O43524; P00338; P04049; P05362; P05771; P09382; P13498; P17302; P18146; P22732; P32418; P35354; P35575; P40145; P41159; P42336; P42574; P43490; P43694; P45985; P46527; P52564; P54646; P61224; P61586; P62834; Q13131; Q14289; Q15796; Q92934; Q9NPH5; Q9UBK2; Q9Y4H2
GO_BIOLOGICAL_PROCESS	response to light stimulus	Unclassified	187	43	1.62467e-07	2.7372e-06	AKT1; AKT2; ATF4; ATP1A2; BAX; BCL2; BCL3; CASP3; CASP9; CCK; CDKN1A; CLOCK; CREB1; CREBBP; DCT; DNM2; EGFR; ELK1; EP300; FOS; GNB1; GNGT1; GNGT2; HIF1A; IL12B; JUND; KRAS; MAP2K7; MAPK10; MAPK13; MAPK8; MMP1; MMP2; MMP9; MTOR; MYC; PIK3R1; PPP1CA; PPP1CB; PPP1CC; PRKAA1; PTGS2; TYR	O14610; O14733; O15264; O15516; P00533; P01100; P01106; P01116; P03956; P06307; P08253; P10415; P14679; P14780; P16220; P17535; P18848; P19419; P20749; P27986; P29460; P31749; P31751; P35354; P36873; P38936; P40126; P42345; P42574; P45983; P50570; P50993; P53779; P55211; P62136; P62140; P62873; P63211; Q07812; Q09472; Q13131; Q16665; Q92793
GO_BIOLOGICAL_PROCESS	regulation of autophagy	Unclassified	200	45	1.63392e-07	2.73995e-06	ABL1; ABL2; AKT1; BAD; BCL2; BCL2L11; CASP3; EIF4E; EP300; FOXO1; FOXO3; GATA4; GNAI3; GSK3A; GSK3B; HIF1A; HMOX1; HSPB1; IKBKG; IL10; KDR; LEP; MAP3K7; MAPK3; MAPK8; MCL1; MTOR; NAMPT; PIK3CA; PIK3CB; PIK3R2; PRKAA1; PRKAA2; PRKAB2; PRKAG1; PRKAG2; PRKAG3; PRKD1; PTK2; RPTOR; STAT3; TSC1; TSC2; ULK1; ULK2	O00459; O43318; O43521; O43524; O43741; O75385; P00519; P04792; P06730; P08754; P09601; P10415; P22301; P27361; P31749; P35968; P40763; P41159; P42336; P42338; P42345; P42574; P42684; P43490; P43694; P45983; P49815; P49840; P49841; P54619; P54646; Q05397; Q07820; Q09472; Q12778; Q13131; Q15139; Q16665; Q8IYT8; Q8N122; Q92574; Q92934; Q9UGI9; Q9UGJ0; Q9Y6K9
GO_BIOLOGICAL_PROCESS	regulation of polysaccharide metabolic process	Unclassified	37	16	1.85489e-07	3.08177e-06	AKT1; AKT2; GSK3A; GSK3B; INSR; IRS2; MTOR; NFKB1; PPP1CA; PPP1CB; PPP1R3A; PPP1R3B; PPP1R3C; PPP1R3D; PPP1R3E; TGFB1	O95685; P01137; P06213; P19838; P31749; P31751; P42345; P49840; P49841; P62136; P62140; Q16821; Q86XI6; Q9H7J1; Q9UQK1; Q9Y4H2
GO_BIOLOGICAL_PROCESS	positive regulation of cell growth	Unclassified	104	29	2.57375e-07	4.14219e-06	AKT1; BCL2; BDNF; BMPR2; CD38; CDC42; CXCR4; CYBA; CYFIP1; EDN1; EGFR; HAMP; HBEGF; ILK; KRT17; LIMK1; MMP14; MTOR; NRP1; PAK1; PTK2B; RHOA; RPS6KA1; RPS6KA3; RPTOR; SLC9A1; SMAD7; SPHK1; VEGFA	O14786; O15105; P00533; P05305; P10415; P13498; P15692; P19634; P23560; P28907; P31749; P42345; P50281; P51812; P53667; P60953; P61073; P61586; P81172; Q04695; Q13153; Q13418; Q13873; Q14289; Q15418; Q7L576; Q8N122; Q99075; Q9NYA1
GO_BIOLOGICAL_PROCESS	cell cycle arrest	Unclassified	100	28	3.78316e-07	5.92943e-06	ABL1; CDK6; CDKN1A; CDKN1B; CDKN2A; CDKN2B; CXCL8; FOXO4; HRAS; IL12B; ILK; IRF1; MAP2K1; MAP2K6; MAPK12; MTOR; MYC; PRKAA1; PRKAA2; PRKAB2; PRKAG1; PRKAG2; PRKAG3; RASSF1; RB1; RPTOR; SMAD3; TGFB1	O43741; P00519; P01106; P01112; P01137; P06400; P10145; P10914; P29460; P38936; P42345; P42771; P42772; P46527; P52564; P53778; P54619; P54646; P84022; P98177; Q00534; Q02750; Q13131; Q13418; Q8N122; Q9NS23; Q9UGI9; Q9UGJ0
GO_BIOLOGICAL_PROCESS	polysaccharide metabolic process	Unclassified	35	15	5.21413e-07	7.99797e-06	AKT1; AKT2; G6PC; GSK3A; GSK3B; PPP1CA; PPP1CB; PPP1CC; PPP1R3A; PPP1R3B; PPP1R3C; PPP1R3D; PPP1R3E; PRKAG2; PRKAG3	O95685; P31749; P31751; P35575; P36873; P49840; P49841; P62136; P62140; Q16821; Q86XI6; Q9H7J1; Q9UGI9; Q9UGJ0; Q9UQK1
GO_BIOLOGICAL_PROCESS	cellular polysaccharide metabolic process	Unclassified	35	15	5.21413e-07	7.99797e-06	AKT1; AKT2; G6PC; GSK3A; GSK3B; PPP1CA; PPP1CB; PPP1CC; PPP1R3A; PPP1R3B; PPP1R3C; PPP1R3D; PPP1R3E; PRKAG2; PRKAG3	O95685; P31749; P31751; P35575; P36873; P49840; P49841; P62136; P62140; Q16821; Q86XI6; Q9H7J1; Q9UGI9; Q9UGJ0; Q9UQK1
GO_BIOLOGICAL_PROCESS	positive regulation of response to biotic stimulus	Unclassified	157	37	6.42203e-07	9.7059e-06	CARD9; CCL5; CHUK; CREBBP; CYBA; EP300; FYN; HCK; HRAS; IKBKB; IKBKG; IL12B; IL21; IRF3; IRF7; KRAS; MAP3K7; MED1; MUC1; MUC4; NFKB1; NRAS; PAK1; PAK2; PAK3; PDPK1; PLCG2; PRKCA; PRKCD; RAF1; RASGRP1; RPS6KA5; SRC; STAT5B; SYK; TXK; VAV1	O14920; O15111; O15530; O43318; O75582; O75914; O95267; P01111; P01112; P01116; P04049; P06241; P08631; P12931; P13498; P13501; P15498; P15941; P16885; P17252; P19838; P29460; P42681; P43405; P51692; Q05655; Q09472; Q13153; Q13177; Q14653; Q15648; Q92793; Q92985; Q99102; Q9H257; Q9HBE4; Q9Y6K9
GO_BIOLOGICAL_PROCESS	cellular response to metal ion	Unclassified	120	31	6.40864e-07	9.7059e-06	ADCY1; ADCY7; ADCY8; AKT1; BRAF; CDKN1B; CHUK; CREB1; CYBB; EDN1; EEF2K; EGFR; FOS; FOSB; GSK3A; GSN; HMOX1; JUN; JUNB; JUND; KCNK3; MAPK1; MAPK3; MAPK8; MAPK9; MMP9; NCF1; PPARGC1A; PRKAA1; PRKAA2; PTGS2	O00418; O14649; O15111; P00533; P01100; P04839; P05305; P05412; P06396; P09601; P14598; P14780; P15056; P16220; P17275; P17535; P27361; P28482; P31749; P35354; P40145; P45983; P45984; P46527; P49840; P51828; P53539; P54646; Q08828; Q13131; Q9UBK2
GO_BIOLOGICAL_PROCESS	regulation of cysteine-type endopeptidase activity involved in apoptotic process	Unclassified	146	35	8.44784e-07	1.24028e-05	AKT1; BAD; BAX; BCL2L11; BID; BIRC2; BIRC3; BIRC5; CARD9; CASP9; CCK; EGLN3; F2R; GSN; JAK2; MMP9; MYC; NLRP3; PAK2; PLAUR; PMAIP1; PTGS2; RAF1; RHOA; RPS6KA1; RPS6KA3; SMAD3; SOX7; SRC; SYK; TNF; TNFSF10; TRAF2; VEGFA; XIAP	O15392; O43521; O60674; P01106; P01375; P04049; P06307; P06396; P12931; P14780; P15692; P25116; P31749; P35354; P43405; P50591; P51812; P55211; P55957; P61586; P84022; P98170; Q03405; Q07812; Q12933; Q13177; Q13489; Q13490; Q13794; Q15418; Q92934; Q96P20; Q9BT81; Q9H257; Q9H6Z9
GO_BIOLOGICAL_PROCESS	regulation of cysteine-type endopeptidase activity	Unclassified	159	37	8.96803e-07	1.30086e-05	AKT1; BAD; BAX; BCL2L11; BID; BIRC2; BIRC3; BIRC5; CARD9; CASP9; CCK; CYFIP2; EGLN3; F2R; FYN; GSN; JAK2; MMP9; MYC; NLRP3; PAK2; PLAUR; PMAIP1; PTGS2; RAF1; RHOA; RPS6KA1; RPS6KA3; SMAD3; SOX7; SRC; SYK; TNF; TNFSF10; TRAF2; VEGFA; XIAP	O15392; O43521; O60674; P01106; P01375; P04049; P06241; P06307; P06396; P12931; P14780; P15692; P25116; P31749; P35354; P43405; P50591; P51812; P55211; P55957; P61586; P84022; P98170; Q03405; Q07812; Q12933; Q13177; Q13489; Q13490; Q13794; Q15418; Q92934; Q96F07; Q96P20; Q9BT81; Q9H257; Q9H6Z9
GO_BIOLOGICAL_PROCESS	positive regulation of pri-miRNA transcription by RNA polymerase II	Unclassified	37	15	1.23738e-06	1.7523e-05	BMPR1A; EGR1; ETS1; FOS; FOSL1; FOXO3; HIF1A; IL10; JUN; SMAD3; SMAD4; STAT3; TERT; TGFB1; TNF	O14746; O43524; P01100; P01137; P01375; P05412; P14921; P15407; P18146; P22301; P36894; P40763; P84022; Q13485; Q16665
GO_BIOLOGICAL_PROCESS	peptidyl-tyrosine autophosphorylation	Unclassified	33	14	1.46322e-06	2.05194e-05	ABL1; EGFR; FYN; HCK; INSR; ITK; KDR; MAPK3; PTK2; PTK2B; SRC; SYK; TXK; ZAP70	P00519; P00533; P06213; P06241; P08631; P12931; P27361; P35968; P42681; P43403; P43405; Q05397; Q08881; Q14289
GO_BIOLOGICAL_PROCESS	regulation of pri-miRNA transcription by RNA polymerase II	Unclassified	47	17	1.61831e-06	2.25186e-05	BMPR1A; EGR1; ETS1; FOS; FOSL1; FOXO3; HIF1A; IL10; JUN; NFATC3; PPARA; SMAD3; SMAD4; STAT3; TERT; TGFB1; TNF	O14746; O43524; P01100; P01137; P01375; P05412; P14921; P15407; P18146; P22301; P36894; P40763; P84022; Q07869; Q12968; Q13485; Q16665
GO_BIOLOGICAL_PROCESS	response to cadmium ion	Unclassified	43	16	2.12717e-06	2.87107e-05	AKT1; CDKN1B; CHUK; CYBB; EGFR; FOS; GSN; HMOX1; JUN; MAPK1; MAPK3; MAPK8; MAPK9; MMP9; NCF1; TERT	O14746; O15111; P00533; P01100; P04839; P05412; P06396; P09601; P14598; P14780; P27361; P28482; P31749; P45983; P45984; P46527
GO_BIOLOGICAL_PROCESS	homeostasis of number of cells	Unclassified	133	32	2.31329e-06	3.10482e-05	ABL1; AKT1; AKT3; BAX; BCL2; BCL2L11; BCL6; CASP3; CCR2; CCR7; CSF1; EPO; F2R; FOXP3; HIF1A; HMOX1; JAK2; JAK3; KRAS; MED1; NCKAP1L; PLA2G2A; PMAIP1; PTPN11; RAC3; RB1; RPS6; SOS1; STAT5B; THRA; TNFAIP3; VEGFA	O43521; O60674; P00519; P01116; P01588; P06400; P09601; P09603; P10415; P10827; P14555; P15692; P21580; P25116; P31749; P32248; P41182; P41597; P42574; P51692; P52333; P55160; P60763; P62753; Q06124; Q07812; Q07889; Q13794; Q15648; Q16665; Q9BZS1; Q9Y243
GO_BIOLOGICAL_PROCESS	axon guidance	Unclassified	188	40	3.68962e-06	4.6896e-05	BDNF; BMPR1B; CXCR4; CYFIP1; DCC; ENAH; EPHB2; EPHB4; EPHB6; EZR; FYN; GAB1; GAB2; GRB2; IRS2; MAPK1; MAPK3; NRP1; NRP2; PIK3CA; PIK3CB; PIK3CD; PIK3R1; PLCG1; PRKCA; PTK2; PTPN11; RAC1; RAC2; RPS6KA5; SHC1; SHC3; SMAD4; SOS1; SRC; UNC5A; UNC5B; UNC5C; UNC5D; VEGFA	O00238; O00329; O14786; O15197; O60462; O75582; O95185; P06241; P12931; P15153; P15311; P15692; P17252; P19174; P23560; P27361; P27986; P28482; P29323; P29353; P42336; P42338; P43146; P54760; P61073; P62993; P63000; Q05397; Q06124; Q07889; Q13480; Q13485; Q6UXZ4; Q6ZN44; Q7L576; Q8IZJ1; Q8N8S7; Q92529; Q9UQC2; Q9Y4H2
GO_BIOLOGICAL_PROCESS	neuron projection guidance	Unclassified	189	40	4.23944e-06	5.3041e-05	BDNF; BMPR1B; CXCR4; CYFIP1; DCC; ENAH; EPHB2; EPHB4; EPHB6; EZR; FYN; GAB1; GAB2; GRB2; IRS2; MAPK1; MAPK3; NRP1; NRP2; PIK3CA; PIK3CB; PIK3CD; PIK3R1; PLCG1; PRKCA; PTK2; PTPN11; RAC1; RAC2; RPS6KA5; SHC1; SHC3; SMAD4; SOS1; SRC; UNC5A; UNC5B; UNC5C; UNC5D; VEGFA	O00238; O00329; O14786; O15197; O60462; O75582; O95185; P06241; P12931; P15153; P15311; P15692; P17252; P19174; P23560; P27361; P27986; P28482; P29323; P29353; P42336; P42338; P43146; P54760; P61073; P62993; P63000; Q05397; Q06124; Q07889; Q13480; Q13485; Q6UXZ4; Q6ZN44; Q7L576; Q8IZJ1; Q8N8S7; Q92529; Q9UQC2; Q9Y4H2
GO_BIOLOGICAL_PROCESS	response to hexose	Unclassified	101	26	5.57551e-06	6.78684e-05	ADCY8; BAD; CASP3; CDKN1B; CYBA; EGR1; FOXO3; GATA4; GJA1; ICAM1; IRS2; LDHA; LGALS1; NAMPT; NOX4; PIK3CA; PPARGC1A; PRKAA1; PRKAA2; PTGS2; PTK2B; RAF1; RHOA; SLC2A5; SLC8A1; SMAD2	O43524; P00338; P04049; P05362; P09382; P13498; P17302; P18146; P22732; P32418; P35354; P40145; P42336; P42574; P43490; P43694; P46527; P54646; P61586; Q13131; Q14289; Q15796; Q92934; Q9NPH5; Q9UBK2; Q9Y4H2
GO_BIOLOGICAL_PROCESS	female pregnancy	Unclassified	126	30	6.0393e-06	7.28972e-05	AKT1; BCL2; BMPR2; CD38; CRH; CTSB; EPO; ESR1; ETS1; FOS; FOSB; FOSL1; GJA1; JUNB; KRAS; LEP; MAPK1; MAPK3; MED1; MMP2; MMP9; MTOR; NAMPT; NPPA; PLA2G6; PTGS2; PTHLH; SLC2A1; SPHK2; STAT5B	O60733; P01100; P01116; P01160; P01588; P03372; P06850; P07858; P08253; P10415; P11166; P12272; P14780; P14921; P15407; P17275; P17302; P27361; P28482; P28907; P31749; P35354; P41159; P42345; P43490; P51692; P53539; Q13873; Q15648; Q9NRA0
GO_BIOLOGICAL_PROCESS	cell aging	Unclassified	47	16	8.16638e-06	9.64679e-05	ARNTL; BCL2; CDKN1A; CDKN2A; CDKN2B; HRAS; ICAM1; ILK; MAP2K1; MAPK14; MTOR; NOX4; PRKCD; SERPINE1; TBX3; TERT	O00327; O14746; O15119; P01112; P05121; P05362; P10415; P38936; P42345; P42771; P42772; Q02750; Q05655; Q13418; Q16539; Q9NPH5
GO_BIOLOGICAL_PROCESS	cellular response to alcohol	Unclassified	63	19	8.90475e-06	0.000104675	ADCY1; ADCY2; ADCY3; ADCY5; ADCY6; ADCY7; ADCY8; AKT1; CDK4; CFTR; CYBB; FOXO3; GNAI1; GNB1; GNG2; PRKAA1; PRKAA2; PRKCE; SPHK2	O43306; O43524; O60266; O95622; P04839; P11802; P13569; P31749; P40145; P51828; P54646; P59768; P62873; P63096; Q02156; Q08462; Q08828; Q13131; Q9NRA0
GO_BIOLOGICAL_PROCESS	regulation of cell aging	Unclassified	34	13	1.38062e-05	0.000156659	ABL1; AKT3; ARNTL; BCL6; BMPR1A; CDK6; CDKN2A; FOXM1; KRAS; MAP3K3; NAMPT; TERT; TWIST1	O00327; O14746; P00519; P01116; P36894; P41182; P42771; P43490; Q00534; Q08050; Q15672; Q99759; Q9Y243
GO_BIOLOGICAL_PROCESS	response to nerve growth factor	Signaling and pathways	40	14	2.10535e-05	0.000228789	AKT1; ARF6; ARPC3; BDNF; CBL; CREB1; CRK; EEF2K; FOXO3; PDPK1; RAP1A; RAPGEF1; TRPV1; WASF1	O00418; O15145; O15530; O43524; P16220; P22681; P23560; P31749; P46108; P62330; P62834; Q13905; Q8NER1; Q92558
GO_BIOLOGICAL_PROCESS	placenta development	Unclassified	102	25	2.12659e-05	0.000230055	AKT1; BIRC2; BMPR2; CDKN1B; CEBPB; CSF2; CTSB; EGFR; FOSL1; GJA1; GRB2; HIF1A; IL10; JUNB; LEP; MAP2K1; MAPK1; MAPK14; MAPK3; MED1; PTGS2; PTK2; RPS6; SNAI1; STK3	O95863; P00533; P04141; P07858; P15407; P17275; P17302; P17676; P22301; P27361; P28482; P31749; P35354; P41159; P46527; P62753; P62993; Q02750; Q05397; Q13188; Q13490; Q13873; Q15648; Q16539; Q16665
GO_BIOLOGICAL_PROCESS	positive regulation of cellular amide metabolic process	Unclassified	74	20	3.15043e-05	0.000321935	BCL3; CASP3; CCL5; CDK4; GSK3A; KRT17; MAPK1; MAPK3; MTOR; NCK2; PLA2G6; PLD1; PRKCD; PTK2B; RHOA; ROCK2; RPS6KB1; RPS6KB2; SPHK2; TNF	O43639; O60733; O75116; P01375; P11802; P13501; P20749; P23443; P27361; P28482; P42345; P42574; P49840; P61586; Q04695; Q05655; Q13393; Q14289; Q9NRA0; Q9UBS0
GO_BIOLOGICAL_PROCESS	positive regulation of peptidase activity	Unclassified	126	28	4.79573e-05	0.000470648	BAD; BAX; BCL2L11; BID; CARD9; CASP9; CCK; CYFIP2; EGLN3; F2R; FYN; GSN; JAK2; MAPK12; MAPK14; MAPK3; MYC; NLRP3; PMAIP1; RHOA; ROCK2; SMAD3; SOX7; STAT3; SYK; TNF; TNFSF10; TRAF2	O43521; O60674; O75116; P01106; P01375; P06241; P06307; P06396; P25116; P27361; P40763; P43405; P50591; P53778; P55211; P55957; P61586; P84022; Q07812; Q12933; Q13794; Q16539; Q92934; Q96F07; Q96P20; Q9BT81; Q9H257; Q9H6Z9
GO_BIOLOGICAL_PROCESS	response to alkaloid	Unclassified	88	22	4.78498e-05	0.000470648	ADCY8; BCL2L1; CASP3; CASP6; CRH; CXCR4; DNM2; FOSB; GNAO1; ICAM1; MTOR; OPRM1; PPARGC1A; PPP2R2A; PRKAA1; PRKCE; PRKCG; PTK2B; SLC6A3; SLC8A1; TIAM1; TRPV1	P05129; P05362; P06850; P09471; P32418; P35372; P40145; P42345; P42574; P50570; P53539; P55212; P61073; P63151; Q01959; Q02156; Q07817; Q13009; Q13131; Q14289; Q8NER1; Q9UBK2
GO_BIOLOGICAL_PROCESS	regulation of peptidyl-serine phosphorylation	Unclassified	107	25	5.06425e-05	0.000492327	AKT1; ARAF; BAX; BCL2; BDNF; BRAF; DDIT4; EGFR; GSK3A; IFNA21; IFNA7; NCK2; NOS1; PAK1; PIK3CA; PRKAA1; PRKD1; PRKD2; PTGS2; RAF1; RPTOR; SMAD7; TGFB1; TNF; VEGFA	O15105; O43639; P00533; P01137; P01375; P01567; P01568; P04049; P10398; P10415; P15056; P15692; P23560; P29475; P31749; P35354; P42336; P49840; Q07812; Q13131; Q13153; Q15139; Q8N122; Q9BZL6; Q9NX09
GO_BIOLOGICAL_PROCESS	regulation of circadian rhythm	Unclassified	83	21	5.86597e-05	0.000556726	ADCY1; ARNTL; CLOCK; CREB1; CREM; CRH; CSF2; GSK3B; MAPK10; MAPK8; MAPK9; MTOR; PPARA; PPARGC1A; PPP1CA; PPP1CB; PPP1CC; PRKAA1; PRKAA2; PRKCG; ROCK2	O00327; O15516; O75116; P04141; P05129; P06850; P16220; P36873; P42345; P45983; P45984; P49841; P53779; P54646; P62136; P62140; Q03060; Q07869; Q08828; Q13131; Q9UBK2
GO_BIOLOGICAL_PROCESS	positive regulation of peptidyl-tyrosine phosphorylation	Unclassified	161	33	5.88387e-05	0.000557689	ABL1; ACE; BDNF; CCK; CCL5; CD40; CSF2; EPO; FCGR1A; FYN; HBEGF; ICAM1; IL12B; IL21; IL23A; IL5; ITGB3; JAK2; LEP; MTOR; NCF1; NOX4; NRP1; PAK2; PTK2B; PTPN11; SRC; STAT3; SYK; TGFA; TGFB1; TNF; VEGFA	O14786; O60674; P00519; P01135; P01137; P01375; P01588; P04141; P05106; P05113; P05362; P06241; P06307; P12314; P12821; P12931; P13501; P14598; P15692; P23560; P25942; P29460; P40763; P41159; P42345; P43405; Q06124; Q13177; Q14289; Q99075; Q9HBE4; Q9NPF7; Q9NPH5
GO_BIOLOGICAL_PROCESS	cellular response to growth hormone stimulus	Unclassified	20	9	6.7011e-05	0.000621233	JAK2; JAK3; PIK3R1; PTK2; PXN; STAT3; STAT5A; STAT5B; STAT6	O60674; P27986; P40763; P42226; P42229; P49023; P51692; P52333; Q05397
GO_BIOLOGICAL_PROCESS	positive regulation of autophagy	Unclassified	78	20	7.16001e-05	0.000652014	BAD; BCL2L11; FOXO1; FOXO3; GNAI3; GSK3A; GSK3B; HIF1A; HMOX1; IKBKG; KDR; MAP3K7; MAPK3; PIK3CB; PRKAA1; PRKAA2; PRKD1; TSC2; ULK1; ULK2	O43318; O43521; O43524; O75385; P08754; P09601; P27361; P35968; P42338; P49815; P49840; P49841; P54646; Q12778; Q13131; Q15139; Q16665; Q8IYT8; Q92934; Q9Y6K9
GO_BIOLOGICAL_PROCESS	regulation of lipase activity	Unclassified	79	20	8.69359e-05	0.000777014	ABL1; ABL2; APOA5; APOC3; BDNF; CCL5; EGFR; ESR1; FLT1; GNA13; HRAS; ITK; PDPK1; PLA2G1B; PLCB2; PLCG1; PRKCZ; RASGRP1; RHOA; TXK	O15530; O95267; P00519; P00533; P01112; P02656; P03372; P04054; P13501; P17948; P19174; P23560; P42681; P42684; P61586; Q00722; Q05513; Q08881; Q14344; Q6Q788
GO_BIOLOGICAL_PROCESS	negative regulation of autophagy	Unclassified	51	15	0.000108317	0.00093545	AKT1; BCL2; EIF4E; GATA4; HMOX1; IL10; LEP; MCL1; MTOR; NAMPT; PIK3CA; PTK2; STAT3; TSC1; TSC2	P06730; P09601; P10415; P22301; P31749; P40763; P41159; P42336; P42345; P43490; P43694; P49815; Q05397; Q07820; Q92574

## Sheet: S4
Supplementary Table S4: Summary of information found in the scientific literature supporting the predicted mechanisms for intravitreal aflibercept injection represented in Supplementary Figure S1. Node A to Node B column refer to the nodes represented in Supplementary Figure S1. Activation induced by Node A to Node B column indicates whether the first node of the interaction (Node A) activates (1…
LINK	PROTNAME_A	NODE A	UNIPROT_A	PROTNAME_B	NODE B	UNIPROT_B	ACTIVATION	REFERENCE	EVIDENCE	LINK_TYPE
1	PIK3CD	PI3K	O00329	RAF1	Not represented	P04049	1	PMID: 16935846	the IGF-I-induced activation of Rap1, Raf-1, ERK, and PRL release were blocked by inhibiting PI3K/Akt.	VALIDATED
2	PIK3CD	PI3K	O00329	SRC	SRC	P12931	1	PMID: 27169346	The protein kinase activity of PI3K phosphorylates serine residue 70 on Src to enhance its activity	VALIDATED
3	PIK3CD	PI3K	O00329	PLCG2	Not represented	P16885	1	Kegg: hsa04664-Fc epsilon RI signaling pathway // PMID: 19017959; Kegg: hsa04664-Fc epsilon RI signaling pathway // PMID: 19017959//; Kegg: hsa04664-Fc epsilon RI signaling pathway // PMID: 19017959//Kegg: hsa04664-Fc epsilon RI signaling pathway // PMID: 19017959////; Kegg: hsa04664-Fc epsilon RI signaling pathway // PMID: 19017959//Kegg: hsa04664-Fc epsilon RI signaling pathway // PMID: 1901795…	We and others have shown that Btk enhances Fc¿RI-mediated PLC¿1 activation in a PI3K-dependent manner. […] This conclusion is supported by the fact that phosphorylation of Btk, PLC¿1 and PLC¿2 was reduced following treatment of wild type BMMCs with the PI3K inhibitors; We and others have shown that Btk enhances Fc¿RI-mediated PLC¿1 activation in a PI3K-dependent manner. […] This conclusion is sup…	VALIDATED
4	PIK3CD	PI3K	O00329	AKT2	AKT	P31751	1	[1] PMID: 26233890 [2] PMID: 19951971 [3]KEGG: hsa04380 - Osteoclast differentiation; [1] PMID: 26233890 [2] PMID: 19951971 [3]KEGG: hsa04380 - Osteoclast differentiation [4] PMID: 20584748 [5] PMID: 23576023; [1] PMID: 26233890 [2] PMID: 19951971 [3]KEGG: hsa04380 - Osteoclast differentiation; [1] PMID: 26233890 [2] PMID: 19951971 [3]KEGG: hsa04380 - Osteoclast differentiation [4] PMID: 20584748…	[1] The serine/threonine kinase AKT (also known as protein kinase B), comprising a group of three isoforms (AKT1, AKT2, and AKT3) in mammals, is a key propagator of PI3K signaling. In the canonical PI3K/AKT activation model, AKT and its upstream kinase, 3-phosphoinositide-dependent protein kinase-1 (PDK1), are recruited to the inner cell membrane via interactions of their PH domains with PtdIns(3…	VALIDATED
5	PIK3CD	PI3K	O00329	PRKCZ	aPKC	Q05513	1	DOI 10.1074/jbc.M508810200	The mechanism of PI3K activation of PKC involves PDK1, a kinase known to phosphorylate PKC	VALIDATED
6	PIK3CD	PI3K	O00329	Diabetic Macular Edema		Diabetic Macular Edema	1
7	PIK3CD	PI3K	O00329	AKT1	AKT	P31749	1	PMID: 12933816; PMID: 12933816; [1] PMID: 20584748 [2] PMID: 23576023 [3] PMID: 12933816; kegg: hsa04012 [4] hsa04151; kegg: hsa04012 // hsa04151; [1] PMID: 20584748 [2] PMID: 23576023 [3] PMID: 12933816; kegg: hsa04012 [4] hsa04151; kegg: hsa04012 // hsa04151	Androgen activates phosphatidylinositol 3-kinase (PI3K) and Akt, including AKT1 and AKT2, in AR-positive cells. AR interacts with the p85 regulatory subunit of PI3K, and its binding affinity is increased after androgen stimulation. Activation of PI3K/Akt by androgen was inhibited by dominant-negative Src. . These findings indicate that a triple complex between AR, p85 , and Src is required for an…	VALIDATED
7	PIK3CD	PI3K	O00329	AKT3	AKT	Q9Y243	1	[1] PMID: 20584748 [2] PMID: 23576023	[1] The PI3K–Akt mediates oncogenic Met-induced centrosome amplification and chromosome instability [2] HGF/c-met signaling system promotes cellular growth and angiogenesis through PI3K/phosphor-Akt;; [1] The PI3K–Akt mediates oncogenic Met-induced centrosome amplification and chromosome instability [2] HGF/c-met signaling system promotes cellular growth and angiogenesis through PI3K/phosphor-Akt;	VALIDATED
8	CLD5	Not represented	O00501	Diabetic Macular Edema		Diabetic Macular Edema	-1
9	ANGPT2	ANGPT2	O15123	Diabetic Macular Edema		Diabetic Macular Edema	1
10	ANGPT2	ANGPT2	O15123	Diabetic Macular Edema		Diabetic Macular Edema	-1
11	FOS	AP-1	P01100	MMP1	MMP1	P03956	1	PMID: 17082773	This effect requires Fos-dependent transcriptional activation of a matrix metalloprotease gene mmp1 downstream of JNK.	VALIDATED
12	PDGFB	PDGFB	P01127	TEK	Not represented	Q02763	1	[1] 10.1007/s10456-009-9147-3 ; [2] doi.org/10.1038/ncomms15296	[1] Ang-1, which is upregulated by PDGF-B, promotes pericyte migration […] Ang-1 and Ang-2 are specific ligands of TEK binding the receptor with similar affinity. TEK activation promotes vessel assembly and maturation by mediating survival signals for endothelial cells and regulating the recruitment of mural cells. Ang-1 acts in a paracrine agonistic manner inducing TEK phosphorylation and subseq…	VALIDATED
13	PDGFB	PDGFB	P01127	Diabetic Macular Edema		Diabetic Macular Edema	1
14	PDGFB	PDGFB	P01127	Diabetic Macular Edema		Diabetic Macular Edema	-1
15	TGFB1	TGFB1	P01137	Diabetic Macular Edema		Diabetic Macular Edema	1
16	TNF	TNF	P01375	ICAM1	ICAM1	P05362	1	PMID: 10837365 // PMID: 15389590 // PMID: 1357985; PMID: 17292586///PMID: 8937718	The results support the following pathway, whereby TNF-alpha enhances expression of ICAM-1 in NHBE cells: TNF-alpha --> TNF-RI --> PC-PLC --> DAG --> PKC --> (NF-kappaB?) --> ICAM-1 mRNA --> ICAM-1 surface expression. // Pretreatment of HUVEC with forskolin significantly upregulated tumor necrosis factor alpha (TNF-alpha)- and interleukin-1 alpha (IL1-alpha)-induced ICAM-1 surface expression // I…	VALIDATED
17	TNF	TNF	P01375	JUN	AP-1	P05412	1	PMID: 19553068; PMID: 19553068//; [1] PMID: 9118946 [2] PMID: 20333651	The expression of the AP-1 family members c-Jun, c-Fos and JunB and phosphorylation levels of c-Jun were upregulated by TNF-a; The expression of the AP-1 family members c-Jun, c-Fos and JunB and phosphorylation levels of c-Jun were upregulated by TNF-a//; Tumor necrosis factor alpha-induced activation of c-jun N-terminal kinase is mediated by TRAF2 [2] TNF-alpha induces MMP-9 expression via the T…	VALIDATED
18	TNF	TNF	P01375	FCGR1	Not represented	P12314	1	PMID: 31307477	(CD46=FCGR1)we found that the expression of complement regulators (CD46, CD55 and CD59) increased in PIECs exposed to human TNF-α[...]we found that TNF-α increased the mRNA level of CD46, CD55 and CD59 (Fig. 3a). We also checked the protein level of CD46 and CD55 by flow cytometry and found that CD46 and CD55 were upregulated by TNF-α in the human antibody-mediated CDC model	VALIDATED
19	TNF	TNF	P01375	VEGFR1	VEGFR1	P17948	1	PMID: 33640465	PlGF-induced VEGFR1 activation increased TNF-α and IL-6 expression, whereas TNF-α and IL-1β upregulated VEGFR1	VALIDATED
20	TNF	TNF	P01375	EGR1	EGR1	P18146	1	PMID: 20332214; PMID: 11689211	Egr-1 is rapidly induced by TNFα; We observed a rapid increase in TNF -induced expression of Ets-1, Egr-1 and c-fos protein in macrophages by 12-, 12.8- and 11.3-fold within 1 h (all P 0.05).	VALIDATED
21	TNF	TNF	P01375	TNR1A	Not represented	P19438	1	PMID: 29202842; Uniprot: P19438	Receptor for TNFSF2/TNF-alpha and homotrimeric TNFSF1/lymphotoxin-alpha.; The TNFR1 is activated through both soluble and membrane TNF-α	VALIDATED
22	TNF	TNF	P01375	NFKB1	NFKB	P19838	1	PMID: 19181934; PMID: 19181934//; PMID: 19181934//PMID: 19181934////; PMID: 19181934; PMID: 19181934//; PMID: 19181934//PMID: 19181934////; PMID: 19181934; PMID: 19181934//; PMID: 19181934//PMID: 19181934////; PMID: 19181934; PMID: 19181934//; PMID: 19181934//PMID: 19181934////	The present study shows that TNF-a-induced activation of the NFkB pathway plays a critical role in cardiomyocyte apoptosis.; The present study shows that TNF-a-induced activation of the NFkB pathway plays a critical role in cardiomyocyte apoptosis.//; The present study shows that TNF-a-induced activation of the NFkB pathway plays a critical role in cardiomyocyte apoptosis.//The present study show…	VALIDATED
23	TNF	TNF	P01375	MTOR	Not represented	P42345	1	PMID: 19812304	Pro-inflammatory cytokines, such as TNF, activate IkB kinase-ß (IKKß), which physically interacts with and inactivates TSC1, leading to mTORC1 activation.; Pro-inflammatory cytokines, such as TNF, activate I¿B kinase-ß (IKKß), which physically interacts with and inactivates TSC1, leading to mTORC1 activation	VALIDATED
24	TNF	TNF	P01375	MK09	Not represented	P45984	1	KEGG:hsa04668; KEGG:hsa04668; [1] PMID: 25609706 [2] PMID: 9118946; [1] PMID: 25609706 [2] PMID: 9118946	TNF leads to the activation of TAB2 and MAPK9 in its normal signaling; TNF leads to the activation of TAB2 and MAPK9 in its normal signaling; [1] These findings reveal that APP3m is a new member of the TNF-TNFR2 signaling complex and characterize an APP3-mediated TNFR2 signal transduction mechanism that induces activation of JNK1 and JNK2 [2] Our findings suggest that TNF alpha-mediated JNK activ…	VALIDATED
25	TNF	TNF	P01375	NFKB2	NFKB	Q00653	1	PMID: 19181934;	The present study shows that TNF-a-induced activation of the NFkB pathway plays a critical role in cardiomyocyte apoptosis.;	VALIDATED
26	TNF	TNF	P01375	IKBKG	Not represented	Q9Y6K9	1	KEGG: hsa04210 - Apoptosis // PMID: 16603399	TNF (TNF) activates IKBKG via RIP1/TRAF2 // The receptor interacting protein kinase 1 (RIP1) is essential for the activation of nuclear factor ¿B (NF-¿B) by tumor necrosis factor a (TNF). [...] polyubiquitinated RIP1 recruits IKK through the binding between the polyubiquitin chains and IKBKG, a regulatory subunit of the IKK complex.	VALIDATED
27	TNF	TNF	P01375	Diabetic Macular Edema		Diabetic Macular Edema	1
28	TNF	TNF	P01375	MK08	Not represented	P45983	1	PMID: 25675437	TNF-a-stimulated JNK1/2 was also reduced by Rottlerin or SP600125.; TNF-a-stimulated JNK1/2 was also reduced by Rottlerin or SP600125.	VALIDATED
28	TNF	TNF	P01375	MK10	Not represented	P53779	1	PMID: 9118946	Our findings suggest that TNF alpha-mediated JNK activation in fibroblasts is independent of the cell death pathway and that TRAF2 occupies a key role in TNF receptor signaling to JNK.	VALIDATED
29	FN1	FN1	P02751	Diabetic Macular Edema		Diabetic Macular Edema	1
30	ESR1	Not represented	P03372	BCL2	Not represented	P10415	1	PMID: 10504548; PMID: 23845438	Bcl-2 immunostaining displayed a negative correlation with increasing histologic grade, p53 and MIB-1 (P < 0.0001, P < 0.05 and P < 0.0001, respectively) and a positive correlation with rising ER immunostaining (r 5 0.305, P < 0.0001). The activated ER dimerizes and binds classically to estrogen response elements on target genes controlling proliferation and survival. The gene encoding the antiap…	VALIDATED
31	MMP1	MMP1	P03956	Diabetic Macular Edema		Diabetic Macular Edema	1
32	RAF1	Not represented	P04049	BCL2	Not represented	P10415	1	PMID: 15849194	The balance between the Bcl-2 bound in protective complexes and the Bcl-2 bound in inhibitory complexes is thought to be critical in determining whether a cell will survive or undergo apoptosis. Proteins that form protective complexes include the protein kinase Raf-1 and a Bcl-2 family member, Bcl-XL. In contrast, BAD is a Bcl-2 family member that binds to Bcl-2 to form an inhibitory complex. How…	VALIDATED
33	IL6	IL6	P05231	IL6R	Not represented	P08887	1	KEGG: 04060; KEGG: 04060; KEGG: 04060; KEGG: 04060; KEGG: hsa04060; PMID: 22029668; PMID: 22029668; KEGG: hsa04060; PMID: 22029668; PMID: 22029668; KEGG: 04060; KEGG: hsa04060; PMID: 22029668; PMID: 22029668; KEGG: hsa04060; PMID: 22029668; PMID: 22029668; KEGG: 04060; KEGG: 04060; KEGG: hsa04060; PMID: 22029668; PMID: 22029668; KEGG: hsa04060; PMID: 22029668; PMID: 22029668; KEGG: 04060; KEGG: h…	04060 - Cytokine-cytokine receptor interaction; 04060 - Cytokine-cytokine receptor interaction; 04060 - Cytokine-cytokine receptor interaction; 04060 - Cytokine-cytokine receptor interaction; Cytokine-cytokine receptor interaction - Homo sapiens (human); IL (interleukin)-6, which was originally identified as a B-cell differentiation factor, is a multifunctional cytokine that regulates the immune …	VALIDATED
34	IL6	IL6	P05231	STAT3	JAK/STAT	P40763	1	PMID: 18023015; PMID: 18023015; PMID: 24082147; PMID: 24082147//; PMID: 24082147; PMID: 24082147//; PMID: 24082147; PMID: 24082147//; PMID: 24082147; PMID: 24082147//	STAT3 activation in response to IL-6 is prolonged by the binding of IL-6 receptor to EGF receptor.; STAT3 activation in response to IL-6 is prolonged by the binding of IL-6 receptor to EGF receptor.//; STAT3 activation in response to IL-6 is prolonged by the binding of IL-6 receptor to EGF receptor.; STAT3 activation in response to IL-6 is prolonged by the binding of IL-6 receptor to EGF receptor…	VALIDATED
35	IL6	IL6	P05231	Diabetic Macular Edema		Diabetic Macular Edema	1
36	IL6	IL6	P05231	JAK1	JAK/STAT	P23458	1	PMID: 23333246; PMID: 23333246 // PMID: 24418198	Our mammosphere formation data showed that secreted IL-6 from non-CSCs activates the JAK1-STAT signal transduction pathway and upregulates CSC-associated OCT-4 gene expression.; Our mammosphere formation data showed that secreted IL-6 from non-CSCs activates the JAK1-STAT signal transduction pathway and upregulates CSC-associated OCT-4 gene expression. // IL-6 first associates with its specific r…	VALIDATED
36	IL6	IL6	P05231	JAK2	JAK/STAT	O60674	1	PMID: 24418198	IL-6 first associates with its specific receptor alpha chain, IL-6Ra, and this dimer then associates with gp130 to form a hexameric complex. Once the gp130 dimer is occupied there is an autoactivation of associated JAKs (Janus Kinases) which are found in an inactive state prior to cytokine exposure. JAK1, JAK2 and TYK2 have all been found associated with gp130	VALIDATED
36	IL6	IL6	P05231	JAK3	JAK/STAT	P52333	1	PMID: 14976041	We report here that Janus kinase 3 (Jak3) is a primary response gene for interleukin-6 (IL-6) in macrophage differentiation, and ectopic overexpression of Jak3 accelerates monocytic differentiation of normal mouse bone marrow cells stimulated with cytokines.	VALIDATED
37	ICAM1	ICAM1	P05362	Diabetic Macular Edema		Diabetic Macular Edema	1
38	JUN	AP-1	P05412	TNF	TNF	P01375	1	PMID: 22933572; PMID: 22933572//	TNF expression occurred during the TVX pretreatment period. Indeed, TVX exposure increased activation of extracellular signal-regulated kinase (ERK), c-Jun N-terminal kinase (JNK), and p38 mitogen-activated protein kinase. Inhibition of either ERK or JNK decreased the TVX-mediated increase in TNF mRNA ; TNF expression occurred during the TVX pretreatment period. Indeed, TVX exposure increased act…	VALIDATED
39	JUN	AP-1	P05412	MMP1	MMP1	P03956	1	PMID: 17106880	Oxidative stress-induced c-Jun N-terminal kinase (JNK) activation in tendon cells upregulates MMP1 mRNA and protein expression	VALIDATED
40	JUN	AP-1	P05412	IL6	IL6	P05231	1	PMID: 15158360; PMID: 15158360//PMID: 25445542//; PMID: 25445542	In JNK1(-/-) mice, our findings were associated with a reduced acute phase response as evidenced by a lower activation of the IL-6/STAT3/SAA-1 cascade.; In JNK1(-/-) mice, our findings were associated with a reduced acute phase response as evidenced by a lower activation of the IL-6/STAT3/SAA-1 cascade.//Induction of the IL-6 promoter by p65, C/EBPd or c-Jun […] Taken together, these results demo…	VALIDATED
41	JUN	AP-1	P05412	MMP2	Not represented	P08253	1	PMID: 30302545	Activator protein-1 (AP-1) transcription, composed of c-jun and c-Fos proteins, has been shown to be the principal regulator of multiple MMP transcriptions under a variety of conditions, also in diabetic wounds. Specifically, MMP-2 and MMP-9's transcriptions are known to be modulated by AP-1. [...] ES products of L. sericata may enhance the process of wound healing in phases of inflammation, prol…	VALIDATED
42	JUN	AP-1	P05412	CXCL8	CXCL8	P10145	1	PMID: 24291243; PMID: 25058399	As shown in Figure 5D, HPV-16 oncoprotein-induced HIF-1a protein expression was down-regulated when c-Jun was inhibited by c-Jun siRNA. Expectantly, HPV-16 oncoprotein-induced VEGF and IL-8 protein secretion in NSCLC cells was also decreased in response to c-Jun knockdown (Figure 5E); Jellyfish collagen stimulates production of TNF-a and IL-6 by J774.1 cells through activation of NF-¿B and JNK vi…	VALIDATED
43	JUN	AP-1	P05412	CCL2	CCL2	P13500	1	PMID: 23583295	these findings strongly suggest that the increased binding of transcription factors to NF-κB and AP-1 elements in the CCL2 promoter is responsible for the active transcription expression of CCL2 in pulmonary fibrosis.	VALIDATED
44	JUN	AP-1	P05412	VCAM1	VCAM1	P19320	1	PMID: 25098198 // PMID: 26829121	Decreased PMN rolling/adhesion to hCMEC/D3 was associated with CORM-3-dependent inhibition of MAPK JNK1/2 activation (Tyr-phosphorylation), inhibition of transcription factor, AP-1 (c-Jun phosphorylation), and subsequent suppression of VCAM-1 expression (p < 0.05). // PDTC (a specific inhibitor of NF-κB) and Curcumin (a potent inhibitor of AP-1) [...] Furthermore, anti-β2GPI-induced expression of…	VALIDATED
45	JUN	AP-1	P05412	PTGS2	Not represented	P35354	1	PMID: 29433067	Only the 30-min inducible Set 1 (CCL20, CCL4, CCL3, PTGS2, and TNF) plus IL6 exhibited increased c-Jun on the promoter after LPS and the final promoter binding was higher in LPS-treated 30- min promoters than in 60-min promoters (Fig. 3C)	VALIDATED
46	JUN	AP-1	P05412	CCL5	CCL5	P13501	1	PMID: 24658403	Akt, p38MAPK, NF-κB, CEBP, and AP-1 pathways play a role in Nef-mediated CCL5 expression. The results demonstrated that the PI3K/Akt and p38 MAPK pathways, along with the transcription factors NF-κB, CEBP, and AP-1, are involved in Nef-induced CCL5 production in astrocytes.	VALIDATED
46	JUN	AP-1	P05412	IL1B	IL1B	P01584	1	PMID: 10936515 // PMID: 7885041; PMID: 18566416	We focused analyses on c-Jun and c-fos, which have been shown to be important for inducible IL-1ß transcription in overexpression and in vitro binding assays. ; Treatment of RAW 264.7 cells with DEX inhibited DNA binding of NF-kappaB/Rel and AP-1 proteins to their cognate DNA sites as measured by electrophoretic mobility shift assay (EMSA). DEX treatment caused a significant reduction in nuclear …	VALIDATED
47	MMP2	Not represented	P08253	Diabetic Macular Edema		Diabetic Macular Edema	1
48	IL6R	Not represented	P08887	SRC	SRC	P12931	1	PMID: 27383632 // PMID: 24801617	Interleukin-6 Induces Vascular Endothelial Growth Factor-C Expression via Src-FAK-STAT3 Signaling in Lymphatic Endothelial Cells. // IL-6 mainly upregulates motility activity via activation of Src signaling pathway in human gastric cancer cells.	VALIDATED
49	FGF2	FGF2	P09038	Diabetic Macular Edema		Diabetic Macular Edema	1
50	CXCL8	CXCL8	P10145	Diabetic Macular Edema		Diabetic Macular Edema	1
51	BCL2	Not represented	P10415	Diabetic Macular Edema		Diabetic Macular Edema	1
52	FCGR1	Not represented	P12314	PTGS2	Not represented	P35354	1	KEGG	PW:05140-Leishmaniasis	VALIDATED
53	FCGR1	Not represented	P12314	MK11	Not represented	Q15759	1	PMID: 26497515	P38 MAPK is part of the signalling cascade downstream of FCGR1	VALIDATED
53	FCGR1	Not represented	P12314	MK12	Not represented	P53778	1	PMID: 26497515	P38 MAPK is part of the signalling cascade downstream of FCGR1	VALIDATED
53	FCGR1	Not represented	P12314	MK13	Not represented	O15264	1	PMID: 26497515	P38 MAPK is part of the signalling cascade downstream of FCGR1	VALIDATED
53	FCGR1	Not represented	P12314	MK14	Not represented	Q16539	1	PMID: 26497515	P38 MAPK is part of the signalling cascade downstream of FCGR1	VALIDATED
54	SRC	SRC	P12931	FOS	AP-1	P01100	1	PMID: 22105363 // PMID: 2474755	The kinase c-Src and the phosphatase TC45 coordinately regulate c-Fos tyrosine phosphorylation and c-Fos phospholipid synthesis activation capacity. // Gene regulation by tyrosine kinases: src protein activates various promoters, including c-fos.	VALIDATED
55	SRC	SRC	P12931	PDGFB	PDGFB	P01127	1	PMID: 12819032	These findings suggest that active Src participates in PDGF-B-dependent regeneration of tubular cells from acute ischemic injury. […] Our present findings provide evidence that active Src kinase might play a pivotal role in the acute phase of PDGF-B-dependent tubular regeneration.	VALIDATED
56	SRC	SRC	P12931	ESR1	Not represented	P03372	1	[1] PMID: 17627304 [2] PMID: 24648347	[1] Estrogen-ERa binding promotes a rapid and transient interaction of ERa with cellular Src (cSrc), binding to Shc and Ras-MAPK activation [2] The steroid receptor coactivator (SRC)-1 enhances the activity of the estrogen receptor in breast cancer cells, where it confers cell survival benefits.	VALIDATED
57	SRC	SRC	P12931	RAF1	Not represented	P04049	1	PMID: 8876196 // PMID: 10205168	In addition, JAK2 phosphorylated Raf-1 at sites different from those phosphorylated by pp60v-src. // Expression of Raf-1 with oncogenic Ras gives predominantly S338 phosphorylation, whereas activated Src gives predominantly Y341 phosphorylation. Phosphorylation at both sites is maximal only when both oncogenic Ras and activated Src are present.	VALIDATED
58	SRC	SRC	P12931	CTNNB1	CTNNB1	P35222	1	PMID: 23824743	Activated Src can also phosphorylate ß-catenin, causing its release from E-cadherin sequestration at the plasma membrane and enhancing its nuclear localization; Activated Src can also phosphorylate ß-catenin, causing its release from E-cadherin sequestration at the plasma membrane and enhancing its nuclear localization	VALIDATED
59	SRC	SRC	P12931	STAT3	JAK/STAT	P40763	1	PMID: 12244095; PMID: 12244095; PMID: 12244095; PMID: 12244095; PMID: 19372587 // PMID: 12244095; [1] PMID: 19372587 [2] PMID: 12244095; PMID: 19372587 // PMID: 12244095; [1] PMID: 19372587 [2] PMID: 12244095; PMID: 12244095; PMID: 19372587 // PMID: 12244095; [1] PMID: 19372587 [2] PMID: 12244095; PMID: 19372587 // PMID: 12244095; [1] PMID: 19372587 [2] PMID: 12244095; PMID: 12244095; PMID: 12244…	Src activation further activated signal transducer and activator of transcription 3 (STAT 3) // T hese results support a model in w hich Src family kinases recruit STAT 3 through an SH3-dependent mechanism, resulting in transient kinase activation and STAT 3 phosphorylation.; Src activation further activated signal transducer and activator of transcription 3 (STAT 3) // T hese results support a m…	VALIDATED
60	SRC	SRC	P12931	Diabetic Macular Edema		Diabetic Macular Edema	1
61	CCL2	CCL2	P13500	Diabetic Macular Edema		Diabetic Macular Edema	1
62	HGF	Not represented	P14210	Diabetic Macular Edema		Diabetic Macular Edema	1
63	MMP9	Not represented	P14780	Diabetic Macular Edema		Diabetic Macular Edema	1
64	ETS1	ETS1	P14921	ANGPT2	ANGPT2	O15123	1	PMID: 15284088	The Ets family transcription factors Ets-1 and Elf-1 act as strong enhancers of endothelial cell Ang-2-promoter activity.	VALIDATED
65	ETS1	ETS1	P14921	MMP1	MMP1	P03956	1	PMID: 21244711	We found that MMP1 mRNA abundance was bimodally distributed in un-treated HUVECs and showed a bimodal response to inflammatory mediator treatment. RT-PCR and MMP1 activity assays confirmed the bimodal regulation and DNA sequencing of 69 individuals identified an MMP1 gene promoter polymorphism that segregated precisely with the MMP1 bimodal expression. Chromatin immunoprecipitation (ChIP) experim…	VALIDATED
66	ETS2	ETS1	P15036	ICAM1	ICAM1	P05362	1	PMID: 18958307	Our findings suggest that ETS-1 and ETS-2 are upregulated in ocular tumors derived from the retinal epithelium and may be involved in one or several signaling pathways that activate the expression of a set of genes involved in ocular tumor progression such as those encoding ICAM-1	VALIDATED
67	ATF2	AP-1	P15336	TNF	TNF	P01375	1	PMID: 27821620	We also show that ATF2 is involved in TNF responsiveness	VALIDATED
68	VEGFA	Not represented	P15692	Diabetic Macular Edema		Diabetic Macular Edema	1
69	CREB1	Not represented	P16220	IL6	IL6	P05231	1	[1]PMID: 19921094 [2]PMID: 20100571	[1]These findings suggest that CREB is implicated in IL-6 production from synovial cells and plays an important role in RA pathogenesis. [2]Cooperation of NFkappaB and CREB to Induce Synergistic IL-6 Expression in Astrocytes	VALIDATED
70	CREB1	Not represented	P16220	BCL2	Not represented	P10415	1	[1]PMID: 15647742 [2]PMID: 8816467	[1] bcl-2 contains a cyclic AMP-responsive element (CRE) located between 1640 and 1529, which controls bcl-2 levels via the activation of a transcription factor, CRE-binding protein (CREB) [2] We show by antibody supershift experiments and UV cross-linking followed by denaturing polyacrylamide gel electrophoresis that both CREB and ATF family members bind to this region in vitro. Mutations of the…	VALIDATED
71	PLCG2	Not represented	P16885	VCAM1	VCAM1	P19320	1	[1] KEGG: hsa04650; [2] PMID: 11108718	[1] Natural killer cell mediated cytotoxicity [2] NF-κB was activated through activation of PLCγ-sphingosine kinase-PKC cascade. This cascade is the main pathway that induces the transcription of ICAM-1, VCAM-1, and E-selectin. [...] Our results show that VEGF-stimulated expression of ICAM-1, VCAM-1, and E-selectin mRNAs was mainly through activation of PLCγ and NF-κB.	VALIDATED
72	PLCG2	Not represented	P16885	Diabetic Macular Edema		Diabetic Macular Edema	1
73	VEGFR1	VEGFR1	P17948	PIK3CD	PI3K	O00329	1	PMID: 18079407 PMID: 12814952; PMID: 18079407 PMID: 12814952; PMID: 26693066; PMID: 26693066	VEGFR-1-mediated chemotaxis of monocytes is dependent on the activation of PI-3K (protein B), p38 kinase, Akt, and ERK1/2. // Activation of PI3 kinase by VEGFR-2 regulates endothelial cell proliferation; VEGFR-1-mediated chemotaxis of monocytes is dependent on the activation of PI-3K (protein B), p38 kinase, Akt, and ERK1/2. // Activation of PI3 kinase by VEGFR-2 regulates endothelial cell prolif…	VALIDATED
74	VEGFR1	VEGFR1	P17948	TNF	TNF	P01375	1	PMID: 33640465	VEGFR1 signaling through VEGF-A and/or PlGF, via a variety of different pathways, contributing to numerous pathologic processes in endothelial cells and pericytes in the choroid and retina: (…) influx of pro-inflammatory cytokines e.g. tumor necrosis factor-α and interleukin-6 into surrounding tissue, increased angiogenic sprouts and neoangiogenesis [...] PlGF-induced VEGFR1 activation increased …	VALIDATED
75	VEGFR1	VEGFR1	P17948	IL6	IL6	P05231	1	PMID: 33640465	VEGFR1 signaling through VEGF-A and/or PlGF, via a variety of different pathways, contributing to numerous pathologic processes in endothelial cells and pericytes in the choroid and retina: (…) influx of pro-inflammatory cytokines e.g. tumor necrosis factor-α and interleukin-6 into surrounding tissue, increased angiogenic sprouts and neoangiogenesis [...] PlGF-induced VEGFR1 activation increased …	VALIDATED
76	VEGFR1	VEGFR1	P17948	SRC	SRC	P12931	1	PMID: 29263797	Together with our result that VEGFR1 is structured to preferentially activate PLCγ and PI3K, we predict that PLCγ and PI3K mediate VEGFR1 cell responses through coordinated activation involving Src.	VALIDATED
77	VEGFR1	VEGFR1	P17948	PLCG2	Not represented	P16885	1	PMID: 29263797	Here we introduce a computational approach that accurately predicts cellular responses elicited via VEGFR1 signaling. Aligned with our model prediction, we show empirically that VEGFR1 promotes macrophage migration through PLCγ and PI3K pathways and promotes macrophage proliferation through a PLCγ pathway.	VALIDATED
78	VEGFR1	VEGFR1	P17948	PLCG1	Not represented	P19174	1	PMID: 9398617	Vascular endothelial cell growth factor interacts with the receptor tyrosine kinases Flt-1 and KDR/Flk-1. We report that both receptors bind to PLC gamma and display specificity for the N-SH2 over the C-SH2 domain. Extensive site-directed mutagenesis of Flt-1 reveals that the juxta-membrane Y794, and the carboxyl terminal Y1169, are two major sites of interaction. Amino acids in the +1, +2 and +3…	VALIDATED
79	VEGFR1	VEGFR1	P17948	MK03	MEK/ERK	P27361	1	PMID: 33640465	VEGFR1 and VEGFR2 activation induce signaling pathways that are normally activated by TK receptors (Fig. 1b), such as extracellular signal-regulated kinase (ERK)/mitogen-activated protein kinase (MAPK), phosphoinositide 3-kinase (PI3K)/Akt, and p38	VALIDATED
80	VEGFR1	VEGFR1	P17948	PIK3CA	PI3K	P42336	1	Genomic Applications in Pathology p:346 https://books.google.es/books?id=wZWLBAAAQBAJ&pg=PA346&lpg=PA346&dq=vegfr+and+pik3ca&source=bl&ots=RpDdFi26su&sig=gdUV-BKiN9NZ1WjTeX2bzXnhWFA&hl=es&sa=X&ved=0CHMQ6AEwCWoVChMItp2UnfnuxgIVoalyCh0yEgrK#v=onepage&q=veg; Genomic Applications in Pathology p:346 https://books.google.es/books?id=wZWLBAAAQBAJ&pg=PA346&lpg=PA346&dq=vegfr+and+pik3ca&source=bl&ots=RpDd…	We found that F56 inhibited VEGF-induced phosphorylation of VEGFR1, as well as the phosphorylation of the downstream of PI3K-AKT axis; We found that F56 inhibited VEGF-induced phosphorylation of VEGFR1, as well as the phosphorylation of the downstream of PI3K-AKT axis; pik3a is downstream of receptor tyrosine kinases such as EGFR, Met and vascular endothelial growth factor receptor (VEGFR)// It i…	VALIDATED
81	VEGFR1	VEGFR1	P17948	PIK3CG	PI3K	P48736	1	PMID: 33640465	VEGFR1 and VEGFR2 activation induce signaling pathways that are normally activated by TK receptors (Fig. 1b), such as extracellular signal-regulated kinase (ERK)/mitogen-activated protein kinase (MAPK), phosphoinositide 3-kinase (PI3K)/Akt, and p38	VALIDATED
82	VEGFR1	VEGFR1	P17948	SHC2	Not represented	P98077	1	PMID: 9790910	As Sck contains the SH2 domain and PTB domain, we tested whether they bind to KDR and Flt-1. The SH2 domain of Sck binds to both of them. […] These results indicate that Sck binds to KDR and Flt-1 via its SH2 domain and might play an important role in VEGF signal transduction.	VALIDATED
83	VEGFR1	VEGFR1	P17948	PTK2	Not represented	Q05397	1	https://www.phosphosite.org/proteinAction.action?id=1140&showAllSites=true	Promotes phosphorylation of PTK2/PTK2.	VALIDATED
84	VEGFR1	VEGFR1	P17948	Diabetic Macular Edema		Diabetic Macular Edema	1
85	VEGFR1	VEGFR1	P17948	PIK3R1	PI3K	P27986	1	PMID: 26693066	We found that F56 inhibited VEGF-induced phosphorylation of VEGFR1, as well as the phosphorylation of the downstream of PI3K-AKT axis	VALIDATED
85	VEGFR1	VEGFR1	P17948	PIK3R2	PI3K	O00459	1	PMID: 26693066	We found that F56 inhibited VEGF-induced phosphorylation of VEGFR1, as well as the phosphorylation of the downstream of PI3K-AKT axis	VALIDATED
85	VEGFR1	VEGFR1	P17948	PIK3CB	PI3K	P42338	1	PMID: 18079407 PMID: 12814952; PMID: 18079407 PMID: 12814952; PMID: 26693066; PMID: 26693066	VEGFR-1-mediated chemotaxis of monocytes is dependent on the activation of PI-3K (protein B), p38 kinase, Akt, and ERK1/2. // Activation of PI3 kinase by VEGFR-2 regulates endothelial cell proliferation; VEGFR-1-mediated chemotaxis of monocytes is dependent on the activation of PI-3K (protein B), p38 kinase, Akt, and ERK1/2. // Activation of PI3 kinase by VEGFR-2 regulates endothelial cell prolif…	VALIDATED
86	EGR1	EGR1	P18146	PDGFB	PDGFB	P01127	1	PMID: 8596917	These findings implicate Egr-1 in the up-regulated expression of PDGF-B and other potent mediators in mechanically injured arterial endothelial cells.	VALIDATED
87	EGR1	EGR1	P18146	TNF	TNF	P01375	1	PMID: 10913190 // PMID: 31611276; PMID: 12560487	In LPS-stimulated macrophages [...] The transcription factors ATF-2, c-jun, Egr-1, and Sp1 are also inducibly recruited to the TNF-alpha promoter in vivo, and the binding sites for each of these activators are required for LPS-stimulated TNF-alpha gene expression. // Egr-1-deficient mice displayed decreased mortality, reduced levels of proinflammatory cytokines (tumor necrosis factor [TNF], inter…	VALIDATED
88	EGR1	EGR1	P18146	FN1	FN1	P02751	1	PMID: 10783396	The transcription factor EGR-1 directly transactivates the fibronectin gene and enhances attachment of human glioblastoma cell line U251	VALIDATED
89	EGR1	EGR1	P18146	FGF2	FGF2	P09038	1	PMID: 8702507	Egr-1 activates basic fibroblast growth factor transcription	VALIDATED
90	EGR1	EGR1	P18146	CXCL8	CXCL8	P10145	1	PMID: 19837667 // PMID: 15517885	Conversely, enforced expression of EGR-1 in EGR-1-lacking PC3 prostate cancer cells markedly enhanced IL-8 transcription and secretion. By using wild type and a series of mutant IL-8 promoter luciferase constructs, we found that the NF-kappaB binding site is important for EGR-1 regulation of IL-8. Furthermore, silencing EGR-1 suppressed a synergistically functional interaction between EGR-1 and N…	VALIDATED
91	EGR1	EGR1	P18146	HIF1A	HIF1A	Q16665	1	PMID: 18506761	The transcription factor Egr1 regulates the HIF-1alpha gene during hypoxia. [...] To elucidate the mechanism of the transcriptional upregulation of the HIF-1alpha gene, we have shown that Egr1 is able to directly bind to the HIF-1alpha promoter using chromatin immunoprecipitation. We also provide evidence that the binding of Egr1 is necessary for the trans-activation of the HIF-1alpha promoter. T…	VALIDATED
92	PLCG1	Not represented	P19174	Diabetic Macular Edema		Diabetic Macular Edema	1
93	VCAM1	VCAM1	P19320	Diabetic Macular Edema		Diabetic Macular Edema	1
94	TNR1A	Not represented	P19438	NFKB1	NFKB	P19838	1	PMID: 24958609	Ligation of TNFR1 by soluble TNF (Figure 2) induces activation of multiple signaling pathways, including NF-κB and MAPK,	VALIDATED
95	TNR1A	Not represented	P19438	NOS2	NOS2	P35228	1	PMID: 18369152	When LRP-1 is absent, cell-surface TNFR1 is increased, IκB is decreased, and NF-κB activity is increased […] Increased expression of inflammatory mediators, including C1r, C1s, iNOS, and IL-6, occurs downstream of TNFR1 when LRP-1 is deficient or silenced	VALIDATED
96	TNR1A	Not represented	P19438	PRKCI	aPKC	P41743	1	PMID: 11258478	The modulation of aPKC function by different protein complexes. (A) In response to TNFα receptor stimulation, the death domain (DD) of the corresponding receptor binds the adapter TRADD, which serves to recruit RIP. The coiled-coil (CC) region of RIP interacts with the atypical zinc finger (ZZ) of p62. The AID sequence of p62 interacts with the V1 domain of the aPKCs and serves to recruit them to…	VALIDATED
97	TNR1A	Not represented	P19438	PRKCZ	aPKC	Q05513	1	PMID: 11258478	The modulation of aPKC function by different protein complexes. (A) In response to TNFα receptor stimulation, the death domain (DD) of the corresponding receptor binds the adapter TRADD, which serves to recruit RIP. The coiled-coil (CC) region of RIP interacts with the atypical zinc finger (ZZ) of p62. The AID sequence of p62 interacts with the V1 domain of the aPKCs and serves to recruit them to…	VALIDATED
98	NFKB1	NFKB	P19838	CLD5	Not represented	O00501	-1	PMID: 30220553	TNF-α decreases mRNA levels of claudin-5 and zonula occludens protein 1 through an NF-κB–dependent mechanism. […] TNF-α activates PKCζ through as yet unknown mechanisms, which activates NF-κB signaling. NF-κB represses transcription of tight junction components claudin-5 and zonula occludens protein 1 (ZO-1), compromising endothelial tight junctions and facilitating BRB breakdown.	VALIDATED
99	NFKB1	NFKB	P19838	TNF	TNF	P01375	1	PMID: 15064395; PMID: 15064395//; PMID: 15064395 // PMID: 15064395// PMID: 10551799; PMID: 15064395; PMID: 15064395//; PMID: 15064395 // PMID: 15064395// PMID: 10551799; PMID: 15064395; PMID: 15064395//; PMID: 15064395 // PMID: 15064395// PMID: 10551799; PMID: 15064395; PMID: 15064395//; PMID: 15064395 // PMID: 15064395// PMID: 10551799; PMID: 15064395; PMID: 15064395//; PMID: 15064395 // PMID: 1…	We found that adenovirus-mediated overexpression of I¿Ba or IKK-2dn, inhibitors of the canonical pathway of NF-¿B induction, significantly reduced NF-¿B DNA-binding activity in the nucleus of cells from atherosclerotic plaques. This finding was accompanied by reduced production of prothrombotic and proinflammatory mediators, namely TF, TNF, IL-6, IL-8, MMP-1, MMP-3, and MMP-9. ; We found that ade…	VALIDATED
100	NFKB1	NFKB	P19838	FN1	FN1	P02751	1	PMID: 12372417	These results show that NF-kappaB activates FN gene expression by binding to the responsive element at -1180 as the p65/p65 homodimer in rat hepatocytes.	VALIDATED
101	NFKB1	NFKB	P19838	MMP1	MMP1	P03956	1	PMID: 16468044	Inhibitors of ERK and NFκB could significantly block the induction of MMP-1 and -13 (p<0.05) and the repression of collagen type II (p<0.01). The inhibitor for p38 MAPK was able to block partially MMP-1 and -13 up-regulation (p<0.01), but did not significantly inhibit collagen type II repression. Our data suggest that ERK and NFkB pathways are particularly important for IL-1β regulating collagen …	VALIDATED
102	NFKB1	NFKB	P19838	IL6	IL6	P05231	1	PMID: 22053092; PMID: 22053092//; PMID: 22053092; PMID: 22053092//	The inhibition of NFKB resulted in reduced IL1B, IL6, and CXCL8 mRNA expression in both cell types; The inhibition of NFKB resulted in reduced IL1B, IL6, and CXCL8 mRNA expression in both cell types//This TLR4 and MYD88 signaling results in the activation of downstream kinases, leading to the degradation of IKB, which frees NFKB to translocate to the nucleus, where it binds ¿B sites in the promot…	VALIDATED
103	NFKB1	NFKB	P19838	ICAM1	ICAM1	P05362	1	[1] PMID: 15661756 [2] PMID: 9654343	[1] Expression analysis of genes known to be regulated by NFkB revealed that Intercellular adhesion molecule 1 (Icam1) […] [2] When HBMEC were subjected to hypoxia followed by reoxygenation but not hypoxia alone, an NF-κB complex composed of p65 and p50 Rel proteins was rapidly activated within 15–30 min. Four hours later, expression of the ICAM-1 gene was significantly upregulated. The antioxida…	VALIDATED
104	NFKB1	NFKB	P19838	MMP2	Not represented	P08253	1	PMID: 12406554	NF-kB is involved in the regulation of expression of MMP9 and uPA (urokinase plasminogen activator), as well as integrin aV, which enables metastasis by localizing MMP2 to the invasive surface of the cancer cells	VALIDATED
105	NFKB1	NFKB	P19838	CXCL8	CXCL8	P10145	1	PMID: 20600865 // PMID: 15064395	We show that Mg deficiency activates NFkB and this event associates with the overexpression of the chemokines IL-8 and RANTES. // We found that adenovirus-mediated overexpression of I¿Ba or IKK-2dn, inhibitors of the canonical pathway of NF-¿B induction, significantly reduced NF-¿B DNA-binding activity in the nucleus of cells from atherosclerotic plaques. This finding was accompanied by reduced p…	VALIDATED
106	NFKB1	NFKB	P19838	BCL2	Not represented	P10415	1	PMID: 14663476; PMID: 14663476 // KEGG: hsa - 04064 ; PMID: 14663476 // KEGG: hsa - 04064 //PMID: 14663476//	In addition to promoting expression of proinflammatory cytokines, NOD-mediated activation of NF-kappaB was shown in one instance to also promote transcription of antiapoptotic genes, as demonstrated by activation of the prosurvival Bcl-2 family member B; In addition to promoting expression of proinflammatory cytokines, NOD-mediated activation of NF-kappaB was shown in one instance to also promote…	VALIDATED
107	NFKB1	NFKB	P19838	CCL2	CCL2	P13500	1	PMID: 11512674 // PMID: 16206198 // PMID: 16764699 //	[CCL2 = MCP1] Upregulation of chemokine synthesis was preceded by an increase in NF-kappaB and AP-1 DNA-binding activity, suggesting that these transcription factors are activated to increase MCP-1 and IL-8 expression by HA fragments. // Electromobility shift assays (EMSAs) demonstrated increased nuclear NF-kappaB levels within 2 h of initiating astrocyte differentiation, and inhibitors of NF-kap…	VALIDATED
108	NFKB1	NFKB	P19838	VEGFA	Not represented	P15692	1	PMID: 22174951; PMID: 22174951	The present study demonstrates for the first time that hypertrophic mechanical stretch promotes VEGF secretion through the NFkB signal transduction pathway in adult rat cardiomyocytes. Blocking NFkB activation abrogates VEGF secretion induced by cyclic mechanical stretch in these cells. [...] Hypoxia-induced stress also promotes NFkB-mediated VEGF secretion in human mesenchymal stem cells	VALIDATED
109	NFKB1	NFKB	P19838	VCAM1	VCAM1	P19320	1	[1] 15265939 [2] PMID: 10820282 [3] PMID: 11735124	[1] the VCAM-1 promoter has binding sites for NF-¿B, AP-1, SP-1, IRF-1, and GATA [2] NF-kappa B mediates TNF-alpha-induced VCAM-1 expression on mFLS. [3] NF-kappaB activation is the underlying molecular mechanism for constitutive expression of E-selectin, VCAM-1, and ICAM-1 on human B lymphocytes and plasma cells.	VALIDATED
110	NFKB1	NFKB	P19838	NOS2	NOS2	P35228	1	PMID: 12595462	Based on experiments with iNOS promoter-luciferase reporter constructs with site-directed mutagenesis of either one or both of the NF-¿B-binding sites, both sites were equal requisites for induction of iNOS by IFN-¿ plus ManLAM. induction of iNOS and NO· in murine macrophages is dependent on the IKK-NF-¿B signaling pathway (...) NF-¿B has been shown to activate genes that may either enhance (e.g.…	VALIDATED
111	NFKB1	NFKB	P19838	CXCR4	CXCR4	P61073	1	PMID: 12690099	NF-kappaB regulates the motility of breast cancer cells by directly up-regulating the expression of CXCR4.	VALIDATED
112	NFKB1	NFKB	P19838	NFKB2	NFKB	Q00653	1	PubMed ID: 19524538	The Nfkb1 and Nfkb2 proteins, p105 and p100, have dual functions in the NF-􀁊􀁊B signaling system. They are best known as precursors of p50 and p52	VALIDATED
113	NFKB1	NFKB	P19838	TJP1	TJP1	Q07157	-1	PMID: 30220553	TNF-α decreases mRNA levels of claudin-5 and zonula occludens protein 1 through an NF-κB–dependent mechanism. […] TNF-α activates PKCζ through as yet unknown mechanisms, which activates NF-κB signaling. NF-κB represses transcription of tight junction components claudin-5 and zonula occludens protein 1 (ZO-1), compromising endothelial tight junctions and facilitating BRB breakdown.	VALIDATED
114	NFKB1	NFKB	P19838	ROBO4	ROBO4	Q8WZ75	1	PMID: 31160487	TNFα increased Robo4 expression in mice and human primary ECs by activating NF-kB	VALIDATED
115	NFKB1	NFKB	P19838	Diabetic Macular Edema		Diabetic Macular Edema	1
116	NFKB1	NFKB	P19838	CCL5	CCL5	P13501	1	PMID: 25098295	Within the murine CCL5 promoter, one NFkB and one IRF binding site are responsible for stimulation of the promoter by TNFα and INFγ and activation is regulated by the p65 subunit of NFkB and IRF1 respectively	VALIDATED
116	NFKB1	NFKB	P19838	IL1B	IL1B	P01584	1	PMID: 18285351 [1]PMID: 17612514; PMID: 18285351 [1]PMID: 17612514; PMID: 22053092; [1] PMID: 22053092 [2] PMID: 8021507; PMID: 22053092; [1] PMID: 22053092 [2] PMID: 8021507	Immunohistochemistry was performed to examine the expression of NF-kappaB, AP-1, and NF-kappaB regulatory proteins (IkappaB-alpha, p-IkappaB-alpha, and IKK-alpha proteins), as well as NF-kappaB and AP-1 downstream target proinflammatory molecules (ICAM-1, TNF-alpha, IL-1beta, IL-6, and GM-CSF) and NF-kappaB upstream signaling molecules (CD40 and CD40L). We observed extensive upregulation of activ…	VALIDATED
117	NFKB1	NFKB	P19838	CXCL10	CXCL10	P02778	1	PMID: 16982926 // PMID: 24701034 // PMID: 19479051	These findings suggest that, in CpG DNA-stimulated human pDC, the induction of IRF-7, CXCL10, and CCL3 is mediated by the NF-kappaB/p38 MAPK pathway // Through the downstream transcription factors of these pathways, NF-κB and IRF7, which bind directly to the CXCL10's promoter, the expression of CXCL10 is increased. // Furthermore, CXCL10 induction was found to be regulated transcriptionally by th…	VALIDATED
117	NFKB1	NFKB	P19838	LEG1	Not represented	P09382	1	PMID: 26648523 /// PMID: 21689853	Several transcription factors such as HIF-1? , nuclear factor-? B and activator protein-1 are known to regulate LGALS1/Galectin-1 gene expression21,31. Galectin-1 plays multifaceted roles in cell adhesion/proliferation, angiogenesis and immunosuppression, targeting not only a variety of cancer cells, but also vascular endothelial cells and regulatory T cells21,32. /// The present study suggest a …	VALIDATED
117	NFKB1	NFKB	P19838	SELE	SELE	P16581	1	[1] PMID: 9780008 [2] PMID: 8896391	[1] Since the promoter regions of ICAM-1, VCAM-1, and ELAM-1 contain NF-kB binding sites and these adhesion molecules are involved in the attachment of leukocytes to EC […]TNF induces the expression of NF-kBdependent genes such as intercellular adhesion molecule (ICAM)-1 (also called CD54), vascular cell adhesion molecule (VCAM-1), and endothelial leukocyte adhesion molecule (ELAM)-1 (also called…	VALIDATED
117	NFKB1	NFKB	P19838	TF65	Not represented	Q04206	1	DB: UniProtKB: NFKB1_HUMAN // PMID: 10498867 // PMID: 14690596	NF-kappa-B is a homo- or heterodimeric complex formed by the Rel-like domain-containing proteins RELA/p65, RELB, NFKB1/p105, NFKB1/p50, REL and NFKB2/p52 and the heterodimeric p65-p50 complex appears to be most abundant one. // The NF-kappaB is a heterodimer composed of p50 and p65. The p65 subunit is know n to be repsonsible for transcriptional activation. // Upon cytokine treatment, Pin1 binds …	VALIDATED
117	NFKB1	NFKB	P19838	VEGFB	Not represented	P49765	1	PMID: 23401656	Inhibition of the transcription factor NFkB diminished VEGF secretion. Constitutive VEGF secretion in the RPE/choroid seems to be regulated by the transcription factor NFkB	VALIDATED
118	MK03	MEK/ERK	P27361	FOS	AP-1	P01100	1	[1]PW:05200-Pathways in cancer [2]PMID: 16123044	[1] ERK induces the transcription of FOS [2] The activation of the activating protein-1 (AP-1) family of transcription factors, including c-Fos and c-Jun family members, is one of the earliest nuclear events induced by growth factors that stimulate extracellular signal-regulated kinases (ERKs)	VALIDATED
119	MK03	MEK/ERK	P27361	ESR1	Not represented	P03372	1	PMID: 18372406	Phosphorylation site mapping has demonstrated that serine 118 (S118) in AF-1 is phosphorylated by Erk1/2 MAPK, resulting in stimulation of ERα activity	VALIDATED
120	MK03	MEK/ERK	P27361	JUN	AP-1	P05412	1	24877090; 24877090//	The MAPK inhibitor U0126 blocked ERK1/2 activation and reduced Schwann cell proliferation as well as induction of c-Jun transcription. ; The MAPK inhibitor U0126 blocked ERK1/2 activation and reduced Schwann cell proliferation as well as induction of c-Jun transcription. //	VALIDATED
121	MK03	MEK/ERK	P27361	ETS1	ETS1	P14921	1	PMID: 11948414	Hepatocyte growth factor/scatter factor activates the ETS1 transcription factor by a RAS-RAF-MEK-ERK signaling pathway	VALIDATED
122	MK03	MEK/ERK	P27361	ETS2	Not represented	P15036	1	PMID: 15572696	Mitogen-activated protein kinase (MAPK) phosphorylation of Ets-1 and Ets-2, at a conserved site N terminal to their Pointed (PNT) domains, resulted in enhanced transactivation by preferential recruitment of the coactivators CREB binding protein (CBP) and p300.	VALIDATED
123	MK03	MEK/ERK	P27361	ATF2	AP-1	P15336	1	PMID: 12110590; PMID: 29950153	(ATF2=CREB) In addition, we found that low TGF-β1 concentrations significantly increased the level of CREB phosphorylation (an ERK1/2 downstream signaling molecule), and this increase was abrogated with MEK inhibition, similar to the effects on c-Ski expression. It has also been reported that ERK can regulate cell proliferation through its effects on CREB; the Raf–MEK–ERK pathway induces phosphor…	VALIDATED
124	MK03	MEK/ERK	P27361	CREB1	Not represented	P16220	1	PMID: 27770611	Inactivation of mitogen-activated protein kinase (MAPK3/1) by U0126 inhibited LH-induced CREB phosphorylation and EGF-like factors gene expression, whereas the activation of LH receptor increased Akt/protein kinase B phosphorylation, which is involved in LH-induced CREBphosphorylation and the expression of EGF-like factors. Thus, LH induces MAPK3/1 and Akt activation[...]	VALIDATED
125	MK03	MEK/ERK	P27361	EGR1	EGR1	P18146	1	[1] PMID: 25803847 [2] PMID: 24883066	[1] These results clearly indicate that Mapk3/1 activity is indispensable for LH-induced Egr1 expression in granulosa cells. [2] Activation of extracellular signal-regulated protein kinase-1 and kinase-2 (ERK1/2) signaling is known to upregulate Egr-1.	VALIDATED
126	MK03	MEK/ERK	P27361	NFKB1	NFKB	P19838	1	PMID: 1648088 //; [1] PMID: 21372320	MAP kinase cascade, a group of serine and threonine kinases that regulate gene expression by modulating transcription factors such as NF-kB (Liu et al., 2001). Three members of the MAPK family, ERK1/2, SAPK/JNK, and p38, are all activated early after focal cerebral ischemia, and inhibition of this pathway reduces the expression of proinflammatory cytokines and confers protection against the insul…	VALIDATED
127	MK03	MEK/ERK	P27361	STAT3	JAK/STAT	P40763	1	PMID: 11350938; PMID: 11350938; [1] PMID: 11350938 [2] PMID: 12763138; [1] PMID: 11350938 [2] PMID: 12763138; [1] PMID: 11350938; [2] PMID: 12763138; [3] PMID: 28174694	There is evidence that the ERK family of mitogen-activated protein MAP kinases, phosphorylate STAT3 at Ser727 in response to growth factors. / ERK mediated PDGF signaling cascade to STAT3; There is evidence that the ERK family of mitogen-activated protein MAP kinases, phosphorylate STAT3 at Ser727 in response to growth factors. / ERK mediated PDGF signaling cascade to STAT3; [1] There is evidence…	VALIDATED
128	MK03	MEK/ERK	P27361	STAT1	JAK/STAT	P42224	1	PMID: 27742579 // PMID: 23825585 // PMID: 20675591	STAT1 as a downstream mediator of ERK signaling contributes to bone cancer pain by regulating MHC II expression in spinal microglia. // MEK/ERK dependent activation of STAT1 mediates dasatinib-induced differentiation of acute myeloid leukemia. // ERK is integral to the IFN-¿-mediated activation of STAT1, the expression of key genes implicated in atherosclerosis, and the uptake of modified lipopro…	VALIDATED
129	MK03	MEK/ERK	P27361	GATA4	Not represented	P43694	1	PMID: 14729955	ERK1/2 signaling has been associated with phosphorylation and activation of the cardiac-enriched transcription factor GATA4, which itself serves as an important mediator of the hypertrophic growth response	VALIDATED
130	MK03	MEK/ERK	P27361	PTPN11	Not represented	Q06124	-1	PMID: 8197172	Using an in vitro kinase assay, we found that the 44-kDa mitogen-activated protein kinase, p44mapk [rat homolog of human Mitogen-activated protein kinase 3], phosphorylated PTP2C on serine and threonine residues. This phosphorylation resulted in a pronounced inhibition of PTP2C enzyme activity measured with phosphorylated EGF receptors as substrate. Moreover, in intact PC12 cells, PTP2C was also …	VALIDATED
131	MK03	MEK/ERK	P27361	HIF1A	HIF1A	Q16665	1	[1] PMID: 27909249 [2] PMID: 10551817	[1] Phosphorylation by ERK1 and/or ERK2 (MAPK3 and MAPK1, respectively; hereafter ERK) stimulates the transcriptional activity of HIF-1α by inhibiting its CRM1 (XPO1)-dependent nuclear export. [2] Active p42/p44 MAPK induced a rapid phosphorylation of HIF-1α, eitherin vitro translated or immunoprecipitated and dephosphorylated from HeLa cells. This phosphorylation increases HIF-1α's molecular mas…	VALIDATED
132	MK03	MEK/ERK	P27361	Diabetic Macular Edema		Diabetic Macular Edema	1
133	MK03	MEK/ERK	P27361	BCL2L11	Not represented	O43521	-1	PMID: 23532732	MAPK pathway activation leads to Bim loss and histone deacetylase inhibitor resistance: rationale to combine romidepsin with an MEK inhibitor	VALIDATED
133	MK03	MEK/ERK	P27361	BAD	Not represented	Q92934	-1	PMID: 11796750	To identify downstream effects of ERK1/2 that might regulate hypoxic neuronal death, we measured hypoxia‐induced phosphorylation of three ERK1/2 targets: the 90‐kDa ribosomal protein S6 kinase (RSK), the transcription factor ELK1, and the pro‐apoptotic Bcl‐2 family protein Bad. We observed increased abundance of inactivated (phospho‐)Bad, but no change in phospho‐RSK or phospho‐ELK1. Moreover, th…	VALIDATED
134	MK03	MEK/ERK	P27361	CREB3	Not represented	O43889	1	[1] Kegg: hsa04915 - Estrogen signaling pathway [2] PMID: 29950153	[1] Kegg: MK03 and MK01 (ERK1/2) activates CREB3 (pCREB) [2] For the first time, our study clearly shows that low TGF-β1 concentrations promote c-Ski expression via the ERK/CREB pathway, and we show that this effect differs from that of the classic Smad2/3 pathway. These data help clarify the bidirectional regulation of fibroblast proliferation by different doses of TGF-β1.	VALIDATED
134	MK03	MEK/ERK	P27361	MYC	Not represented	P01106	1	PMID: 11018017 // PMID: 16899113 // PMID: 17496918	c-Myc has previously been reported to be a downstream target of MEKs/ERKs. These data are in line with the notion that c-Myc is a downstream target of MEK/ERK pathway and suggest that aberrant growth of different tumor cell lines can be halted by targeting c-Myc following MEK/ERK inhibition // Our recent work has demonstrated a role for Ras-activated ERK kinases in mediating the stabilization of …	VALIDATED
134	MK03	MEK/ERK	P27361	SNAI2	Not represented	O43623	1	PMID: 17295233//PMID: 24108744	The related zinc finger transcription factors Slug and Snail modulate epithelial mesenchymal transformation (EMT). Growth factors, acting through mitogen-activated protein kinase (MAPK) cascades, regulate expression of Slug and Snail. We report here that ultraviolet radiation (UVR), which activates MAPK cascades, also stimulates Snail and Slug expression in epidermal keratinocytes.// MAPK3/1 sign…	VALIDATED
135	NOS3	NOS3	P29474	Diabetic Macular Edema		Diabetic Macular Edema	1
136	AKT2	AKT	P31751	BCL2	Not represented	P10415	1	PMID: 26276357 // PMID: 26067553	Gab1 regulates SDF-1-induced progression via inhibition of apoptosis pathway induced by PI3K/AKT/Bcl-2/BAX pathway in human chondrosarcoma. // RLIP76-dependent suppression of PI3K/AKT/Bcl-2 pathway by miR-101 induces apoptosis in prostate cancer.	VALIDATED
137	AKT2	AKT	P31751	NOS3	NOS3	P29474	1	PMID:20607729; https://doi.org/10.1161/01.CIR.0000129768.35536.FA	In hypertension, reduced nitric oxide production and blunted endothelial vasorelaxation are observed. It was recently reported that AKT phosphorylates and activates endothelial nitric oxide synthase and that impaired kinase activity may be involved in endothelial dysfunction.; NOS2 and ARG1 (human homologues) are also linked to AKT1 thorough NOS3; AKT1 is also linked, via NOS3 (eNOS), to ARG1 and…	VALIDATED
138	AKT2	AKT	P31751	NOS2	NOS3	P35228	1	PMID: 28067899	Taken together, these results strongly suggest that Akt activation mediates Nos2 induction in the dilated aortic wall.	VALIDATED
139	CTNNB1	CTNNB1	P35222	TJP1	TJP1	Q07157	-1	[1] PMID: 15094344 [2] PMID: 9990071	[1] ß-Catenin on its turn binds to a-catenin that recruits ZO-1. ZO-1 may be critically involved in regulation of gene expression. Moreover, overexpression of ß-catenin downregulates ZO-1 levels. In analogy with the permeability-unrelated effects at tight junctions, with ZO-1 at central stage, gap junctional ZO-1 is a candidate to regulate gene transcription via ß-catenin and ZONAB. [2] The expre…	VALIDATED
140	CTNNB1	CTNNB1	P35222	Diabetic Macular Edema		Diabetic Macular Edema	-1
141	NOS2	NOS2	P35228	Diabetic Macular Edema		Diabetic Macular Edema	1
142	PTGS2	Not represented	P35354	Diabetic Macular Edema		Diabetic Macular Edema	1
143	STAT3	JAK/STAT	P40763	TGFB1	TGFB1	P01137	1	PMID: 16606674; PMID: 25740948 // PMID: 28828629 // PMID: 29752408; [1] PMID: 24573038 [2] PMID: 28154170; [1] PMID: 25740948 [2] PMID: 24573038 [3] PMID: 28154170/[1] PMID: 24573038 [2] PMID: 28154170	The activated STAT3 enhanced TGF-beta1 and IL-10 expression in T cells, whereas the dominant-negative form of STAT3 suppressed these.; The clinical significance of these findings is that abnormal STAT3 activation is unique to the strictured intestinal muscle in patients with Montreal B2 CD and can be restored to normal levels by selective inhibition of STAT3(S727) activation. This approach could …	VALIDATED
144	STAT3	JAK/STAT	P40763	IL6	IL6	P05231	1	PMID: 25234193 // PMID: 25277211; PMID: 24097101 // PMID: 16670765; PMID: 25234193 // PMID: 25277211; PMID: 25234193 // PMID: 25277211; PMID: 24097101 // PMID: 16670765; PMID: 25234193 // PMID: 25277211; PMID: 25234193 // PMID: 25277211; PMID: 24097101 // PMID: 16670765; PMID: 25234193 // PMID: 25277211; [1] PMID: 25234193 [2] PMID: 24525913; [1] PMID: 25234193 [2] PMID: 24525913 // PMID: 2265278…	Additionally, signal transducer and activator of transcription 3 (STAT 3) w as also involved in the IL-1¿¿-induced IL-6 expression in gastric cancer cells. Piperine inhibited IL-1¿¿-induced p38 MAPK and STAT 3 activation and, in turn, blocked the IL-1¿¿- induced IL-6 expression. Furthermore, gastric cancer cells pretreated w ith IL-1¿¿ show ed markedly enhanced invasiveness, which w as partially …	VALIDATED
145	STAT3	JAK/STAT	P40763	FGF2	FGF2	P09038	1	PMID: 25048528; [1] PMID: 25048528 [2] PMID: 21333372	Our results suggest that bFGF can induce the activation of STAT3 mainly through the JAK and PI3K/Akt pathways, and that siRNA-mediated knockdown of STAT3 markedly reduces the bFGF levels in U251 cells. ; [1] Our results suggest that bFGF can induce the activation of STAT3 mainly through the JAK and PI3K/Akt pathways, and that siRNA-mediated knockdown of STAT3 markedly reduces the bFGF levels in U…	VALIDATED
146	STAT3	JAK/STAT	P40763	CXCL8	CXCL8	P10145	1	PMID: 24525913; PMID: 24525913 // PMID: 23125416; PMID: 24525913 // PMID: 24525913 // PMID: 23125416	In this study, we examine the role of STAT3 in mediating key pro-inflammatory pathways involved in the pathogenesis of RA. (…)Finally, using RA synovial tissue explants ex vivo, STAT3 blockade significantly inhibited IL-6, IL-8, MMP3 and Notch-1 receptor mRNA in contrast with IL-10 which was significantly induced.; In this study, we examine the role of STAT3 in mediating key pro-inflammatory path…	VALIDATED
147	STAT3	JAK/STAT	P40763	CCL2	CCL2	P13500	1	PMID: 25318604	IL-6 and CCL2 induced each other and cooperatively elicited STAT3 phosphorylation; conversely, STAT3 regulated the production of IL-6 and CCL2, thus constituting a positive feedback loop to maintain and amplify STAT3 signaling, consequently promoting additional EMT events.	VALIDATED
148	STAT3	JAK/STAT	P40763	HGF	Not represented	P14210	1	PMID: 21595927	Stat3 regulated genes include cyclin D1 [7] and c-myc [8], which are involved in cell proliferation; Bcl-XL [9], survivin [10], and Bcl-2 [11], which mediate apoptosis; several matrix metalloproteases involved in invasion [12-14]; and growth factors and cytokines such as VEGF [15] and HGF [16]. (...) c-met is often constitutively active in human tumors [36-38], and HGF/c-met signaling is at least…	VALIDATED
149	STAT3	JAK/STAT	P40763	VEGFA	Not represented	P15692	1	PMID: 15735682; PMID: 15735682 // PMID: 19185840 // PMID: 11960372; PMID: 15735682; PMID: 15735682 // PMID: 19185840 // PMID: 11960372; PMID: 15735682; PMID: 15735682 // PMID: 19185840 // PMID: 11960372; PMID: 15735682; PMID: 15735682 // PMID: 19185840 // PMID: 11960372; PMID: 15735682; PMID: 15735682 // PMID: 19185840 // PMID: 11960372; PMID: 15735682; PMID: 15735682 // PMID: 19185840 // PMID: 1…	These data suggest that the binding of both STAT3 and HIF-1alpha to the VEGF promoter is required for maximum transcription of VEGF mRNA following hypoxia; These data suggest that the binding of both STAT3 and HIF-1alpha to the VEGF promoter is required for maximum transcription of VEGF mRNA following hypoxia // STAT3 activation favors proliferation of malignant cells by exerting an antiapoptotic…	VALIDATED
150	STAT3	JAK/STAT	P40763	PTGS2	Not represented	P35354	1	PMID: 24127267	Here, we report that H. pylori rapidly triggers STAT3 signaling and induces STAT3-dependent COX-2 expression both in vitro and in vivo. STAT3 upregulates COX-2 by binding to and increasing the activity of COX-2 promoter. (**COX-2= PTGS2**)	VALIDATED
151	STAT3	JAK/STAT	P40763	HIF1A	HIF1A	Q16665	1	[1] PMID: 18985005	[1] Taken together, our results suggest that STAT3 decreases the pVHL-mediated ubiquitination of HIF-1alpha through competition with pVHL for binding to HIF-1 alpha, and then stabilizes HIF-1alpha protein levels	VALIDATED
152	PRKCI	aPKC	P41743	Diabetic Macular Edema		Diabetic Macular Edema	1
153	STAT1	JAK/STAT	P42224	ICAM1	ICAM1	P05362	1	PMID: 9353323	A subset of epithelial immune-response genes (including intercellular adhesion molecule-1 (ICAM-1)) depends on an IFN- signal transduction pathway with the Stat1 transcription factor as a critical intermediate; A subset of epithelial immune-response genes (including intercellular adhesion molecule-1 (ICAM-1)) depends on an IFN-γ signal transduction pathway with the Stat1 transcription factor as a…	VALIDATED
154	STAT1	JAK/STAT	P42224	CCL2	CCL2	P13500	1	PMID: 17255531; PMID: 17255531//; PMID: 17255531; PMID: 17255531//; PMID: 17255531; PMID: 17255531//; PMID: 17255531; PMID: 17255531//	The IFN-gamma-induced activity of the MCP-1 (CCL2) gene promoter and an artificial promoter containing STAT1 responsive elements was inhibited by expression of dominant negative forms of JAK-1 and -2, STAT1, CK2, and AKT. The action of CK2 and AKT on STAT1 activation was mediated, at least in part, through the regulation of serine 727 phosphorylation. Analysis of a number of other genes regulated…	VALIDATED
155	STAT1	JAK/STAT	P42224	NOS2	NOS2	P35228	1	PMID: 17251186; PMID: 17251186 // PMID: 26677135; PMID:16140971	Silencing of STAT1, a major transcription factor involved in signaling by IFNgamma, or pharmacological inhibition of JAKs, kinases that phosphorylate STATs, prevented the induction of iNOS and the production of NO; Silencing of STAT1, a major transcription factor involved in signaling by IFNgamma, or pharmacological inhibition of JAKs, kinases that phosphorylate STATs, prevented the induction of …	VALIDATED
156	STAT1	JAK/STAT	P42224	CCL5	CCL5	P13501	1	PMID: 20523058	Cooperative activation of CCL5 expression by TLR3 and tumor necrosis factor-alpha or interferon-gamma through nuclear factor-kappaB or STAT-1 in airway epithelial cells. […] Cross-talk between TLR3 signaling and inflammatory cytokines regulates the expression of CCL5 in airway epithelial cells. In this mechanism, TNF-alpha may activate NF-kappaB, in cooperation with TLR3 signaling. IFN-gamma may …	VALIDATED
156	STAT1	JAK/STAT	P42224	IL1B	IL1B	P01584	1	PMID: 16670765 // PMID: 17032168; PMID: 16670765 // PMID: 17032168; PMID: 17032168; PMID: 17032168 // PMID: 17386941; PMID: 17032168; PMID: 17032168 // PMID: 17386941	Despite the presence of IL-1beta mRNA, IL-1beta protein was markedly reduced in the absence of Stat1 activation in macrophages derived from IFN-beta (/) and Stat1(/) mice or in the absence of caspase-1 activity, which itself was dependent on Stat1 activation. These studies support the hypothesis that the expression of IL-1beta requires both the MyD88-dependent induction of IL-1beta mRNA and pro-I…	VALIDATED
157	PIK3CA	PI3K	P42336	RAF1	Not represented	P04049	1	[1] PMID: 21964438 [2] PMID: 10801448	[1] At the same time, PI3K may also crosstalk with Raf-1, in which the prosurvival signal of PI3K maintains the expression of Raf-1. [2] Thus, phosphorylation of Raf1 Ser338 through PI 3-kinase and Pak provides a co-stimulatory signal which together with Ras leads to strong activation of Raf1 kinase activity by integrins.	VALIDATED
158	PIK3CA	PI3K	P42336	SRC	SRC	P12931	1	PMID: 27169346	The protein kinase activity of PI3K phosphorylates serine residue 70 on Src to enhance its activity	VALIDATED
159	PIK3CA	PI3K	P42336	PLCG2	Not represented	P16885	1	Kegg: hsa04664-Fc epsilon RI signaling pathway //PMID: 19017959; Kegg: hsa04664-Fc epsilon RI signaling pathway //PMID: 19017959//; Kegg: hsa04664-Fc epsilon RI signaling pathway //PMID: 19017959//Kegg: hsa04664-Fc epsilon RI signaling pathway //PMID: 19017959////; Kegg: hsa04664-Fc epsilon RI signaling pathway //PMID: 19017959//Kegg: hsa04664-Fc epsilon RI signaling pathway //PMID: 19017959////K…	We and others have shown that Btk enhances Fc¿RI-mediated PLC¿1 activation in a PI3K-dependent manner. […] This conclusion is supported by the fact that phosphorylation of Btk, PLC¿1 and PLC¿2 was reduced following treatment of wild type BMMCs with the PI3K inhibitors; We and others have shown that Btk enhances Fc¿RI-mediated PLC¿1 activation in a PI3K-dependent manner. […] This conclusion is sup…	VALIDATED
160	PIK3CA	PI3K	P42336	AKT2	AKT	P31751	1	[1]PMID: 18473732 [2]KEGG: hsa04380 - Osteoclast differentiation; [1]PMID: 18473732 [2]KEGG: hsa04380 - Osteoclast differentiation [3] PMID: 20584748 [4] PMID: 23576023; [1]PMID: 18473732 [2]KEGG: hsa04380 - Osteoclast differentiation; [1]PMID: 18473732 [2]KEGG: hsa04380 - Osteoclast differentiation [3] PMID: 20584748 [4] PMID: 23576023	PTEN/PI3K/AKT constitutes an important pathway regulating the signaling of multiple biological processes such as apoptosis, metabolism, cell proliferation and cell growth. PTEN is a dual protein/lipid phosphatase which main substrate is the phosphatidyl-inositol,3,4,5 triphosphate (PIP3), the product of PI3K. Increase in PIP3 recruits AKT to the membrane where it is activated by other kinases als…	VALIDATED
161	PIK3CA	PI3K	P42336	PRKCZ	aPKC	Q05513	1	DOI 10.1074/jbc.M508810200	The mechanism of PI3K activation of PKC involves PDK1, a kinase known to phosphorylate PKC	VALIDATED
162	PIK3CA	PI3K	P42336	AKT1	AKT	P31749	1	PMID: 12933816; PMID: 12933816; Uniprot: P42336; [1] PMID: 20584748 [2] PMID: 23576023 [3] PMID: 12933816; kegg: hsa04012 [4] hsa04151; Uniprot: P42336; [1] PMID: 20584748 [2] PMID: 23576023 [3] PMID: 12933816; kegg: hsa04012 [4] hsa04151	Androgen activates phosphatidylinositol 3-kinase (PI3K) and Akt, including AKT1 and AKT2, in AR-positive cells. AR interacts with the p85 regulatory subunit of PI3K, and its binding affinity is increased after androgen stimulation. Activation of PI3K/Akt by androgen was inhibited by dominant-negative Src. . These findings indicate that a triple complex between AR, p85 , and Src is required for an…	VALIDATED
162	PIK3CA	PI3K	P42336	AKT3	AKT	Q9Y243	1	[1] PMID: 18473732 [2] PMID: 23378641 [3] PMID: 20584748 [4] PMID: 23576023; [1] PMID: 18473732 [2] PMID: 23378641 [3] PMID: 20584748 [4] PMID: 23576023; [1] PMID: 18473732 [2] PMID: 23378641//; [1] PMID: 18473732 [2] PMID: 23378641//	[1] PTEN/PI3K/AKT constitutes an important pathway regulating the signaling of multiple biological processes such as apoptosis, metabolism, cell proliferation and cell growth. PTEN is a dual protein/lipid phosphatase which main substrate is the phosphatidyl-inositol,3,4,5 triphosphate (PIP3), the product of PI3K. Increase in PIP3 recruits AKT to the membrane where it is activated by other kinases…	VALIDATED
163	MTOR	Not represented	P42345	HIF1A	HIF1A	Q16665	1	Kegg: 04066-HIF-1 signaling pathway; PMID: 24312355	An increasing body of evidence indicates that some growth factors, inflammatory cytokines, and other signaling molecules can stimulate HIF-1a protein synthesis through the activation of mTOR pathway.; mTOR activates HIF1A indirectly.	VALIDATED
164	GATA4	Not represented	P43694	NOS3	PI3K	P29474	1	PMID: 20974940	The ability of TBX5 and GATA4 to activate individually and cooperatively Nos3 transcription was directly tested by using a well studied NOS3-Luc reporter	VALIDATED
165	MK09	Not represented	P45984	NFKB1	NFKB	P19838	1	PMID: 20538053 // PMID: 20196785 // PMID: 25387687	FC(EtOH) (62.5 microg/mL) inhibited LPS-induced apoptosis by suppressing JNK1/2 activity, which resulted in the reduction of both IkappaB degradation and NFkappaB activation. // We found that LPS challenge activated JNK1/2, and then induced IkappaB degradation, NFkappaB activation, TNF-alpha up-regulation and subsequent myocardial apoptotic responses. // On the other hand, signalling pathways suc…	VALIDATED
166	MK09	Not represented	P45984	MK11	Not represented	Q15759	1	04917-Prolactin signaling pathway	04917-Prolactin signaling pathway	VALIDATED
166	MK09	Not represented	P45984	MK12	Not represented	P53778	1	04917-Prolactin signaling pathway	04917-Prolactin signaling pathway	VALIDATED
166	MK09	Not represented	P45984	MK13	Not represented	O15264	1	04917-Prolactin signaling pathway	04917-Prolactin signaling pathway	VALIDATED
166	MK09	Not represented	P45984	MK14	Not represented	Q16539	1	04917-Prolactin signaling pathway	04917-Prolactin signaling pathway	VALIDATED
167	PIK3CG	PI3K	P48736	Diabetic Macular Edema		Diabetic Macular Edema	1
168	PIK3CG	PI3K	P48736	AKT1	AKT	P31749	1	PMID: 12933816; kegg: hsa04012 // hsa04151	Androgen activates phosphatidylinositol 3-kinase (PI3K) and Akt, including AKT1 and AKT2, in AR-positive cells. AR interacts with the p85 regulatory subunit of PI3K, and its binding affinity is increased after androgen stimulation. Activation of PI3K/Akt by androgen was inhibited by dominant-negative Src. . These findings indicate that a triple complex between AR, p85 , and Src is required for an…	VALIDATED
168	PIK3CG	PI3K	P48736	AKT3	AKT	Q9Y243	1	PMID: 29956747	PI3K activates the serine/threonine Akt. Akt leads to the phosphorylation of serine/threonine mTOR via numerous regulators (23)	VALIDATED
169	CXCR4	CXCR4	P61073	Diabetic Macular Edema		Diabetic Macular Edema	1
170	SHC2	Not represented	P98077	SRC	SRC	P12931	1	PMID: 18840094	Although an interaction between Src and Shc has been described previously, in the present study we implicate the Shc SH2 domain as a novel mediator of this association.	VALIDATED
171	NFKB2	NFKB	Q00653	TNF	TNF	P01375	1	PMID: 32815413	charact: IL1B is a pivotal inflammatory cytokine that activates nuclear factor NF-kappa-B (NF-KB), resulting in the production of CXCL8, CCL2 and TNF. Moreover, IL1B also induces IL6 expression by activating IL6 promoter activity via p38MAPK/NF-KB pathway	VALIDATED
172	NFKB2	NFKB	Q00653	CXCL8	CXCL8	P10145	1	PMID: 32815413	charact: IL1B is a pivotal inflammatory cytokine that activates nuclear factor NF-kappa-B (NF-KB), resulting in the production of CXCL8, CCL2 and TNF. Moreover, IL1B also induces IL6 expression by activating IL6 promoter activity via p38MAPK/NF-KB pathway	VALIDATED
173	NFKB2	NFKB	Q00653	CCL2	CCL2	P13500	1	PMID: 32815413	charact: IL1B is a pivotal inflammatory cytokine that activates nuclear factor NF-kappa-B (NF-KB), resulting in the production of CXCL8, CCL2 and TNF. Moreover, IL1B also induces IL6 expression by activating IL6 promoter activity via p38MAPK/NF-KB pathway	VALIDATED
174	NFKB2	NFKB	Q00653	MMP9	Not represented	P14780	1	PMID: 19299915; [1] PMID: 20093109 [2] PMID: 16732316	NF-¿B, which is a well-known transcriptional factor to induce MMP-9 expression; [1] Nuclear factor-kappaB (NF-kappaB), a key transcription factor for the production of MMP-9, can be activated by various proinflammatory cytokines and promotes inflammation [2] Radiation regulates MMP-9 expression mainly through the PI3K/Akt-mediated NF-kappaB activation pathway.	VALIDATED
175	NFKB2	NFKB	Q00653	VCAM1	VCAM1	P19320	1	PMID: 11735124	NF-kappaB activation for constitutive expression of VCAM-1 and ICAM-1 on B lymphocytes and plasma cells.	VALIDATED
176	NFKB2	NFKB	Q00653	NFKB1	NFKB	P19838	1	PMID: 11134171	The most prevalent activated form of NF-κB is a heterodimer consisting of a p50 or p52 subunit and p65, which contains transactivation domains necessary for gene induction	VALIDATED
177	NFKB2	NFKB	Q00653	PTGS2	Not represented	P35354	1	[1] PMID: 11509575	[1] The prostaglandin H synthases (PGHS) catalyze the conversion of arachidonic acid to prostaglandin H(2), the committed step in prostanoid synthesis. Two forms of PGHS exist, PGHS-1 (COX-1) and PGHS-2 (COX-2). The gene encoding the latter form is known to be inducible by a number of stimuli including several inflammatory mediators. Recent evidence indicates that the inducible cyclooxygenase may…	VALIDATED
178	NFKB2	NFKB	Q00653	TJP1	TJP1	Q07157	-1	PMID: 30220553	TNF-α decreases mRNA levels of claudin-5 and zonula occludens protein 1 through an NF-κB–dependent mechanism. […] TNF-α activates PKCζ through as yet unknown mechanisms, which activates NF-κB signaling. NF-κB represses transcription of tight junction components claudin-5 and zonula occludens protein 1 (ZO-1), compromising endothelial tight junctions and facilitating BRB breakdown.	VALIDATED
179	NFKB2	NFKB	Q00653	ROBO4	ROBO4	Q8WZ75	1	PMID: 31160487	TNFα increased Robo4 expression in mice and human primary ECs by activating NF-kB	VALIDATED
180	NFKB2	NFKB	Q00653	Diabetic Macular Edema		Diabetic Macular Edema	1
181	TEK	Not represented	Q02763	Diabetic Macular Edema		Diabetic Macular Edema	1
182	TEK	Not represented	Q02763	Diabetic Macular Edema		Diabetic Macular Edema	-1
183	PTK2	Not represented	Q05397	SRC	SRC	P12931	1	PMID: 16919435	Recent studies have found that the FAK-Src complex is activated in many tumor cells and generates signals leading to tumor growth and metastasis.	VALIDATED
184	PTK2	Not represented	Q05397	AKT2	AKT	P31751	1	[1] PMID: 21209368 [2] PMID: 18452580 [3] PMID: 12502711 [4]PMID: 19956390	[1] FAK conventionally functions as an upstream regulator of Akt in many physiological and pathological cellular responses induced by various extracellular stimuli (27, 33, 35, 53). [2] Taken together, these results suggest that FAK is a mediator upstream of PI3K/Akt and NF-kappaB functions as a downstream effector and also positively regulates the activity of upstream kinases. [3] Therefore, FAK…	VALIDATED
185	PTK2	Not represented	Q05397	AKT1	AKT	P31749	1	[1] PMID: 21209368 [2] PMID: 18452580 [3] PMID: 12502711 [4]PMID: 19956390	[1] FAK conventionally functions as an upstream regulator of Akt in many physiological and pathological cellular responses induced by various extracellular stimuli (27, 33, 35, 53). [2] Taken together, these results suggest that FAK is a mediator upstream of PI3K/Akt and NF-kappaB functions as a downstream effector and also positively regulates the activity of upstream kinases. [3] Therefore, FAK…	VALIDATED
185	PTK2	Not represented	Q05397	AKT3	AKT	Q9Y243	1	[1] PMID: 21209368 [2] PMID: 18452580 [3] PMID: 12502711 [4]PMID: 19956390	[1] FAK conventionally functions as an upstream regulator of Akt in many physiological and pathological cellular responses induced by various extracellular stimuli (27, 33, 35, 53). [2] Taken together, these results suggest that FAK is a mediator upstream of PI3K/Akt and NF-kappaB functions as a downstream effector and also positively regulates the activity of upstream kinases. [3] Therefore, FAK…	VALIDATED
186	PRKCZ	aPKC	Q05513	TJP1	TJP1	Q07157	-1	PMID: 30220553	TNF-α activates PKCζ through as yet unknown mechanisms, which activates NF-κB signaling. NF-κB represses transcription of tight junction components claudin-5 and zonula occludens protein 1 (ZO-1)	VALIDATED
187	PRKCZ	aPKC	Q05513	Diabetic Macular Edema		Diabetic Macular Edema	1
188	PTPN11	Not represented	Q06124	IL6	IL6	P05231	-1	16012947; PMID: 22711165	Constitutive signal transducer and activator of transcription (STAT ) 3 activation promotes chronic inflammation and epithelial proliferation in murine colitis and human inflammatory bow el disease. SHP-2, through binding to the glycoprotein 130 signaling receptor, negatively regulates STAT 3 activation. Grow th hormone reduces disease activity and promotes mucosal healing in colitis and can acti…	VALIDATED
189	TJP1	TJP1	Q07157	Diabetic Macular Edema		Diabetic Macular Edema	-1
190	HIF1A	HIF1A	Q16665	TGFB1	TGFB1	P01137	1	Kegg: 05200-Pathways in cancer; [1] PMID: 21209004 [2] PMID: 23946285	Kegg: 05200-Pathways in cancer; [1] We previously reported that HIF-1 is upregulated and required for transforming growth factor (TGF)-β induction of collagen in renal tubular cells. (…) Knockdown of either HIF-a isoform blocked TGF-β-stimulated collagen protein expression. (…) Our findings thus support the hypothesis that the HIF and TGF-β signaling pathways interact to promote fibrogenesis even…	VALIDATED
191	HIF1A	HIF1A	Q16665	FGF2	FGF2	P09038	1	PMID: 19492421	We further demonstrated that HIF-1alpha could upregulate the expression of some soluble factors including bFGF and SDF-1alpha, which are released into the microenvironment to maintain the undifferentiated status of hES cells.	VALIDATED
192	HIF1A	HIF1A	Q16665	NOS2	NOS2	P35228	1	PMID: 15050899 // PMID: 15228594; PMID: 15228594	Activation of the transcription factor HIF-1 and its target genes, VEGF, HO-1, iNOS, during fracture repair. // HIF-1alpha reveals a binding activity to the promoter of iNOS gene after permanent middle cerebral artery occlusion.; HIF-1alpha reveals a binding activity to the promoter of iNOS gene after permanent middle cerebral artery occlusion.	VALIDATED
193	HIF1A	HIF1A	Q16665	CXCR4	CXCR4	P61073	1	PMID: 19212630	A recent study has shown that the activation of the chemokine receptor CXCR4 by lack of oxygen in breast cancer is HIF-1-dependent.	VALIDATED
194	HIF1A	HIF1A	Q16665	Diabetic Macular Edema		Diabetic Macular Edema	1
195	ROBO4	ROBO4	Q8WZ75	Diabetic Macular Edema		Diabetic Macular Edema	1
196	IKBKG	Not represented	Q9Y6K9	TNF	TNF	P01375	1	PMID: 23032186 // Kegg: 04064	The conjugated linear chains are specifically recognized by IKBKG, HOIL-1 and Sharpin, which is believed to further stabilize the TNF-R1/IKBKG/LUBAC signalling complex and recruit additional IKBKG molecules, facilitating IKK activation and NF-¿B-dependent gene expression. TNF stimulation induces the LUBAC-mediated linear ubiquitination of IKBKG and the different LUBAC components in the TNF-R comp…	VALIDATED
197	IKBKG	Not represented	Q9Y6K9	NFKB1	NFKB	P19838	1	KEGG: hsa04210 - Apoptosis // PMID: 16603398; KEGG: hsa04210 - Apoptosis // PMID: 16603398//; KEGG: hsa04210 - Apoptosis // PMID: 16603398//KEGG: hsa04210 - Apoptosis // PMID: 16603398////	The IKK complex is composed of two catalytic subunits, IKKa and IKKß, and an essential regulatory subunit, IKBKG (also known as IKK¿). IKK phosphorylates the NF-¿B inhibitor I¿B and targets this inhibitor for degradation by the ubiquitin-proteasome pathway. NF-¿B is then liberated to enter the nucleus to turn on downstream target genes involved in immune and inflammatory responses.; The IKK compl…	VALIDATED
198	Aflibercept		Aflibercept	VEGFR1	VEGFR1	P17948	-1
199	PIK3R1	PI3K	P27986	RAF1	Not represented	P04049	1	PMID: 16935846	the IGF-I-induced activation of Rap1, Raf-1, ERK, and PRL release were blocked by inhibiting PI3K/Akt.	VALIDATED
199	PIK3R2	PI3K	O00459	RAF1	Not represented	P04049	1	PMID: 16935846	the IGF-I-induced activation of Rap1, Raf-1, ERK, and PRL release were blocked by inhibiting PI3K/Akt.	VALIDATED
199	PIK3CB	PI3K	P42338	RAF1	Not represented	P04049	1	PMID: 16935846	the IGF-I-induced activation of Rap1, Raf-1, ERK, and PRL release were blocked by inhibiting PI3K/Akt.	VALIDATED
200	PIK3R1	PI3K	P27986	SRC	SRC	P12931	1	PMID: 27169346	The protein kinase activity of PI3K phosphorylates serine residue 70 on Src to enhance its activity	VALIDATED
200	PIK3R2	PI3K	O00459	SRC	SRC	P12931	1	PMID: 27169346	The protein kinase activity of PI3K phosphorylates serine residue 70 on Src to enhance its activity	VALIDATED
200	PIK3CB	PI3K	P42338	SRC	SRC	P12931	1	PMID: 27169346	The protein kinase activity of PI3K phosphorylates serine residue 70 on Src to enhance its activity	VALIDATED
201	PIK3R1	PI3K	P27986	AKT2	AKT	P31751	1	PMID: 26693066; [1] PMID: 26233890 [2] KEGG: hsa04380 - Osteoclast differentiation	We found that F56 inhibited VEGF-induced phosphorylation of VEGFR1, as well as the phosphorylation of the downstream of PI3K-AKT axis; [1] The serine/threonine kinase AKT (also known as protein kinase B), comprising a group of three isoforms (AKT1, AKT2, and AKT3) in mammals, is a key propagator of PI3K signaling. In the canonical PI3K/AKT activation model, AKT and its upstream kinase, 3-phosphoi…	VALIDATED
201	PIK3R2	PI3K	O00459	AKT2	AKT	P31751	1	PMID: 26693066; [1]PMID: 18473732 [2]KEGG: hsa04380 - Osteoclast differentiation	PTEN/PI3K/AKT constitutes an important pathway regulating the signaling of multiple biological processes such as apoptosis, metabolism, cell proliferation and cell growth. PTEN is a dual protein/lipid phosphatase which main substrate is the phosphatidyl-inositol,3,4,5 triphosphate (PIP3), the product of PI3K. Increase in PIP3 recruits AKT to the membrane where it is activated by other kinases als…	VALIDATED
201	PIK3CB	PI3K	P42338	AKT2	AKT	P31751	1	[1]PMID: 18473732 [2]KEGG: hsa04380 - Osteoclast differentiation	PTEN/PI3K/AKT constitutes an important pathway regulating the signaling of multiple biological processes such as apoptosis, metabolism, cell proliferation and cell growth. PTEN is a dual protein/lipid phosphatase which main substrate is the phosphatidyl-inositol,3,4,5 triphosphate (PIP3), the product of PI3K. Increase in PIP3 recruits AKT to the membrane where it is activated by other kinases als…	VALIDATED
202	PIK3R1	PI3K	P27986	PRKCZ	aPKC	Q05513	1	DOI 10.1074/jbc.M508810200	The mechanism of PI3K activation of PKC involves PDK1, a kinase known to phosphorylate PKC	VALIDATED
202	PIK3R2	PI3K	O00459	PRKCZ	aPKC	Q05513	1	DOI 10.1074/jbc.M508810200	The mechanism of PI3K activation of PKC involves PDK1, a kinase known to phosphorylate PKC	VALIDATED
202	PIK3CB	PI3K	P42338	PRKCZ	aPKC	Q05513	1	DOI 10.1074/jbc.M508810200	The mechanism of PI3K activation of PKC involves PDK1, a kinase known to phosphorylate PKC	VALIDATED
203	PIK3R1	PI3K	P27986	AKT1	AKT	P31749	1	PMID: 10527852//kegg: hsa04012 // hsa04151; PMID: 12933816; PMID: 26693066	Androgen activates phosphatidylinositol 3-kinase (PI3K) and Akt, including AKT1 and AKT2, in AR-positive cells. AR interacts with the p85 regulatory subunit of PI3K, and its binding affinity is increased after androgen stimulation. Activation of PI3K/Akt by androgen was inhibited by dominant-negative Src. . These findings indicate that a triple complex between AR, p85 , and Src is required for an…	VALIDATED
203	PIK3R2	PI3K	O00459	AKT1	AKT	P31749	1	PMID: 26693066; kegg: hsa04012 // hsa04151	PK3R2 activates AKT1 via PIP3; We found that F56 inhibited VEGF-induced phosphorylation of VEGFR1, as well as the phosphorylation of the downstream of PI3K-AKT axis	VALIDATED
203	PIK3CB	PI3K	P42338	AKT1	AKT	P31749	1	kegg: hsa04012 // hsa04151	PI3KCB activates AKT1 via PIP3	VALIDATED
203	PIK3R1	PI3K	P27986	AKT3	AKT	Q9Y243	1	PMID: 26693066	We found that F56 inhibited VEGF-induced phosphorylation of VEGFR1, as well as the phosphorylation of the downstream of PI3K-AKT axis	VALIDATED
203	PIK3R2	PI3K	O00459	AKT3	AKT	Q9Y243	1	PMID: 26693066	We found that F56 inhibited VEGF-induced phosphorylation of VEGFR1, as well as the phosphorylation of the downstream of PI3K-AKT axis	VALIDATED
203	PIK3CB	PI3K	P42338	AKT3	AKT	Q9Y243	1	[1]PMID: 18473732 [2]KEGG: hsa04380 - Osteoclast differentiation	PTEN/PI3K/AKT constitutes an important pathway regulating the signaling of multiple biological processes such as apoptosis, metabolism, cell proliferation and cell growth. PTEN is a dual protein/lipid phosphatase which main substrate is the phosphatidyl-inositol,3,4,5 triphosphate (PIP3), the product of PI3K. Increase in PIP3 recruits AKT to the membrane where it is activated by other kinases als…	VALIDATED
204	MK11	Not represented	Q15759	Diabetic Macular Edema		Diabetic Macular Edema	1
204	MK12	Not represented	P53778	Diabetic Macular Edema		Diabetic Macular Edema	1
204	MK13	Not represented	O15264	Diabetic Macular Edema		Diabetic Macular Edema	1
204	MK14	Not represented	Q16539	Diabetic Macular Edema		Diabetic Macular Edema	1
205	BCL2L11	Not represented	O43521	BCL2	Not represented	P10415	-1	PMID: 15079075	Bim, a distant proapoptotic relative, is emerging as a major physiologic antagonist of Bcl2.	VALIDATED
205	BAD	Not represented	Q92934	BCL2	Not represented	P10415	-1	PMID: 7834748	Bad selectively dimerized with Bcl-xL as well as Bcl-2, but not with Bax, Bcl-xs, Mcl-1, A1, or itself. Bad binds more strongly to Bcl-xL than Bcl-2 in mammalian cells, and it reversed the death repressor activity of Bcl-xL, but not that of Bcl-2. When Ba	VALIDATED
206	CREB3	Not represented	O43889	CXCR4	CXCR4	P61073	1	PMID: 20473547	both knock-down of CREB3 and overexpression of HDAC3 suppressed the transcriptional activation of the novel CREB3-regulated gene, CXCR4. Furthermore, CREB3 was shown to bind to the CRE element in the CXCR4 promoter and to activate the transcription of the CXCR4 gene by causing dissociation of HDAC3 and subsequently increasing histone acetylation.	VALIDATED
206	MYC	Not represented	P01106	CXCR4	CXCR4	P61073	1	PMID: 10229837	In this study, we show that USF/c-Myc up-regulates, while YY1 down-regulates the promoter activity of CXCR4, a coreceptor for T cell-tropic HIV-1 entry	VALIDATED
206	SNAI2	Not represented	O43623	CXCR4	CXCR4	P61073	1	PMID: 22074556	We found that forced expression of SLUG significantly upregulated both CXCL12 and CXCR4 expression and their downstream target MMP9. CXCR4 is a target of SLUG in prostate cancer cell lines. Expression of SLUG increased CXCR4 protein expression.	VALIDATED
207	JAK1	JAK/STAT	P23458	PIK3CD	PI3K	O00329	1	[1] PMID: 17982039 [2] PMID: 22711705	[1] JAK inhibitor I suppressed the phosphorylation of GSK3(S9) (Fig. 3C), suggesting a potential role of JAK in PI3K-signaling pathways. [2] JAK activation is followed by phosphorylation of tyrosine residues in various proteins (including receptors such as gp130 and IRS family members) again providing binding sites for SH2 domain– containing proteins (10). The creation of the SH2-binding domain a…	VALIDATED
207	JAK2	JAK/STAT	O60674	PIK3CD	PI3K	O00329	1	Kegg: 04151-PI3K-Akt signaling pathway; PMID: 26408371; Kegg: 04151-PI3K-Akt signaling pathway; PMID: 26408371; Kegg: 04151-PI3K-Akt signaling pathway; PMID: 26408371; [1]PMID: 30320189 [2]PMID: 22402124; [1]PMID: 30320189 [2]PMID: 22402124; Kegg: 04151-PI3K-Akt signaling pathway; PMID: 26408371; [1]PMID: 30320189 [2]PMID: 22402124; [1]PMID: 30320189 [2]PMID: 22402124	Figure 1: Signaling pathways activated by cytokine receptor binding. PI3K, Akt and STAT are activated after the phosphorylation of JAK2.; Figure 1: Signaling pathways activated by cytokine receptor binding. PI3K, Akt and STAT are activated after the phosphorylation of JAK2.; Figure 1: Signaling pathways activated by cytokine receptor binding. PI3K, Akt and STAT are activated after the phosphoryla…	VALIDATED
207	JAK3	JAK/STAT	P52333	PIK3CD	PI3K	O00329	1	[1] PMID: 17982039 [2] PMID: 22711705	[1] JAK inhibitor I suppressed the phosphorylation of GSK3(S9) (Fig. 3C), suggesting a potential role of JAK in PI3K-signaling pathways. [2] JAK activation is followed by phosphorylation of tyrosine residues in various proteins (including receptors such as gp130 and IRS family members) again providing binding sites for SH2 domain– containing proteins (10). The creation of the SH2-binding domain a…	VALIDATED
208	CCL5	CCL5	P13501	Diabetic Macular Edema		Diabetic Macular Edema	1
208	IL1B	IL1B	P01584	Diabetic Macular Edema		Diabetic Macular Edema	1
209	CXCL10	CXCL10	P02778	Diabetic Macular Edema		Diabetic Macular Edema	1
209	LEG1	Not represented	P09382	Diabetic Macular Edema		Diabetic Macular Edema	1
209	SELE	SELE	P16581	Diabetic Macular Edema		Diabetic Macular Edema	1
209	TF65	Not represented	Q04206	Diabetic Macular Edema		Diabetic Macular Edema	1
209	VEGFB	Not represented	P49765	Diabetic Macular Edema		Diabetic Macular Edema	1
210	AKT1	AKT	P31749	BCL2	Not represented	P10415	1	PMID: 26276357 // PMID: 26067553	Gab1 regulates SDF-1-induced progression via inhibition of apoptosis pathway induced by PI3K/AKT/Bcl-2/BAX pathway in human chondrosarcoma. // RLIP76-dependent suppression of PI3K/AKT/Bcl-2 pathway by miR-101 induces apoptosis in prostate cancer.	VALIDATED
210	AKT3	AKT	Q9Y243	BCL2	Not represented	P10415	1	PMID: 26276357 // PMID: 26067553	Gab1 regulates SDF-1-induced progression via inhibition of apoptosis pathway induced by PI3K/AKT/Bcl-2/BAX pathway in human chondrosarcoma. // RLIP76-dependent suppression of PI3K/AKT/Bcl-2 pathway by miR-101 induces apoptosis in prostate cancer.	VALIDATED
211	AKT1	AKT	P31749	NOS3	NOS3	P29474	1	PMID:20607729; https://doi.org/10.1161/01.CIR.0000129768.35536.FA	In hypertension, reduced nitric oxide production and blunted endothelial vasorelaxation are observed. It was recently reported that AKT phosphorylates and activates endothelial nitric oxide synthase and that impaired kinase activity may be involved in endothelial dysfunction.; NOS2 and ARG1 (human homologues) are also linked to AKT1 thorough NOS3; AKT1 is also linked, via NOS3 (eNOS), to ARG1 and…	VALIDATED
211	AKT3	AKT	Q9Y243	NOS3	NOS3	P29474	1	PMID:20607729; https://doi.org/10.1161/01.CIR.0000129768.35536.FA	In hypertension, reduced nitric oxide production and blunted endothelial vasorelaxation are observed. It was recently reported that AKT phosphorylates and activates endothelial nitric oxide synthase and that impaired kinase activity may be involved in endothelial dysfunction.; NOS2 and ARG1 (human homologues) are also linked to AKT1 thorough NOS3; AKT1 is also linked, via NOS3 (eNOS), to ARG1 and…	VALIDATED
212	AKT1	AKT	P31749	NOS2	NOS3	P35228	1	PMID: 28067899	Taken together, these results strongly suggest that Akt activation mediates Nos2 induction in the dilated aortic wall.	VALIDATED
212	AKT3	AKT	Q9Y243	NOS2	NOS3	P35228	1	PMID: 28067899	Taken together, these results strongly suggest that Akt activation mediates Nos2 induction in the dilated aortic wall.	VALIDATED
213	MK08	Not represented	P45983	CXCL8	CXCL8	P10145	1	Kegg: 05131- Shigellosis	MK08 leads to CXCL8 activation	VALIDATED
213	MK10	Not represented	P53779	CXCL8	CXCL8	P10145	1	PMID: 12225945 // PMID: 29373608	We conclude that, in human airway epithelial cells, MAP kinases may regulate IL-8 promoter activity by NF-kappaB-dependent (in the case of JNK) // Interleukin-33 induces interleukin-8 expression via JNK/c-Jun/AP-1 pathway in human umbilical vein endothelial cells	VALIDATED
214	MK08	Not represented	P45983	NFKB1	NFKB	P19838	1	PMID: 20538053 // PMID: 20196785	FC(EtOH) (62.5 microg/mL) inhibited LPS-induced apoptosis by suppressing JNK1/2 activity, which resulted in the reduction of both IkappaB degradation and NFkappaB activation. // We found that LPS challenge activated JNK1/2, and then induced IkappaB degradation, NFkappaB activation, TNF-alpha up-regulation and subsequent myocardial apoptotic responses.	VALIDATED
214	MK10	Not represented	P53779	NFKB1	NFKB	P19838	1	PMID: 29114233	JNK can directly activate NF-kB by promoting IkBα degradation	VALIDATED
215	MK08	Not represented	P45983	MK11	Not represented	Q15759	1	04917-Prolactin signaling pathway	04917-Prolactin signaling pathway	VALIDATED
215	MK10	Not represented	P53779	MK11	Not represented	Q15759	1	04917-Prolactin signaling pathway	04917-Prolactin signaling pathway	VALIDATED
215	MK08	Not represented	P45983	MK12	Not represented	P53778	1	04917-Prolactin signaling pathway	04917-Prolactin signaling pathway	VALIDATED
215	MK10	Not represented	P53779	MK12	Not represented	P53778	1	04917-Prolactin signaling pathway	04917-Prolactin signaling pathway	VALIDATED
215	MK08	Not represented	P45983	MK13	Not represented	O15264	1	04917-Prolactin signaling pathway	04917-Prolactin signaling pathway	VALIDATED
215	MK10	Not represented	P53779	MK13	Not represented	O15264	1	04917-Prolactin signaling pathway	04917-Prolactin signaling pathway	VALIDATED
215	MK08	Not represented	P45983	MK14	Not represented	Q16539	1	04917-Prolactin signaling pathway	04917-Prolactin signaling pathway	VALIDATED
215	MK10	Not represented	P53779	MK14	Not represented	Q16539	1	04917-Prolactin signaling pathway	04917-Prolactin signaling pathway	VALIDATED

## Sheet: S5
Supplementary Table S5. Intravitreal aflibercept injection's drug targets profile according to Anaxomic’s drug characterization protocol. The effect of the drug over the proposed target (red arrow (↓) indicates an inhibition of the protein activity upon the drug’s application) is included.
Drug	Ligand's receptor	UniProt ID	Protein Name	Gene Name	Effect	References
Intravitreal aflibercept injection	VEGFR1	P49763	Placental growth factor	PlGF	↓	PMID: 29146905; 32504038;28373914;https://www.ema.europa.eu/en/documents/product-information/eylea-epar-product-information_en.pdf;https://www.bayer.com/sites/default/files/2020-11/eylea-pm-en%20%281%29.pdf
		P49765	Vascular endothelial growth factor B	VEGFB	↓	PMID: 28373914;https://www.ema.europa.eu/en/documents/product-information/eylea-epar-product-information_en.pdf;
	VEGFR2	P09382	Galectin-1	LGALS1	↓	PMID: 31010334
		P15692	Vascular endothelial growth factor A	VEGFA	↓	PMID: 28373914;https://www.ema.europa.eu/en/documents/product-information/eylea-epar-product-information_en.pdf;https://www.bayer.com/sites/default/files/2020-11/eylea-pm-en%20%281%29.pdf
VEGFR: Vascular endothelial growth factor receptor

## Sheet: S6
Supplementary Table S6. Compendium of biological and clinical data defining human physiology. Summary of data (number of entries in the database for each data type) used for model construction (network and truth table).
Data type	Number of entries
In-house databases information*
Considered Interactions	437 071
Considered Proteins	16 961
Characterized Drugs	5 414
Drug Targets	2 690
Characterized Clinical Conditions	253
Clinical Conditions Key Proteins Characterized	4 076
Training set information**
Curated drug-indications restrictions	180 264 (1 731 positive)
Drug-ADRs restrictions	30 096 (2 640 positive)
Drug-indications/ADRs protein correlations	2 655
ADR=adverse drug reactions; The values correspond to the 3 models used throughout the study.
*In-house databases information: Information about available relationships (edges or links) between proteins (nodes) from a regularly updated in-house database drawn from public sources: KEGG, REACTOME INTACT, BIOGRID, HPRD, and TRRUST. **Training set: The training set is a collection of a known input-output information to generate certain rules that the human physiology has to fulfill. The data …
